# Supplementary material for: Palladium-catalyzed regioselective hydrosulfonylation of allenes with sulfinic acids
Source: Royal Society of Chemistry journal article supplement (doi:10.1039/d1ra09036d), 2022-01-01
Supplement: d1ra09036d1.pdf [file d1ra09036d1.pdf]

## Supporting Information

### **Palladium-catalyzed regioselective hydrosulfonylation of allenamides with arylsulfonic acids**

Luan-Ying Li,<sup>‡a</sup> Bo-Rong Leng,<sup>‡ab</sup> Jia-Zhuo Li,<sup>a</sup> Qing-Quan Liu,<sup>a</sup> Jianguang Yu,<sup>\*a</sup> Ping Wei,<sup>a</sup> De-Cai Wang,<sup>\*a</sup> Yi-Long Zhu<sup>\*a</sup>

<sup>a</sup>School of Pharmaceutical Sciences, Nanjing Tech University, Nanjing 211816, P. R. China. E-mail: zhuyilong\_88@njtech.edu.cn, dcwang@njtech.edu.cn, yjg@njtech.edu.cn

<sup>b</sup>College of Life and Health, Nanjing Polytechnic Institute, Nanjing 210048, P. R. China.

#### Context

|                                                                                                                                 |    |
|---------------------------------------------------------------------------------------------------------------------------------|----|
| General Information .....                                                                                                       | 1  |
| Deuterium-Labeling Experiment Result.....                                                                                       | 1  |
| General Procedure for the Synthesis of Compound <b>3</b> and <b>4</b> .....                                                     | 2  |
| Characterization Data of Compounds <b>3a-3z</b> and <b>3aa-3ab</b> .....                                                        | 2  |
| Characterization Data of Compounds <b>4a-4j</b> .....                                                                           | 9  |
| Copies of <sup>1</sup> H, <sup>13</sup> C NMR and <sup>19</sup> F NMR Spectra of Products <b>3a-3z</b> and <b>3aa-3ab</b> ..... | 12 |
| Copies of <sup>1</sup> H, <sup>13</sup> C NMR and <sup>19</sup> F NMR Spectra of Products <b>4a-4j</b> .....                    | 42 |

## General Information

$^1\text{H}$  NMR ( $^{13}\text{C}$  NMR) spectra were measured on a Bruker DPX 400 MHz spectrometer in  $\text{CDCl}_3$  with chemical shift ( $\delta$ ) given in ppm relative to TMS as internal standard [(s = singlet, d = doublet, t = triplet, brs = broad singlet, m = multiplet), coupling constant (Hz)]. High-resolution mass spectra (HRMS) were obtained on an Agilent mass spectrometer using ESI-TOF (electrospray ionization-time of flight). X-Ray crystallographic analysis was performed with a Siemens SMART CCD and a Siemens P4 diffractometer. Column chromatography was generally performed on silica gel (200-300 mesh) and reactions were monitored with thinlayer chromatography (TLC) using 254 nm UV light. The melting points were measured with digital melting point detector.

## Deuterium-Labeling Experiment Result

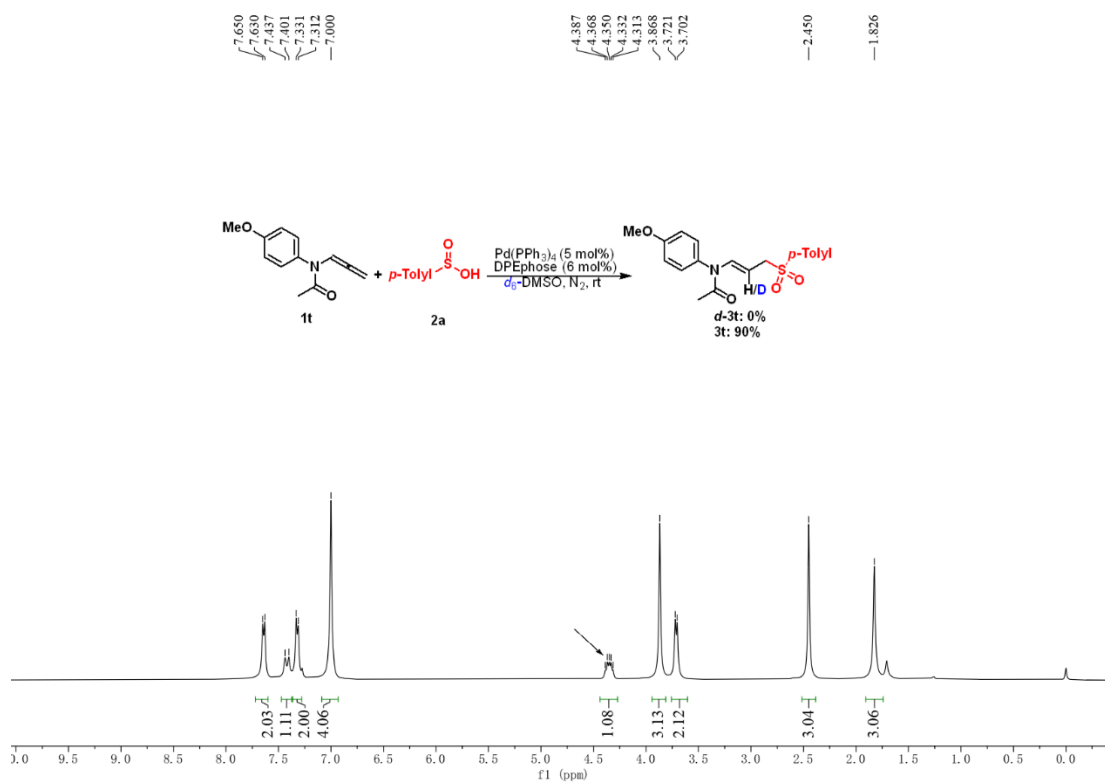

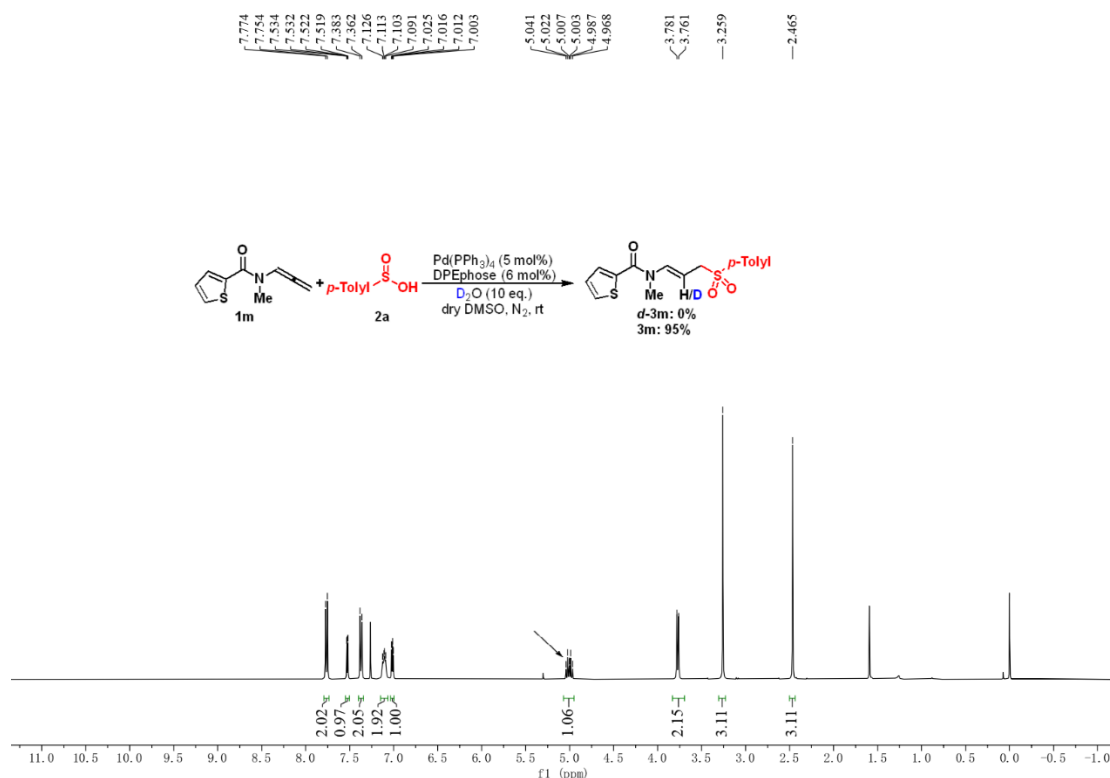

## General Procedure for the Synthesis of Compound 3 and 4

### Example for the synthesis of 3a

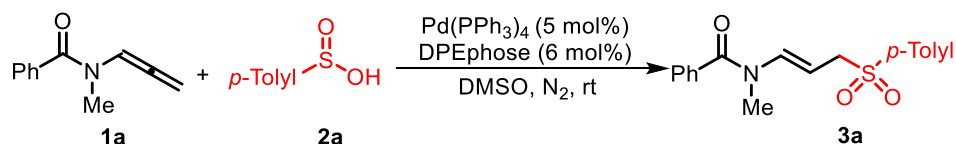

In a flame-dried Schlenk tube along with a stir bar under nitrogen conditions, allenamide (**1a**, 0.2 mmol, 34.6 mg), *p*-methylbenzenesulfonic acid (**2a**, 0.24 mmol, 37.5 mg) and Pd(PPh<sub>3</sub>)<sub>4</sub> (11.55 mg, 0.01 mmol), DPEphos (6.45 mg, 0.012 mmol) was added into the tube and then dry DMSO (2 mL) was injected into the reaction system. Subsequently, the tube was stirred at room temperature. The reaction was stirred for 6h and monitored by TLC. Upon completion, the reaction mixture was concentrated by vacuum distillation and purified by flash column chromatography to afford the desired pure product **3a** (eluent: ethyl acetate/petroleum ether = 1:6).

## Characterization Data of Compounds 3a-3z and 3aa-3ab

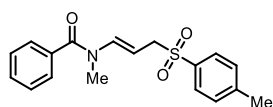

*(E)*-*N*-methyl-*N*-(3-tosylprop-1-en-1-yl)benzamide (**3a**)

Light yellow solid; 63.2mg, 96 % yield; mp: 123-125°C; <sup>1</sup>H NMR (400 MHz, CDCl<sub>3</sub>; δ, ppm) δ 7.73 (d, *J* = 7.6 Hz, 2H), 7.49-7.41 (m, 1H), 7.41-7.32 (m, 4H), 7.30-7.19 (m, 2H), 6.61 (s, 1H), 5.04-4.85 (m, 1H), 3.69 (d, *J* = 7.6 Hz, 2H), 3.20 (s, 3H), 2.48 (s, 3H); <sup>13</sup>C NMR (100 MHz, CDCl<sub>3</sub>; δ, ppm) δ 170.3, 144.8, 135.4, 134.3, 130.7, 129.8, 128.5, 128.5, 128.0, 58.5, 21.7. HR-MS (ESI-TOF, *m/z*) calcd for C<sub>18</sub>H<sub>19</sub>NO<sub>3</sub>S [M+Na]<sup>+</sup> 352.0983; found, 352.0974.

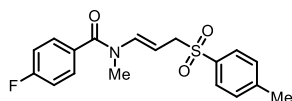

**(E)-4-fluoro-N-methyl-N-(3-tosylprop-1-en-1-yl)benzamide (3b)**

White solid; 64.5mg, 93% yield; mp: 128-130°C; <sup>1</sup>H NMR (400 MHz, CDCl<sub>3</sub>; δ, ppm) δ 7.74 (d, *J* = 8.4 Hz, 2H), 7.38 (d, *J* = 8.0 Hz, 2H), 7.35-7.25 (m, 2H), 7.06 (t, *J* = 8.4 Hz, 2H), 5.09-4.85 (m, 2H), 3.70 (d, *J* = 6.8 Hz, 2H), 3.20 (s, 1H), 2.48 (s, 1H); <sup>13</sup>C NMR (100 MHz, CDCl<sub>3</sub>; δ, ppm) δ 169.3, 163.9 (d, *J* = 250.4 Hz), 162.7, 144.8, 135.4, 130.6, 130.5, 130.4, 129.8, 128.5, 115.7 (d, *J* = 21.7 Hz), 58.4, 21.7.; <sup>19</sup>F NMR (376 MHz, Chloroform-*d*) δ -108.16. HR-MS (ESI-TOF, *m/z*) calcd for C<sub>18</sub>H<sub>18</sub>FNO<sub>3</sub>S [M+Na]<sup>+</sup> 370.0889; found, 370.0880.

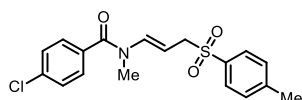

**(E)-4-chloro-N-methyl-N-(3-tosylprop-1-en-1-yl)benzamide (3c)**

White solid; 67.5mg, 93 % yield; mp: 159-161°C; <sup>1</sup>H NMR (400 MHz, CDCl<sub>3</sub>; δ, ppm) δ 7.74 (d, *J* = 8.0 Hz, 2H), 7.36 (t, *J* = 8.4 Hz, 4H), 7.30-7.21 (m, 2H), 6.60 (s, 1H), 5.07-4.88 (m, 1H), 3.69 (d, *J* = 7.6 Hz, 2H), 3.20 (s, 3H), 2.48 (s, 3H); <sup>13</sup>C NMR (100 MHz, CDCl<sub>3</sub>; δ, ppm) δ 169.2, 144.8, 137.0, 135.5, 135.1, 132.7, 129.8, 129.6, 128.8, 128.5, 108.2, 58.4, 21.7; HR-MS (ESI-TOF, *m/z*) calcd for C<sub>18</sub>H<sub>18</sub>ClNO<sub>3</sub>S [M+Na]<sup>+</sup> 386.0594; found, 386.0598.

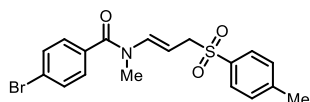

**(E)-4-bromo-N-methyl-N-(3-tosylprop-1-en-1-yl)benzamide (3d)**

White solid; 76.5mg, 94 % yield; mp: 165-167°C; <sup>1</sup>H NMR (400 MHz, CDCl<sub>3</sub>; δ, ppm) δ 7.74 (d, *J* = 8.0 Hz, 2H), 7.51 (d, *J* = 8.0 Hz, 2H), 7.38 (d, *J* = 8.0 Hz, 2H), 7.17 (d, *J* = 7.6 Hz, 2H), 6.57 (s, 1H), 5.10-4.89 (m, 1H), 3.70 (s, 2H), 3.20 (s, 3H), 2.49 (s, 3H); <sup>13</sup>C NMR (100 MHz, CDCl<sub>3</sub>; δ, ppm) δ 169.3, 144.9, 135.4, 133.1, 131.8, 130.1, 129.8, 129.7, 128.5, 128.5, 125.3, 58.3, 21.7; HR-MS (ESI-TOF, *m/z*) calcd for C<sub>18</sub>H<sub>18</sub>FNO<sub>3</sub>S [M+Na]<sup>+</sup> 430.0086; found, 430.0080.

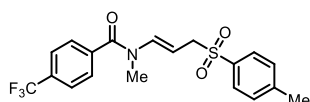

**(E)-N-methyl-N-(3-tosylprop-1-en-1-yl)-4-(trifluoromethyl)benzamide (3e)**

White solid; 65.1mg, 82 % yield; mp: 149-151°C; <sup>1</sup>H NMR (400 MHz, CDCl<sub>3</sub>; δ, ppm) δ 7.74 (d, *J* = 8.0 Hz, 2H), 7.64 (d, *J* = 8.0 Hz, 2H), 7.51-7.33 (m, 4H), 6.48 (s, 1H), 5.02 (s, 1H), 3.68 (s, 2H), 3.24 (s, 3H), 2.48 (s, 3H); <sup>13</sup>C NMR (100 MHz, CDCl<sub>3</sub>; δ, ppm) δ 168.8, 144.9, 137.9, 135.5, 132.5 (*J* =

32.6 Hz), 129.9, 128.5, 125.6 ( $J = 3.9$  Hz), 123.5 ( $J = 272.5$  Hz), 58.2, 30.4, 21.7.  $^{19}\text{F}$  NMR (376 MHz, Chloroform- $d$ )  $\delta$  -63.04. HR-MS (ESI-TOF,  $m/z$ ) calcd for  $\text{C}_{19}\text{H}_{18}\text{F}_3\text{NO}_3\text{S}$   $[\text{M}+\text{Na}]^+$  420.0857; found, 420.0854.

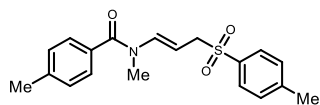

**(E)-N,4-dimethyl-N-(3-tosylprop-1-en-1-yl)benzamide (3f)**

White solid, 62.4mg, 91% yield; mp: 110-112°C;  $^1\text{H}$  NMR (400 MHz,  $\text{CDCl}_3$ ;  $\delta$ , ppm)  $\delta$  7.73 (d,  $J = 8.4$  Hz, 2H), 7.37 (d,  $J = 8.0$  Hz, 2H), 7.24-7.10 (m, 4H), 6.69 (s, 1H), 5.00-4.83 (m, 1H), 3.69 (d,  $J = 7.6$  Hz, 2H), 3.19 (s, 3H), 2.48 (s, 3H), 2.39 (s, 3H).  $^{13}\text{C}$  NMR (100 MHz,  $\text{CDCl}_3$ ;  $\delta$ , ppm)  $\delta$  170.5, 144.8, 141.2, 135.4, 131.4, 129.8, 129.1, 128.6, 128.2, 58.5, 21.7, 21.5.; HR-MS (ESI-TOF,  $m/z$ ) calcd for  $\text{C}_{19}\text{H}_{21}\text{NO}_3\text{S}$   $[\text{M}+\text{Na}]^+$  366.1140; found, 366.1132.

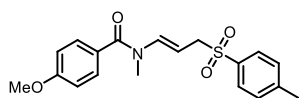

**(E)-4-methoxy-N-methyl-N-(3-tosylprop-1-en-1-yl)benzamide (3g)**

White solid; 66.7mg, 93 % yield; mp: 162-164°C;  $^1\text{H}$  NMR (400 MHz,  $\text{CDCl}_3$ ;  $\delta$ , ppm)  $\delta$  7.74 (d,  $J = 8.4$  Hz, 2H), 7.37 (d,  $J = 8.4$  Hz, 2H), 7.32-7.19 (m, 2H), 6.94-6.82 (m, 3H), 4.99-4.83 (m, 1H), 3.85 (s, 3H), 3.71 (d,  $J = 7.6$  Hz, 2H), 3.20 (s, 3H), 2.48 (s, 3H).  $^{13}\text{C}$  NMR (100 MHz,  $\text{CDCl}_3$ ;  $\delta$ , ppm)  $\delta$  170.2, 161.6, 144.8, 135.4, 130.4, 130.1, 129.8, 128.6, 126.3, 113.7, 94.9, 58.6, 55.4, 21.7. HR-MS (ESI-TOF,  $m/z$ ) calcd for  $\text{C}_{19}\text{H}_{21}\text{NO}_4\text{S}$   $[\text{M}+\text{Na}]^+$  382.1089; found, 382.1082.

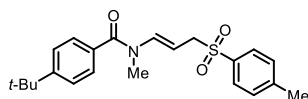

**(E)-4-(tert-butyl)-N-methyl-N-(3-tosylprop-1-en-1-yl)benzamide (3h)**

White solid; 71.6mg, 93 % yield; mp: 95-97°C;  $^1\text{H}$  NMR (400 MHz,  $\text{CDCl}_3$ ;  $\delta$ , ppm)  $\delta$  7.74 (d,  $J = 8.0$  Hz, 2H), 7.37 (dd,  $J = 8.4, 3.6$  Hz, 4H), 7.21 (d,  $J = 7.6$  Hz, 2H), 6.76 (s, 1H), 5.09-4.78 (m, 1H), 3.72 (d,  $J = 5.2$  Hz, 2H), 3.20 (s, 3H), 2.49 (s, 3H), 1.33 (s, 9H).  $^{13}\text{C}$  NMR (101 MHz,  $\text{CDCl}_3$ ;  $\delta$ , ppm)  $\delta$  170.5, 154.2, 144.8, 135.4, 131.2, 129.8, 128.6, 128.1, 125.4, 58.5, 34.9, 31.2, 21.7.; HR-MS (ESI-TOF,  $m/z$ ) calcd for  $\text{C}_{22}\text{H}_{27}\text{NO}_3\text{S}$   $[\text{M}+\text{Na}]^+$  408.1609; found, 408.1614.

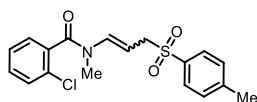

**2-chloro-N-methyl-N-(3-tosylprop-1-en-1-yl)benzamide (3i)**

Light yellow solid, 68.2mg, 94 % yield; mp: 118-119°C;  $^1\text{H}$  NMR (400 MHz,  $\text{CDCl}_3$ ;  $\delta$ , ppm)  $\delta$  7.66 (d,  $J = 8.0$  Hz, 2H), 7.45-7.09 (m, 6H), 6.16 (s, 1H), 5.17-4.91 (m, 1H), 3.86 (d,  $J = 7.6$  Hz, 2H), 3.25 (s, 3H), 2.46 (s, 3H);  $^{13}\text{C}$  NMR (100 MHz,  $\text{CDCl}_3$ ;  $\delta$ , ppm)  $\delta$  167.4, 144.8, 136.2, 133.8, 131.0, 130.6, 129.8, 129.8, 128.4, 128.3, 127.2, 96.6, 58.2, 33.6, 21.7. HR-MS (ESI-TOF,  $m/z$ ) calcd for  $\text{C}_{18}\text{H}_{18}\text{ClNO}_3\text{S}$   $[\text{M}+\text{Na}]^+$  386.0594; found, 386.0586.

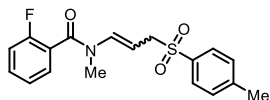

**2-fluoro-N-methyl-N-(3-tosylprop-1-en-1-yl)benzamide (3j)**

Light yellow solid, 63.1mg, 91% yield; mp: 139-140°C; <sup>1</sup>H NMR (400 MHz, CDCl<sub>3</sub>; δ, ppm) δ 7.68 (d, *J* = 8.0 Hz, 2H), 7.50-7.30 (m, 4H), 7.23-6.98 (m, 3H), 6.34 (d, *J* = 14.0, 1H), 4.99-4.92 (m, 1H), 3.65 (d, *J* = 7.6 Hz, 2H), 3.24 (s, 3H), 2.47 (s, 3H). <sup>13</sup>C NMR (101 MHz, CDCl<sub>3</sub>) δ 165.9, 158.27 (*J* = 248.6 Hz), 144.8, 136.7, 135.2, 132.3 (*J* = 8.0 Hz), 129.8, 129.4, 128.4, 124.75 (*J* = 20.1 Hz), 116.1 (*J* = 20.5 Hz), 96.4, 58.2, 33.92, 29.8, 21.7.; <sup>19</sup>F NMR (376 MHz, Chloroform-*d*) δ -113.61, 114.09. HR-MS (ESI-TOF, *m/z*) calcd for C<sub>18</sub>H<sub>18</sub>FNO<sub>3</sub>S [M+Na]<sup>+</sup> 370.0889; found, 370.0887.

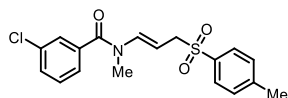

**(E)-3-chloro-N-methyl-N-(3-tosylprop-1-en-1-yl)benzamide (3k)**

Light yellow solid; 93 % yield; 67.5mg, mp: 128-129°C; <sup>1</sup>H NMR (400 MHz, CDCl<sub>3</sub>; δ, ppm) δ 7.73 (d, *J* = 8.0 Hz, 2H), 7.43 (d, *J* = 8.0 Hz, 1H), 7.37 (d, *J* = 8.0 Hz, 2H), 7.34-7.26 (m, 2H), 7.13 (s, 1H), 6.53 (s, 1H), 5.19-4.82 (m, 1H), 3.70 (s, 2H), 3.20 (s, 3H), 2.47 (s, 3H). <sup>13</sup>C NMR (100 MHz, CDCl<sub>3</sub>; δ, ppm) δ 168.8, 144.9, 136.1, 135.3, 134.8, 130.8, 129.8, 128.8, 128.5, 128.0, 125.9, 58.3, 21.7.; HR-MS (ESI-TOF, *m/z*) calcd for C<sub>18</sub>H<sub>18</sub>ClNO<sub>3</sub>S [M+Na]<sup>+</sup> 386.0594; found, 386.0588.

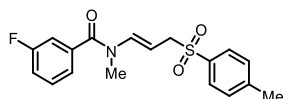

**(E)-3-fluoro-N-methyl-N-(3-tosylprop-1-en-1-yl)benzamide (3l)**

White solid; 64.5mg, 93 % yield; mp: 136-138°C; <sup>1</sup>H NMR (400 MHz, CDCl<sub>3</sub>; δ, ppm) δ 7.72 (d, *J* = 8.0 Hz, 2H), 7.42-7.30 (m, 3H), 7.20-7.11 (m, 1H), 7.05 (s, 1H), 6.97 (s, 1H), 6.52 (s, 1H), 5.10-4.88 (m, 1H), 3.70 (s, 2H), 3.20 (s, 3H), 2.47 (s, 3H); <sup>13</sup>C NMR (100 MHz, CDCl<sub>3</sub>; δ, ppm) δ 168.8, 162.4 (*J* = 247.3 Hz), 144.9, 136.4 (d, *J* = 7.0 Hz), 135.3, 130.4 (*J* = 8.0 Hz), 129.8, 128.5, 123.6, 117.8 (d, *J* = 20.9 Hz), 115.1 (*J* = 22.9 Hz), 96.3, 58.4, 41.0, 21.7; <sup>19</sup>F NMR (376 MHz, Chloroform-*d*) δ -111.09. HR-MS (ESI-TOF, *m/z*) calcd for C<sub>18</sub>H<sub>18</sub>FNO<sub>3</sub>S [M+Na]<sup>+</sup> 370.0889; found, 370.0890.

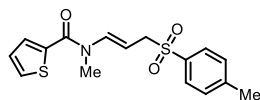

**(E)-N-methyl-N-(3-tosylprop-1-en-1-yl)thiophene-2-carboxamide (3m)**

White solid; 63mg, 94 % yield; mp: 136-137°C; <sup>1</sup>H NMR (400 MHz, CDCl<sub>3</sub>; δ, ppm) δ 7.76 (d, *J* = 8.4 Hz, 2H), 7.53 (dd, *J* = 4.8, 1.2 Hz, 1H), 7.37 (d, *J* = 8.0 Hz, 2H), 7.18-7.06 (m, 2H), 7.01 (dd, *J* = 5.2, 4.0 Hz, 1H), 5.09-4.91 (m, 1H), 3.77 (d, *J* = 7.6 Hz, 2H), 3.26 (s, 3H), 2.47 (s, 3H). <sup>13</sup>C NMR (100 MHz, CDCl<sub>3</sub>; δ, ppm) δ 163.4, 144.9, 136.5, 135.4, 131.2, 130.9, 129.9, 128.6, 127.1, 96.3, 58.4, 41.0, 21.7; HR-MS (ESI-TOF, *m/z*) calcd for C<sub>16</sub>H<sub>17</sub>NO<sub>3</sub>S<sub>2</sub> [M+Na]<sup>+</sup> 358.0548; found, 358.0546.

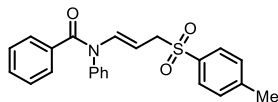

**(E)-N-phenyl-N-(3-tosylprop-1-en-1-yl)benzamide (3n)**

White solid; 63.3mg, 81 % yield; mp: 141-142°C; <sup>1</sup>H NMR (400 MHz, CDCl<sub>3</sub>; δ, ppm) δ 7.69 (d, *J* = 8.0 Hz, 2H), 7.40 (d, *J* = 14.4 Hz, 1H), 7.37-7.30 (m, 4H), 7.31-7.23 (m, 4H), 7.21-7.13 (m, 2H), 7.05 (d, *J* = 7.6 Hz, 2H), 4.70-4.49 (m, 1H), 3.75 (d, *J* = 8.0 Hz, 2H), 2.45 (s, 3H). <sup>13</sup>C NMR (100 MHz, CDCl<sub>3</sub>; δ, ppm) δ 168.9, 144.8, 139.1, 136.8, 135.5, 134.6, 130.4, 129.7(4), 129.7(0), 128.9, 128.6, 128.5, 128.4, 127.9, 100.3, 58.6, 21.7. HR-MS (ESI-TOF, *m/z*) calcd for C<sub>23</sub>H<sub>21</sub>NO<sub>3</sub>S [M+Na]<sup>+</sup> 414.114; found, 414.1120.

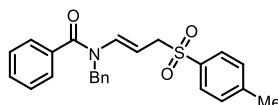

**(E)-N-benzyl-N-(3-tosylprop-1-en-1-yl)benzamide (3o)**

White solid; 74.5mg, 92 % yield; mp: 108-109°C; <sup>1</sup>H NMR (400 MHz, CDCl<sub>3</sub>; δ, ppm) δ 7.48-7.39 (m, 5H), 7.37 (d, *J* = 5.6 Hz, 1H), 7.33 (d, *J* = 7.6 Hz, 2H), 7.31-7.28 (m, 2H), 7.25-7.20 (m, 4H), 6.51 (s, 1H), 4.97 (s, 2H), 4.90-4.82 (m, 1H), 3.56 (d, *J* = 8.0 Hz, 2H), 2.45 (s, 3H). <sup>13</sup>C NMR (100 MHz, CDCl<sub>3</sub>; δ, ppm) δ 170.6, 144.5, 136.1, 134.9, 134.2, 130.9, 129.6, 128.9, 128.6(1), 128.5(6), 128.0, 127.5, 126.8, 58.6, 21.7; HR-MS (ESI-TOF, *m/z*) calcd for C<sub>24</sub>H<sub>23</sub>NO<sub>3</sub>S [M+Na]<sup>+</sup> 428.1296; found, 428.1289.

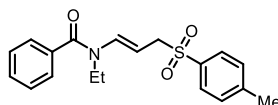

**(E)-N-ethyl-N-(3-tosylprop-1-en-1-yl)benzamide (3p)**

Light yellow solid; 61.7mg, 90 % yield; mp: 74-75 °C; <sup>1</sup>H NMR (400 MHz, CDCl<sub>3</sub>; δ, ppm) δ 7.72 (d, *J* = 7.6 Hz, 2H), 7.52-7.28 (m, 5H), 7.21 (s, 2H), 6.48 (s, 1H), 5.10-4.82 (m, 1H), 3.77 (s, 2H), 3.68 (d, *J* = 8.0 Hz, 2H), 2.48 (s, 3H), 1.21 (s, 3H). <sup>13</sup>C NMR (100 MHz, CDCl<sub>3</sub>; δ, ppm) δ 170.0, 144.8, 135.3, 134.6, 130.6, 129.8, 128.6, 128.5, 127.9, 95.1, 58.7, 38.5, 21.7, 12.0; HR-MS (ESI-TOF, *m/z*) calcd for C<sub>19</sub>H<sub>21</sub>NO<sub>3</sub>S [M+Na]<sup>+</sup> 366.1140; found, 366.1136.

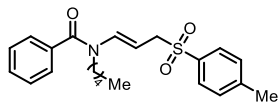

**(E)-N-pentyl-N-(3-(p-tolylsulfinyl)prop-1-en-1-yl)benzamide (3q)**

Light yellow oli, 68.5mg, 89 % yield; <sup>1</sup>H NMR (400 MHz, CDCl<sub>3</sub>; δ, ppm) δ 7.72 (d, *J* = 8.0 Hz, 2H), 7.43 (t, *J* = 7.6 Hz, 1H), 7.39-7.20 (m, 4H), 7.20 (d, *J* = 7.6 Hz, 2H), 6.47 (s, 1H), 5.00-4.82 (m, 1H), 3.79-3.59 (m, 2H), 2.49 (s, 3H), 1.66-1.54 (m, 2H), 1.37-1.23 (m, 4H), 0.92 (t, *J* = 6.8 Hz, 3H). <sup>13</sup>C NMR (100 MHz, CDCl<sub>3</sub>; δ, ppm) δ 170.2, 144.8, 135.3, 134.6, 130.6, 129.8, 128.6, 128.4, 127.9, 58.7, 29.7, 29.1, 26.4, 22.4, 21.7, 14.0. HR-MS (ESI-TOF, *m/z*) calcd for C<sub>22</sub>H<sub>27</sub>NO<sub>3</sub>S [M+Na]<sup>+</sup> 408.1609; found, 408.1616.

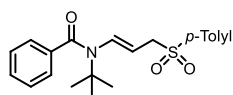

**(E)-N-(tert-butyl)-N-(3-tosylprop-1-en-1-yl)benzamide (3r)**

White solid; 59.4mg, 80 % yield; mp: 101-102°C; <sup>1</sup>H NMR (400 MHz, CDCl<sub>3</sub>; δ, ppm) δ 7.51-7.43 (m, 4H), 7.39-7.31 (m, 3H), 7.30-7.25 (m, 2H), 6.27 (d, *J* = 13.6 Hz, 1H), 4.82-4.65 (m, 1H), 3.52 (d, *J* = 8.0 Hz, 2H), 2.43 (s, 3H), 1.38 (s, 9H). <sup>13</sup>C NMR (100 MHz, CDCl<sub>3</sub>; δ, ppm) δ 171.8, 144.8, 137.6, 137.6, 135.4, 130.3, 129.9, 128.9, 128.2, 128.1, 117.5, 58.7, 57.6, 27.6, 21.6. R-MS (ESI-TOF, m/z) calcd for C<sub>21</sub>H<sub>25</sub>NO<sub>3</sub>S [M+Na]<sup>+</sup> 394.1453; found, 394.1461.

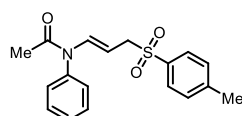

**(E)-N-phenyl-N-(3-tosylprop-1-en-1-yl)acetamide (3s)**

White solid; 59.8mg, 91 % yield; mp: 173-175°C; <sup>1</sup>H NMR (400 MHz, CDCl<sub>3</sub>; δ, ppm) δ 7.64 (d, *J* = 8.0 Hz, 2H), 7.55-7.40 (m, 4H), 7.32 (d, *J* = 8.0 Hz, 2H), 7.11 (d, *J* = 6.8 Hz, 2H), 4.39-4.22 (m, 1H), 3.71 (d, *J* = 7.6 Hz, 2H), 2.45 (s, 3H), 1.82 (s, 3H). <sup>13</sup>C NMR (100 MHz, CDCl<sub>3</sub>; δ, ppm) δ 168.8, 144.8, 138.9, 135.2(3), 135.2(8), 130.3, 129.7, 129.2, 128.6, 128.5, 99.2, 58.6, 23.1, 21.7; HR-MS (ESI-TOF, m/z) calcd for C<sub>18</sub>H<sub>19</sub>NO<sub>3</sub>S [M+Na]<sup>+</sup> 352.0983; found, 352.0979.

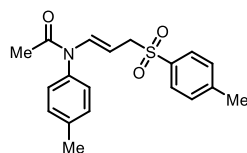

**(E)-N-(p-tolyl)-N-(3-tosylprop-1-en-1-yl)acetamide (3t)**

White solid; 63.8mg, 93 % yield; mp: 132-135°C; <sup>1</sup>H NMR (400 MHz, CDCl<sub>3</sub>; δ, ppm) 7.63 (d, *J* = 8.4 Hz, 2H), 7.41 (d, *J* = 14.4 Hz, 1H), 7.34-7.26 (m, 4H), 6.97 (d, *J* = 8.0 Hz, 2H), 4.38-4.27 (m, 1H), 3.71 (dd, *J* = 7.6, 1.2 Hz, 2H), 2.45 (s, 3H), 2.42 (s, 3H), 1.82 (s, 3H). <sup>13</sup>C NMR (100 MHz, CDCl<sub>3</sub>; δ, ppm) δ 169.0, 144.7, 139.3, 136.2, 135.2, 130.9, 129.6, 128.5, 128.2, 99.1, 58.6, 23.1, 21.7, 21.2; HR-MS (ESI-TOF, m/z) calcd for C<sub>19</sub>H<sub>21</sub>NO<sub>3</sub>S [M+Na]<sup>+</sup> 366.1140; found, 366.1136.

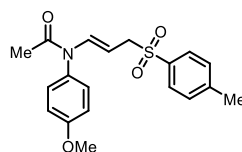

**(E)-N-(4-methoxyphenyl)-N-(3-tosylprop-1-en-1-yl)acetamide (3u)**

White solid; 65.3mg, 91 % yield; mp: 121-123°C; <sup>1</sup>H NMR (400 MHz, CDCl<sub>3</sub>; δ, ppm) δ 7.64 (d, *J* = 8.4 Hz, 2H), 7.43 (d, *J* = 14.0 Hz, 1H), 7.32 (d, *J* = 8.0 Hz, 2H), 7.05-6.95 (m, 4H), 4.38-4.28 (m, 1H), 3.86 (s, 3H), 3.72 (dd, *J* = 7.6, 1.0 Hz, 2H), 2.44 (s, 3H), 1.82 (s, 3H). <sup>13</sup>C NMR (100 MHz, CDCl<sub>3</sub>; δ, ppm) δ 169.2, 159.8, 144.7, 135.4, 135.2, 131.4, 129.6, 129.5, 128.5, 115.4, 99.0, 58.6, 55.5, 23.1, 21.6; HR-MS (ESI-TOF, m/z) calcd for C<sub>19</sub>H<sub>21</sub>NO<sub>4</sub>S [M+Na]<sup>+</sup> 382.1089; found, 382.1092.



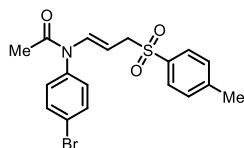

**(E)-N-(4-bromophenyl)-N-(3-tosylprop-1-en-1-yl)acetamide (3v)**

White solid; 70.8mg, 87% yield; mp: 147-148°C; <sup>1</sup>H NMR (400 MHz, CDCl<sub>3</sub>; δ, ppm) δ 7.64 (dd, *J* = 8.4, 2.0 Hz, 4H), 7.44 (d, *J* = 14.0 Hz, 1H), 7.33 (d, *J* = 8.0 Hz, 2H), 7.04-6.98 (m, 2H), 4.34-4.21 (m, 1H), 3.71 (dd, *J* = 7.6, 1.2 Hz, 2H), 2.45 (s, 3H), 1.84 (s, 3H). <sup>13</sup>C NMR (100 MHz, CDCl<sub>3</sub>; δ, ppm) δ 168.3, 144.9, 137.9, 135.3, 135.0, 133.7, 130.3, 129.7, 128.4, 123.3, 99.4, 58.4, 23.1, 21.7; HR-MS (ESI-TOF, *m/z*) calcd for C<sub>18</sub>H<sub>18</sub>BrNO<sub>3</sub>S [M+Na]<sup>+</sup> 430.0088; found, 430.0080.

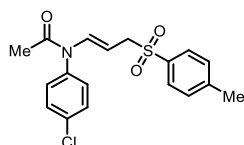

**(E)-N-(4-chlorophenyl)-N-(3-tosylprop-1-en-1-yl)acetamide (3w)**

White solid; 60.2mg, 83 % yield; mp: 129-131°C; <sup>1</sup>H NMR (400 MHz, CDCl<sub>3</sub>; δ, ppm) δ 7.67-7.61 (m, 2H), 7.54-7.38 (m, 3H), 7.33 (d, *J* = 8.0 Hz, 2H), 7.10-7.03 (m, 2H), 4.34-4.25 (m, 1H), 3.71 (dd, *J* = 8.0, 1.2 Hz, 2H), 2.45 (s, 3H), 1.84 (s, 3H). <sup>13</sup>C NMR (100 MHz, CDCl<sub>3</sub>; δ, ppm) δ 168.4, 144.9, 137.4, 135.3, 135.1, 130.7, 130.0, 129.7, 128.4, 99.4, 58.4, 23.1, 21.7; HR-MS (ESI-TOF, *m/z*) calcd for C<sub>18</sub>H<sub>18</sub>ClNO<sub>3</sub>S [M+Na]<sup>+</sup> 386.0594; found, 386.0585.

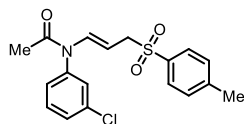

**(E)-N-(3-chlorophenyl)-N-(3-tosylprop-1-en-1-yl)acetamide (3x)**

White solid; 59.5mg, 82 % yield; mp: 159-160°C; <sup>1</sup>H NMR (400 MHz, CDCl<sub>3</sub>; δ, ppm) δ 7.64 (d, *J* = 8.0 Hz, 2H), 7.49-7.38 (m, 3H), 7.34 (d, *J* = 8.0 Hz, 2H), 7.11 (s, 1H), 7.07-6.99 (m, 1H), 4.38-4.22 (m, 1H), 3.82-3.61 (m, 2H), 2.46 (s, 3H), 1.86 (s, 3H). <sup>13</sup>C NMR (100 MHz, CDCl<sub>3</sub>; δ, ppm) δ 168.3, 144.9, 140.0, 135.8, 135.2, 135.0, 131.3, 129.7, 129.6, 129.0, 128.5, 127.0, 99.7, 58.5, 23.1, 21.7; HR-MS (ESI-TOF, *m/z*) calcd for C<sub>18</sub>H<sub>18</sub>ClNO<sub>3</sub>S [M+Na]<sup>+</sup> 386.0594; found, 386.0589.

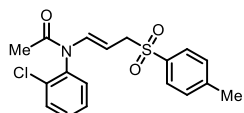

**(E)-N-(2-chlorophenyl)-N-(3-tosylprop-1-en-1-yl)acetamide (3y)**

White solid; 62.4mg, 86 % yield; mp: 151-152°C; <sup>1</sup>H NMR (400 MHz, CDCl<sub>3</sub>; δ, ppm) δ 7.65 (d, *J* = 8.4 Hz, 2H), 7.61-7.55 (m, 1H), 7.49-7.40 (m, 2H), 7.35 (d, *J* = 14.4 Hz, 1H), 7.31 (d, *J* = 8.0 Hz, 2H), 7.25-7.16 (m, 1H), 4.30-4.21 (m, 1H), 3.73 (dd, *J* = 8.0, 1.2 Hz, 2H), 2.44 (s, 3H), 1.81 (s, 3H). <sup>13</sup>C NMR (100 MHz, CDCl<sub>3</sub>; δ, ppm) δ 168.4, 144.8, 136.2, 134.9, 133.5, 133.3, 131.2, 130.8, 130.6, 129.6, 128.8, 128.6, 98.7, 58.5, 22.5, 21.7; HR-MS (ESI-TOF, *m/z*) calcd for C<sub>18</sub>H<sub>18</sub>ClNO<sub>3</sub>S [M+Na]<sup>+</sup> 386.0594; found, 386.0589.

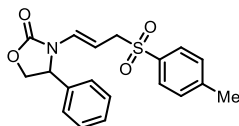

**(E)-4-phenyl-3-(3-tosylprop-1-en-1-yl)oxazolidin-2-one (3z)**

Clear oil; 43.6mg, 61% yield; <sup>1</sup>H NMR (400 MHz, CDCl<sub>3</sub>; δ, ppm) δ 7.51-7.40 (m, 3H), 7.37 (d, *J* = 8.0 Hz, 2H), 7.26-7.19 (m, 4H), 6.58 (d, *J* = 14.4 Hz, 1H), 5.00 (dd, *J* = 9.2, 5.2 Hz, 1H), 4.72 (t, *J* = 8.8 Hz, 1H), 4.65-4.50 (m, 1H), 4.14 (dd, *J* = 9.2, 5.2 Hz, 1H), 3.74-3.53 (m, 2H), 2.43 (s, 3H). <sup>13</sup>C NMR (100 MHz, CDCl<sub>3</sub>; δ, ppm) δ 155.3, 144.7, 137.5, 134.9, 130.0, 129.7, 129.6, 129.2, 128.3, 126.1, 98.4, 70.8, 58.4, 58.2, 21.7. HR-MS (ESI-TOF, *m/z*) calcd for C<sub>19</sub>H<sub>19</sub>NO<sub>4</sub>S [M+Na]<sup>+</sup> 380.0932; found, 380.0937.

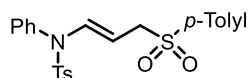

**(E)-4-methyl-N-phenyl-N-(3-tosylprop-1-en-1-yl)benzenesulfonamide (3aa)**

Clear oil; 70.6mg, 80% yield; <sup>1</sup>H NMR (400 MHz, CDCl<sub>3</sub>; δ, ppm) δ 7.61 (d, *J* = 8.4 Hz, 2H), 7.45 (d, *J* = 8.4 Hz, 2H), 7.41-7.33 (m, 3H), 7.30 (d, *J* = 8.0 Hz, 2H), 7.25 (d, *J* = 7.6 Hz, 2H), 7.03 (d, *J* = 14.0 Hz, 1H), 6.89-6.84 (m, 2H), 4.26-4.14 (m, 1H), 3.67 (d, *J* = 7.6 Hz, 2H), 2.46 (s, 3H), 2.44 (s, 3H). <sup>13</sup>C NMR (100 MHz, CDCl<sub>3</sub>; δ, ppm) δ 144.7, 144.4, 136.5, 135.5, 135.26, 135.2, 130.0, 129.7, 129.7, 129.5, 128.5, 127.5, 96.3, 77.3, 58.2, 21.7, 21.7. HR-MS (ESI-TOF, *m/z*) calcd for C<sub>23</sub>H<sub>23</sub>NO<sub>4</sub>S<sub>2</sub> [M+Na]<sup>+</sup> 464.0966; found, 464.0972.

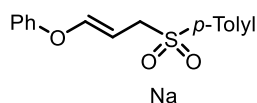

**(E)-1-methyl-4-((3-phenoxyallyl)sulfonyl)benzene (3ab)**

White solid; 41.5mg, 72% yield; mp: 96-97°C <sup>1</sup>H NMR (400 MHz, CDCl<sub>3</sub>; δ, ppm) δ 7.78 (d, *J* = 8.4 Hz, 2H), 7.38 (d, *J* = 8.0 Hz, 2H), 7.33-7.25 (m, 2H), 7.09 (t, *J* = 7.6 Hz, 1H), 6.83 (d, *J* = 7.6 Hz, 2H), 6.45 (d, *J* = 12.4 Hz, 1H), 5.27-5.14 (m, 1H), 3.74 (d, *J* = 9.2 Hz, 2H), 2.47 (s, 3H). <sup>13</sup>C NMR (100 MHz, CDCl<sub>3</sub>; δ, ppm) δ 156.4, 149.7, 144.8, 135.2, 129.8, 129.7, 128.7, 123.7, 117.1, 98.4, 56.1, 21.7. HR-MS (ESI-TOF, *m/z*) calcd for C<sub>16</sub>H<sub>16</sub>O<sub>3</sub>S [M+Na]<sup>+</sup> 311.0718.0966; found, 311.0725.

**Characterization Data of Compounds 4a-4j**

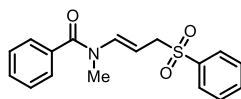

**(E)-N-methyl-N-(3-(phenylsulfonyl)prop-1-en-1-yl)benzamide (4a)**

White solid; 59.2mg, 94 % yield; mp: 135-137 °C; <sup>1</sup> H NMR (400 MHz, CDCl<sub>3</sub>; δ, ppm) δ 7.86 (d, *J* = 7.6 Hz, 2H), 7.69 (t, *J* = 7.6 Hz, 1H), 7.58 (t, *J* = 8.0 Hz, 2H), 7.45 (t, *J* = 7.6 Hz, 1H), 7.36 (t, *J* = 7.6 Hz, 2H), 7.31-7.18 (m, 2H), 6.62 (s, 1H), 5.10-4.79 (m, 1H), 3.72 (s, 2H), 3.20 (s, 3H). <sup>13</sup>C NMR

(100 MHz, CDCl<sub>3</sub>;  $\delta$ , ppm)  $\delta$  170.4, 138.3, 134.3, 133.8, 130.7, 129.2, 128.5, 128.5, 128.0, 58.4. HR-MS (ESI-TOF, m/z) calcd for C<sub>17</sub>H<sub>17</sub>NO<sub>3</sub>S [M+H]<sup>+</sup> 316.1007; found, 316.1006.

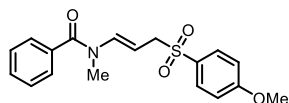

**(E)-N-(3-((4-methoxyphenyl)sulfonyl)prop-1-en-1-yl)-N-methylbenzamide (4b)**

White solid; 64.2mg, 93% yield; mp 154-156°C; <sup>1</sup>H NMR (400 MHz, CDCl<sub>3</sub>;  $\delta$ , ppm)  $\delta$  7.77 (d, *J* = 8.8 Hz, 2H), 7.49-7.41 (m, 1H), 7.37 (t, *J* = 7.6 Hz, 2H), 7.31-7.23 (m, 2H), 7.08-6.98 (m, 2H), 6.58 (s, 1H), 5.05-4.85 (m, 1H), 3.91 (s, 3H), 3.78-3.57 (m, 2H), 3.21 (s, 3H). <sup>13</sup>C NMR (100 MHz, CDCl<sub>3</sub>;  $\delta$ , ppm)  $\delta$  170.4, 163.8, 134.3, 130.7(1), 130.6(8), 129.7, 128.5, 128.5, 128.0, 114.3, 58.6, 55.8. HR-MS (ESI-TOF, m/z) calcd for C<sub>18</sub>H<sub>19</sub>NO<sub>4</sub>S [M+Na]<sup>+</sup> 368.0932; found, 368.0931.

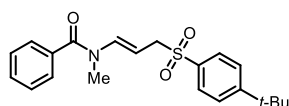

**(E)-N-(3-((4-tert-butylphenyl)sulfonyl)prop-1-en-1-yl)-N-methylbenzamide (4c)**

White solid; 40.1mg, 54 % yield; mp: 133-135°C; <sup>1</sup>H NMR (400 MHz, CDCl<sub>3</sub>;  $\delta$ , ppm)  $\delta$  7.78 (d, *J* = 8.4 Hz, 2H), 7.61-7.54 (m, 2H), 7.49-7.42 (m, 1H), 7.38 (t, *J* = 7.6 Hz, 2H), 7.34-7.25 (m, 2H), 6.71 (s, 1H), 5.06-4.89 (m, 1H), 3.71 (d, *J* = 7.6 Hz, 2H), 3.21 (s, 3H), 1.36 (s, 9H). <sup>13</sup>C NMR (100 MHz, CDCl<sub>3</sub>;  $\delta$ , ppm)  $\delta$  170.3, 157.8, 135.5, 134.4, 130.7, 128.5, 128.3, 128.0, 126.2, 58.5, 35.3, 31.1; HR-MS (ESI-TOF, m/z) calcd for C<sub>21</sub>H<sub>25</sub>NO<sub>3</sub>S [M+Na]<sup>+</sup> 394.1453; found, 394.1447.

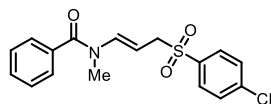

**(E)-N-(3-((4-chlorophenyl)sulfonyl)prop-1-en-1-yl)-N-methylbenzamide (4d)**

White solid; 41.2mg, 59 % yield; mp: 137-140°C; <sup>1</sup>H NMR (400 MHz, CDCl<sub>3</sub>;  $\delta$ , ppm)  $\delta$  8.16 (d, *J* = 8.4 Hz, 2H), 8.01-7.91 (m, 2H), 7.88-7.81 (m, 1H), 7.80-7.73 (m, 2H), 7.69-7.60 (m, 2H), 6.98 (s, 1H), 5.49-5.13 (m, 1H), 4.19-3.99 (m, 2H), 3.58 (s, 3H). <sup>13</sup>C NMR (100 MHz, CDCl<sub>3</sub>;  $\delta$ , ppm)  $\delta$  170.4, 140.6, 136.7, 134.2, 130.8, 130.0, 129.5, 128.6, 127.9, 58.4. HR-MS (ESI-TOF, m/z) calcd for C<sub>17</sub>H<sub>16</sub>ClNO<sub>3</sub>S [M+Na]<sup>+</sup> 372.0437; found, 372.0437.

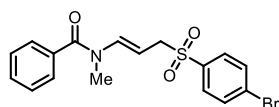

**(E)-N-(3-((4-bromophenyl)sulfonyl)prop-1-en-1-yl)-N-methylbenzamide (4e)**

White solid; 62.9mg, 80 % yield; mp: 127-128°C; <sup>1</sup>H NMR (400 MHz, CDCl<sub>3</sub>;  $\delta$ , ppm)  $\delta$  7.76-7.67 (m, 4H), 7.50-7.44 (m, 1H), 7.40 (t, *J* = 7.6 Hz, 2H), 7.33-7.19 (m, 2H), 6.61 (s, 1H), 5.01-4.85 (m, 1H), 3.71 (s, 2H), 3.21 (s, 3H). <sup>13</sup>C NMR (100 MHz, CDCl<sub>3</sub>;  $\delta$ , ppm)  $\delta$  170.4, 137.2, 134.2, 132.5, 130.8, 130.4, 130.1, 129.4, 129.2, 128.6, 127.9, 58.4, 41.0. HR-MS (ESI-TOF, m/z) calcd for C<sub>17</sub>H<sub>16</sub>BrNO<sub>3</sub>S [M+Na]<sup>+</sup> 415.9932; found, 415.9930.

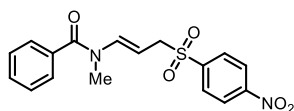

**(E)-N-methyl-N-(3-((4-nitrophenyl)sulfonyl)prop-1-en-1-yl)benzamide (4f)**

Light yellow solid; 62.6mg, 87 % yield; mp: 169-171°C; <sup>1</sup>H NMR (400 MHz, CDCl<sub>3</sub>; δ, ppm) δ 8.41 (t, *J* = 8.0 Hz, 2H), 8.06 (d, *J* = 8.0 Hz, 2H), 7.46 (t, *J* = 8.0 Hz, 1H), 7.38 (t, *J* = 8.0 Hz, 2H), 7.31 (d, *J* = 8.0 Hz, 2H), 6.82 (s, 1H), 5.00-4.85 (m, 1H), 3.80 (s, 2H), 3.20 (s, 3H); <sup>13</sup>C NMR (100 MHz, CDCl<sub>3</sub>; δ, ppm) δ 170.4, 151.9, 150.9, 144.1, 134.1, 130.9, 130.0, 128.6, 127.9, 124.3, 95.1, 58.4, 26.1; HR-MS (ESI-TOF, *m/z*) calcd for C<sub>17</sub>H<sub>16</sub>N<sub>2</sub>O<sub>5</sub>S [M+Na]<sup>+</sup> 383.0678; found, 383.0668.

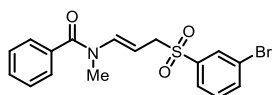

**(E)-N-(3-((3-bromophenyl)sulfonyl)prop-1-en-1-yl)-N-methylbenzamide (4g)**

White solid; 50.3mg, 64 % yield; mp: 174-175 °C; <sup>1</sup>H NMR (400 MHz, CDCl<sub>3</sub>; δ, ppm) δ 8.13-7.91 (m, 1H), 7.80 (t, *J* = 8.0 Hz, 2H), 7.65-7.17 (m, 7H), 6.67 (s, 1H), 5.02-4.82 (m, 1H), 3.74 (s, 2H), 3.21 (s, 3H), <sup>13</sup>C NMR (100 MHz, CDCl<sub>3</sub>; δ, ppm) δ 170.4, 140.1, 136.9, 134.3, 131.5, 130.8, 130.7, 128.6, 127.9, 127.1, 123.2, 94.7, 58.5, 40.9; HR-MS (ESI-TOF, *m/z*) calcd for C<sub>17</sub>H<sub>16</sub>BrNO<sub>3</sub>S [M+Na]<sup>+</sup> 415.9932; found, 415.9929.

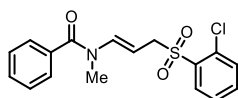

**(E)-N-(3-((2-chlorophenyl)sulfonyl)prop-1-en-1-yl)-N-methylbenzamide (4h)**

White solid; 62.1mg, 89% yield; mp: 137-140°C; <sup>1</sup>H NMR (400 MHz, CDCl<sub>3</sub>; δ, ppm) δ 8.07-8.02 (m, 1H), 7.61-7.50 (m, 2H), 7.49-7.42 (m, 2H), 7.39 (t, *J* = 8.0 Hz, 2H), 7.26 (d, *J* = 4.0 Hz, 2H), 6.74 (s, 1H), 5.00-4.81 (m, 1H), 4.04 (s, 2H), 3.11 (s, 3H); <sup>13</sup>C NMR (100 MHz, CDCl<sub>3</sub>; δ, ppm) δ 170.3, 136.0, 134.9, 134.3, 132.6, 132.2, 131.8, 130.8, 128.6, 127.9, 127.4, 94.6, 56.4, 41.0; HR-MS (ESI-TOF, *m/z*) calcd for C<sub>17</sub>H<sub>16</sub>ClNO<sub>3</sub>S [M+Na]<sup>+</sup> 372.0437; found, 372.0430.

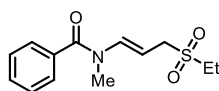

**(E)-N-(3-(ethylsulfonyl)prop-1-en-1-yl)-N-methylbenzamide (4i)**

Light yellow oil; 50.2mg, 94 % yield; <sup>1</sup>H NMR (400 MHz, CDCl<sub>3</sub>; δ, ppm) δ 7.63-7.03 (m, 6H), 5.08-4.88 (m, 1H), 3.62 (s, 2H), 3.22 (s, 3H), 3.02-2.87 (m, 2H), 1.34 (t, *J* = 8.0 Hz, 3H). <sup>13</sup>C NMR (100 MHz, CDCl<sub>3</sub>; δ, ppm) δ 170.5, 134.5, 133.0, 130.8, 128.6, 128.0, 113.2, 54.2, 45.6, 29.7, 14.1; HR-MS (ESI-TOF, *m/z*) calcd for C<sub>13</sub>H<sub>17</sub>NO<sub>3</sub>S [M+Na]<sup>+</sup> 290.0827; found, 290.0824.

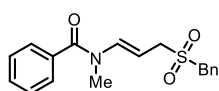

**(E)-N-(3-(benzylsulfonyl)prop-1-en-1-yl)-N-methylbenzamide (4j)**

Light yellow oil; 59.2mg, 90 % yield;  $^1\text{H}$  NMR (400 MHz,  $\text{CDCl}_3$ ;  $\delta$ , ppm)  $\delta$  7.52-7.44 (m, 6H), 7.35 (s, 5H), 5.04-4.78 (m, 1H), 4.21 (s, 2H), 3.51 (s, 2H), 3.22 (s, 3H);  $^{13}\text{C}$  NMR (100 MHz,  $\text{CDCl}_3$ ;  $\delta$ , ppm)  $\delta$  170.4, 134.5, 130.8, 130.7, 129.1, 129.1, 128.7, 127.9, 127.9, 126.9, 58.2, 53.5, 29.7; HR-MS (ESI-TOF, m/z) calcd for  $\text{C}_{18}\text{H}_{19}\text{NO}_3\text{S}$   $[\text{M}+\text{Na}]^+$  352.0983 ; found, 352.0976.

### Copies of $^1\text{H}$ , $^{13}\text{C}$ NMR and $^{19}\text{F}$ NMR Spectra of Products 3a-3z and 3aa-3ab

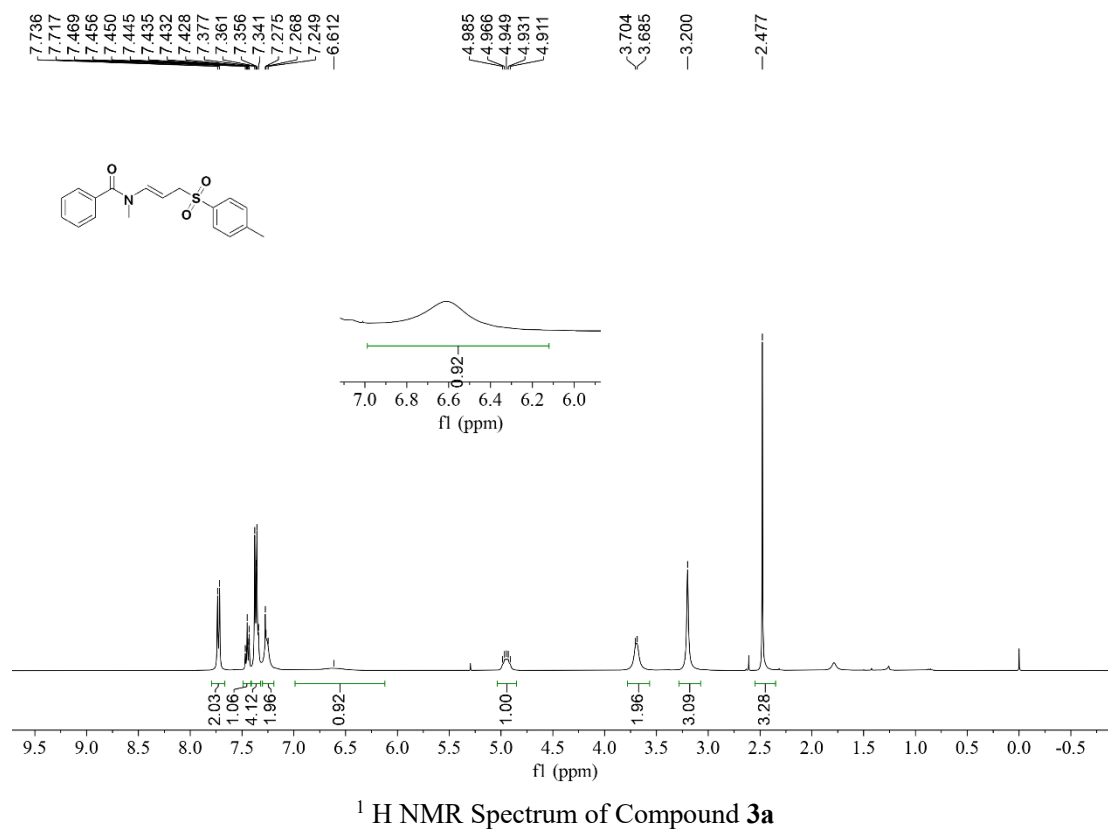

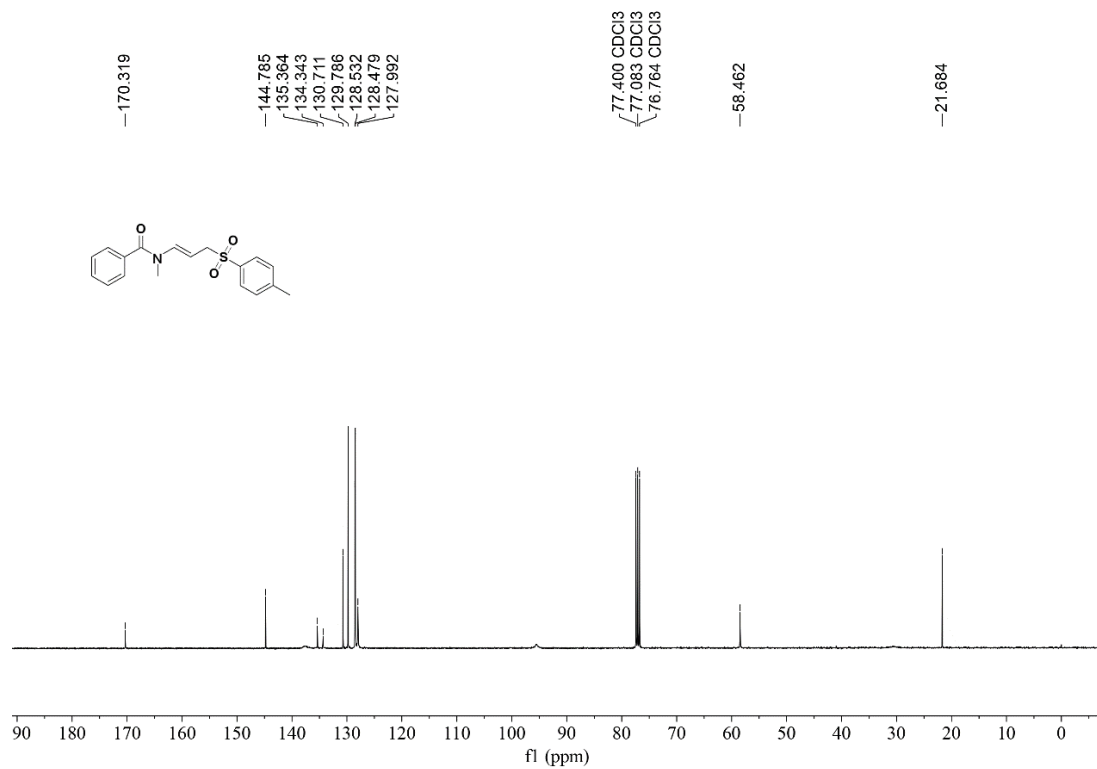

<sup>13</sup>C NMR Spectrum of Compound **3a**

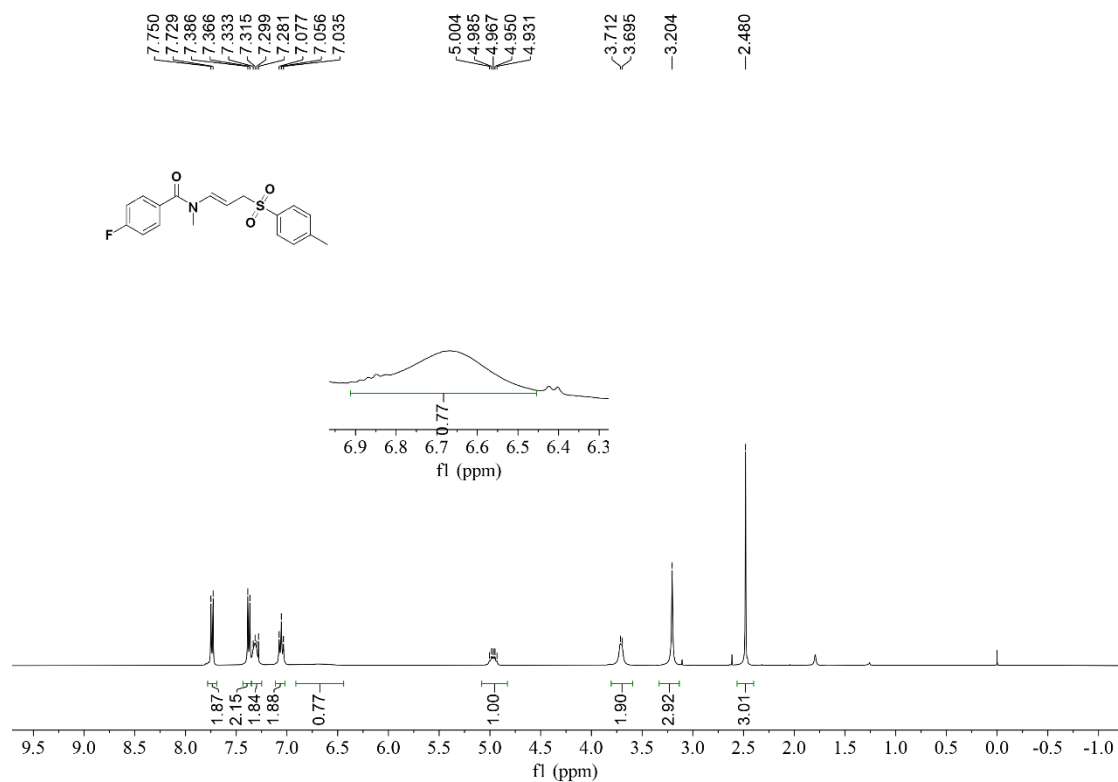

<sup>1</sup>H NMR Spectrum of Compound **3b**

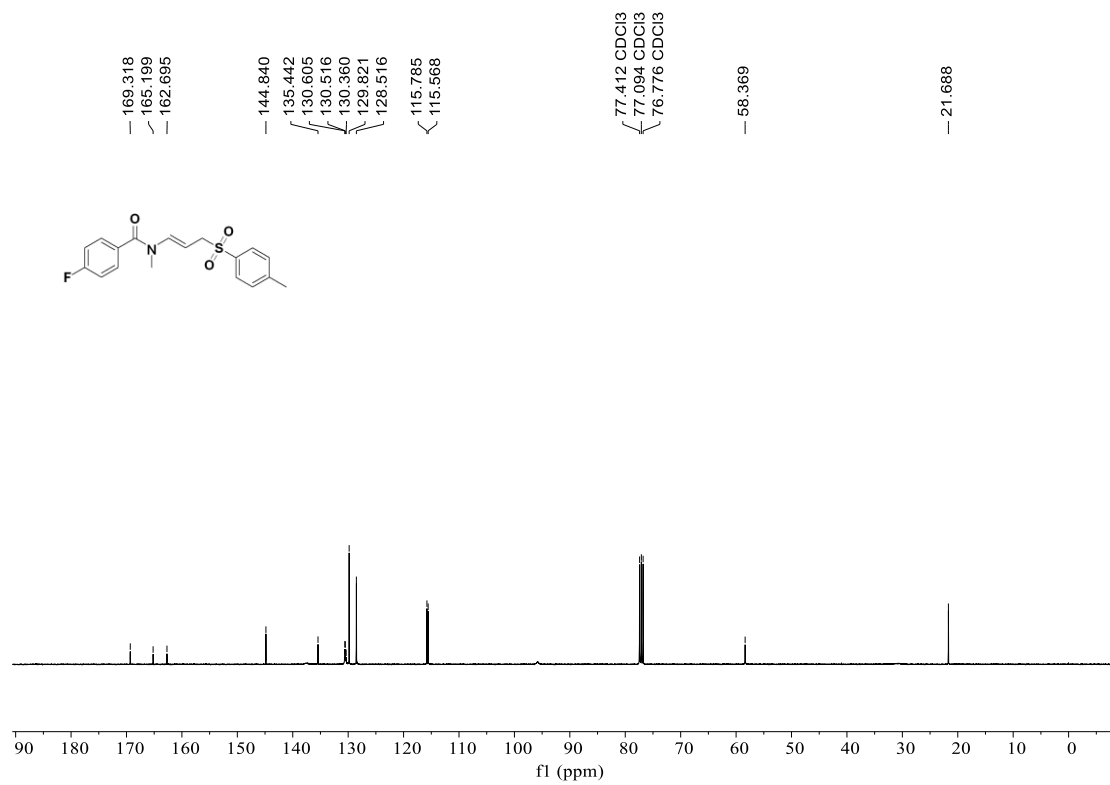

<sup>13</sup>C NMR Spectrum of Compound **3b**

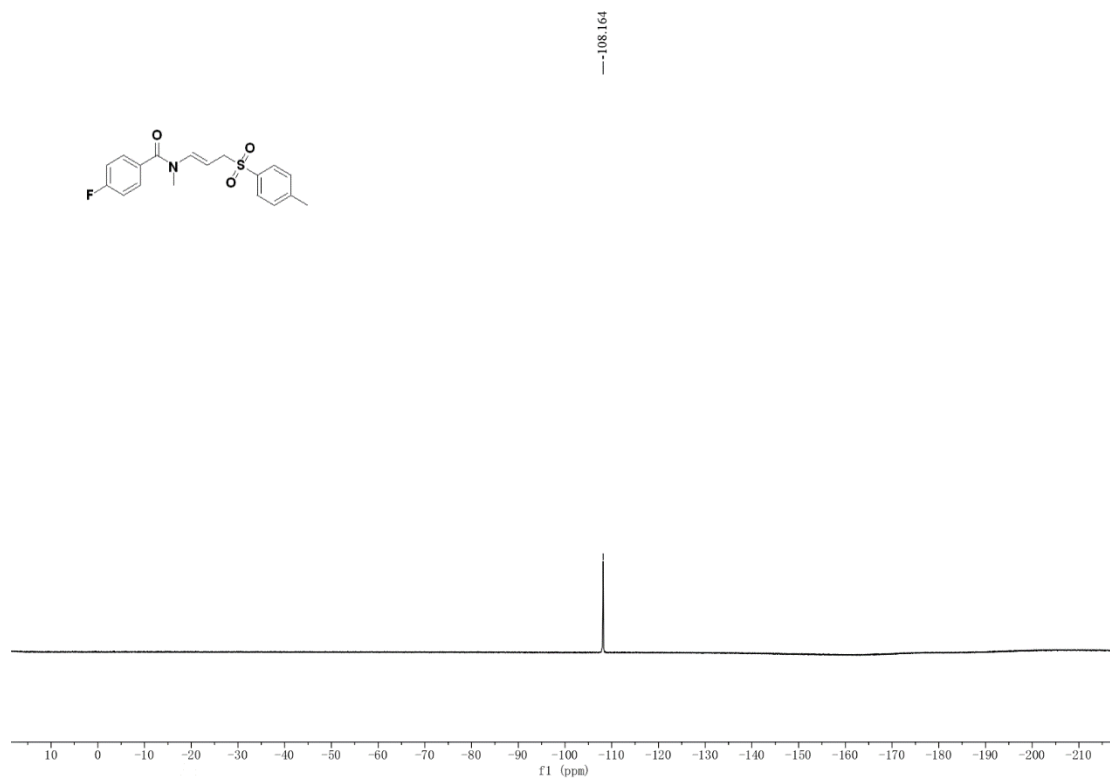

<sup>19</sup>F NMR Spectrum of Compound **3b**

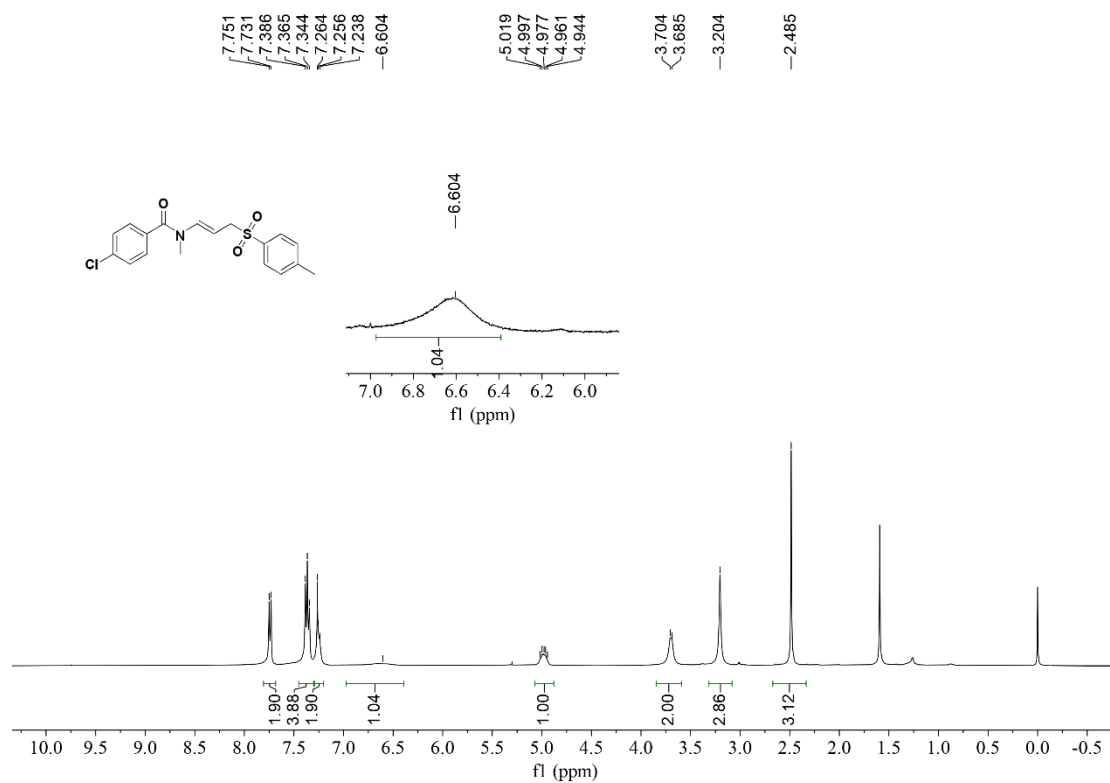

<sup>1</sup>H NMR Spectrum of Compound 3c

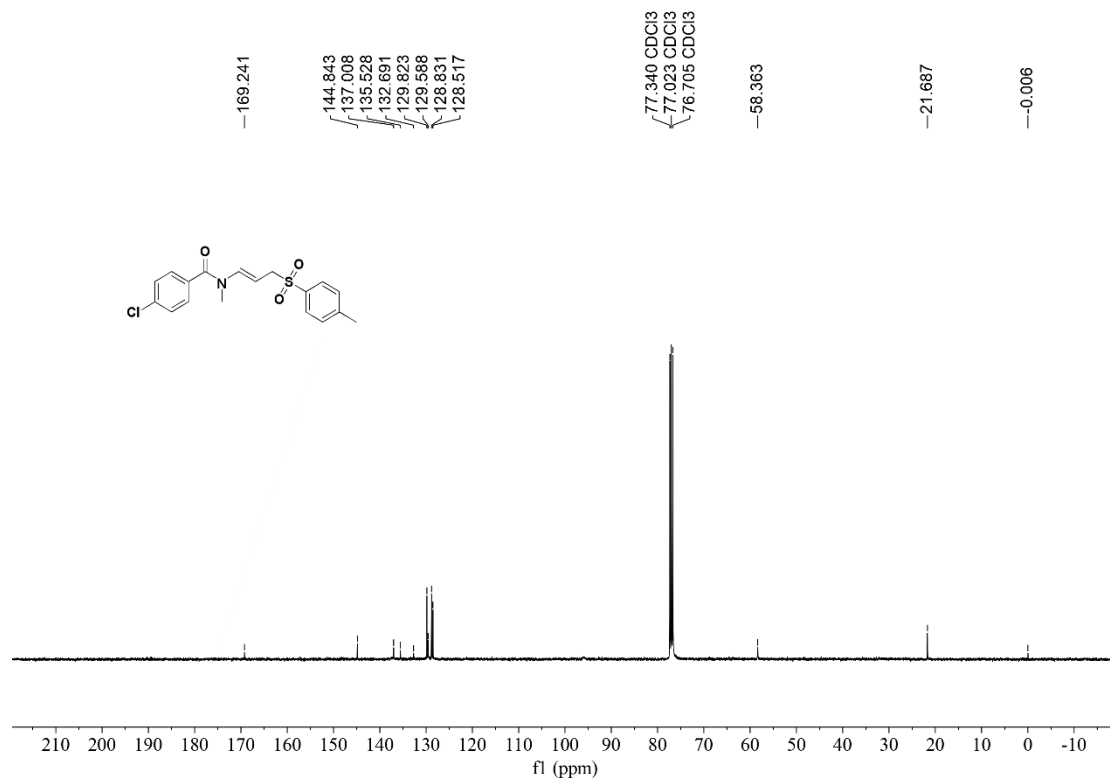

<sup>13</sup>C NMR Spectrum of Compound 3c



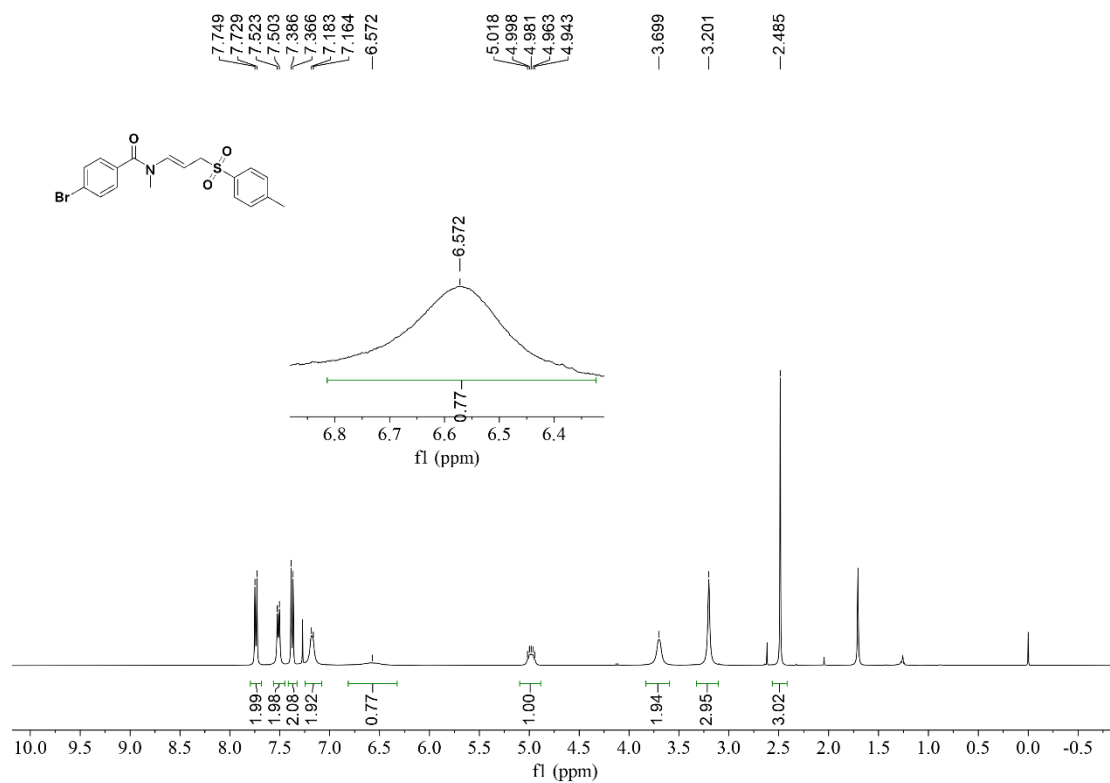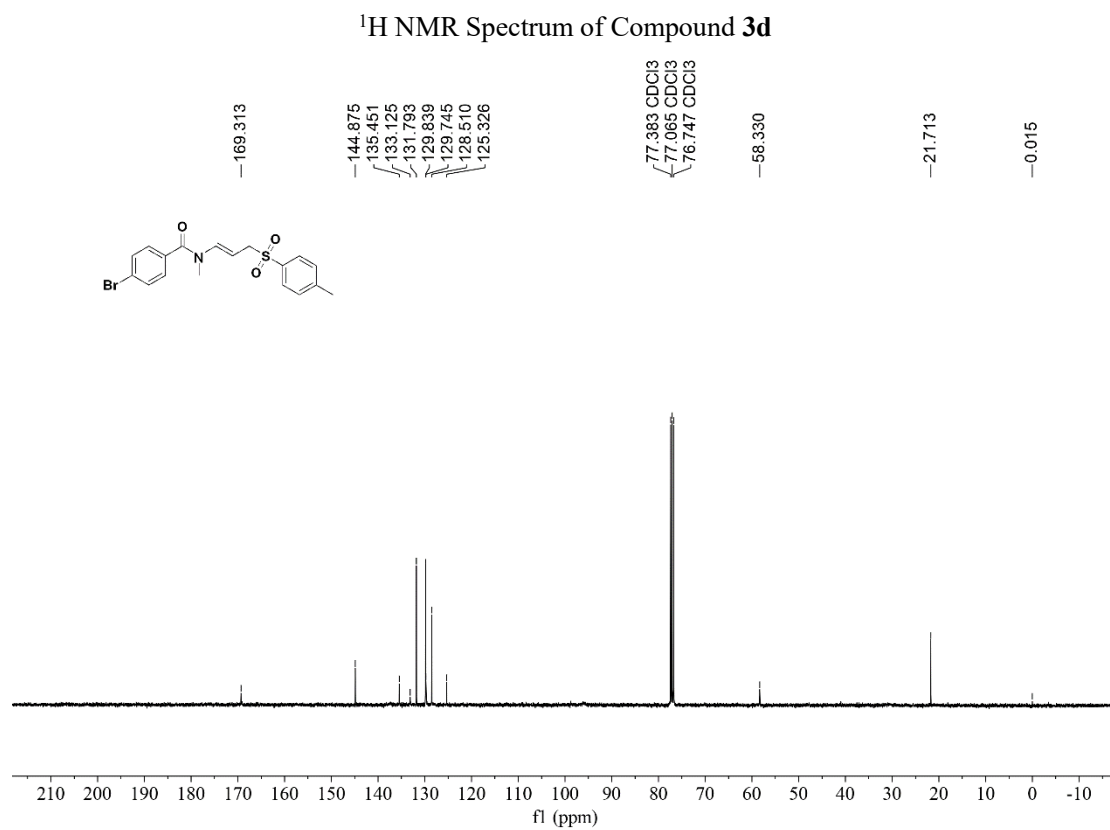

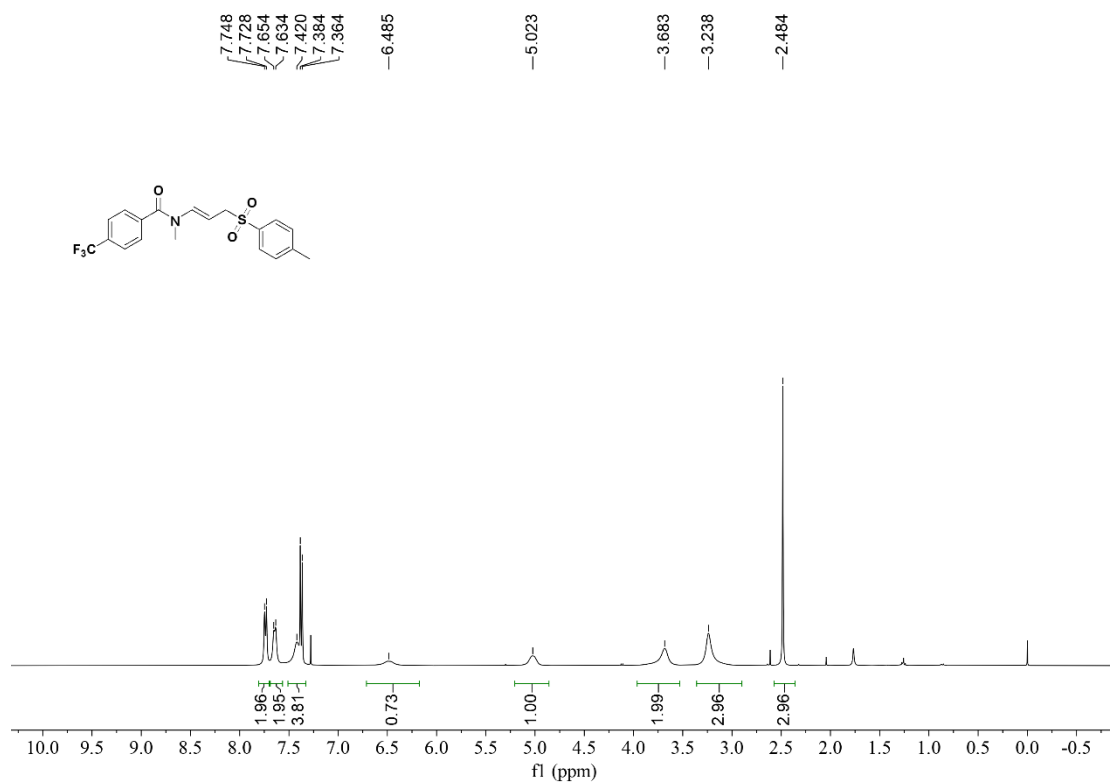

<sup>1</sup>H NMR Spectrum of Compound **3e**

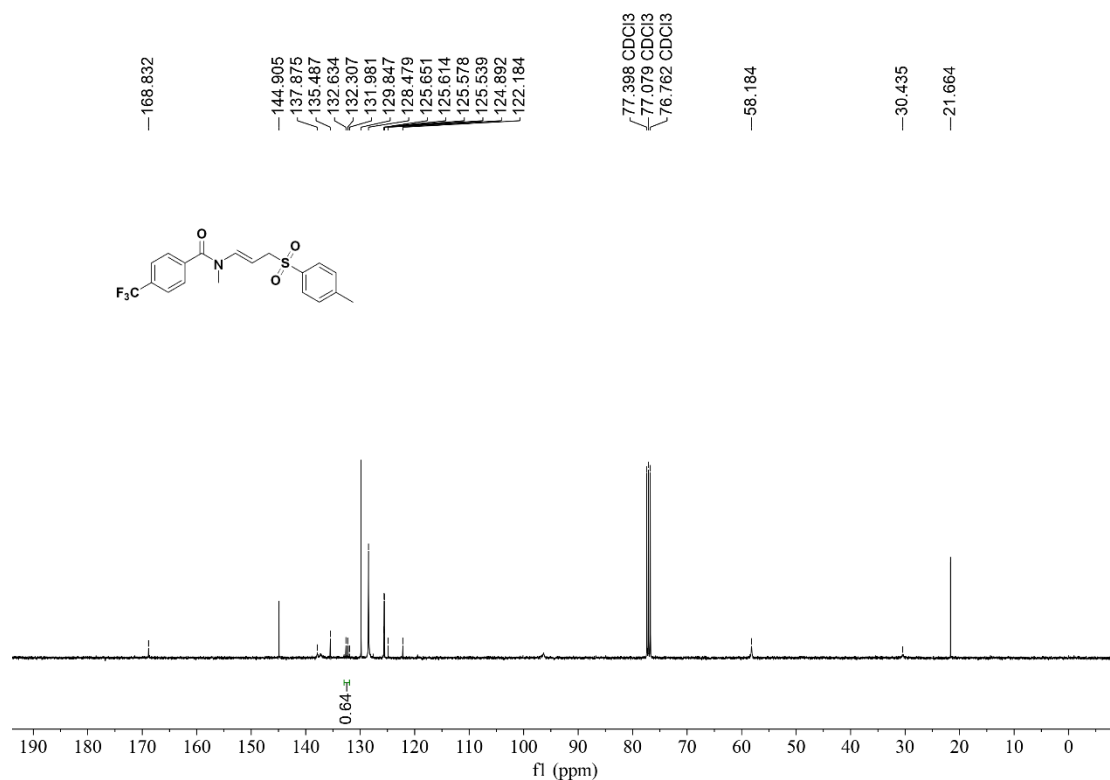

<sup>13</sup>C NMR Spectrum of Compound **3e**

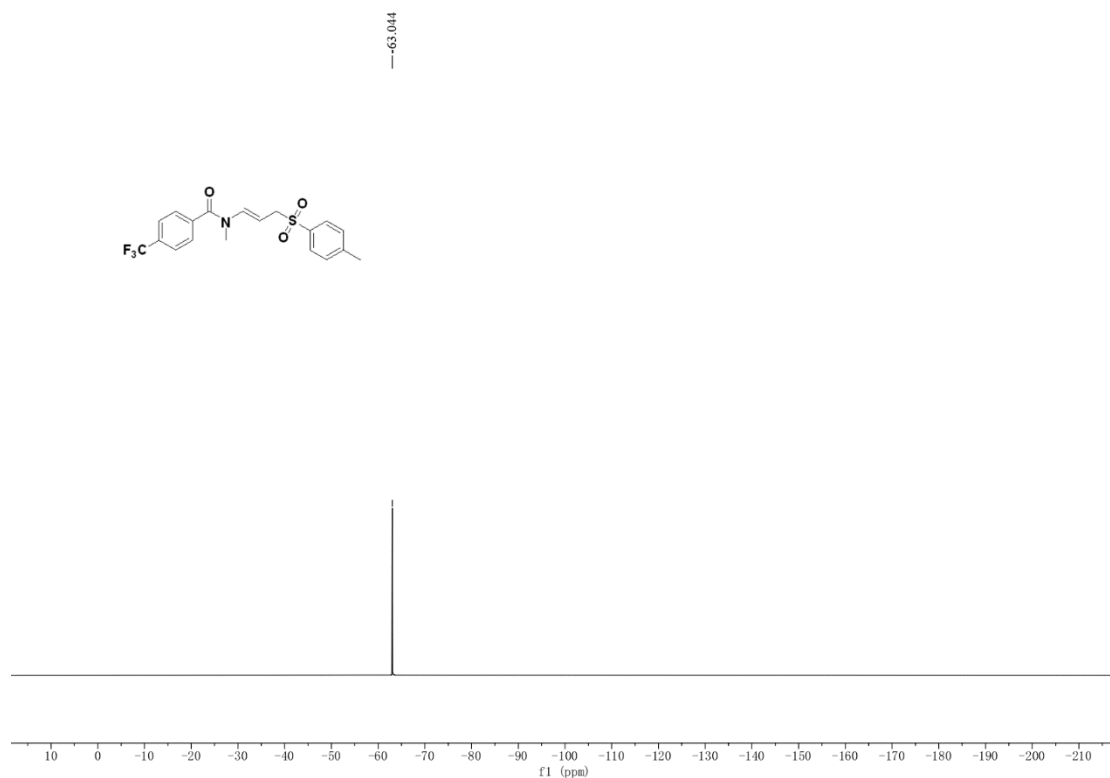

<sup>19</sup>F NMR Spectrum of Compound **3e**

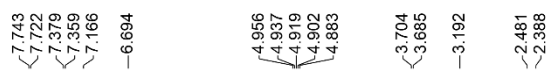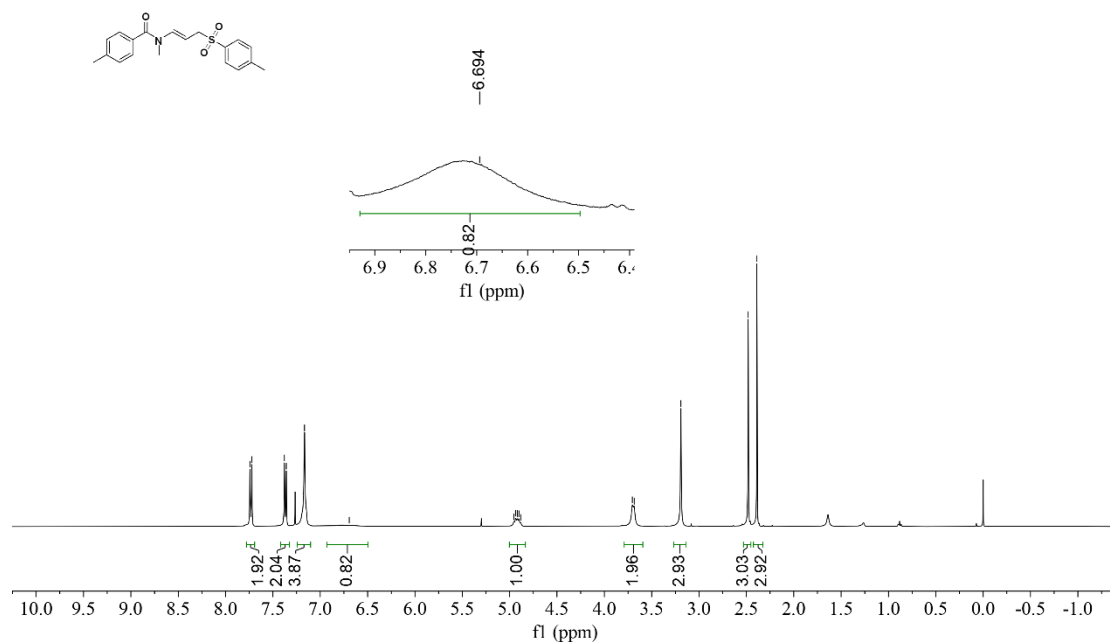

<sup>1</sup>H NMR Spectrum of Compound **3f**

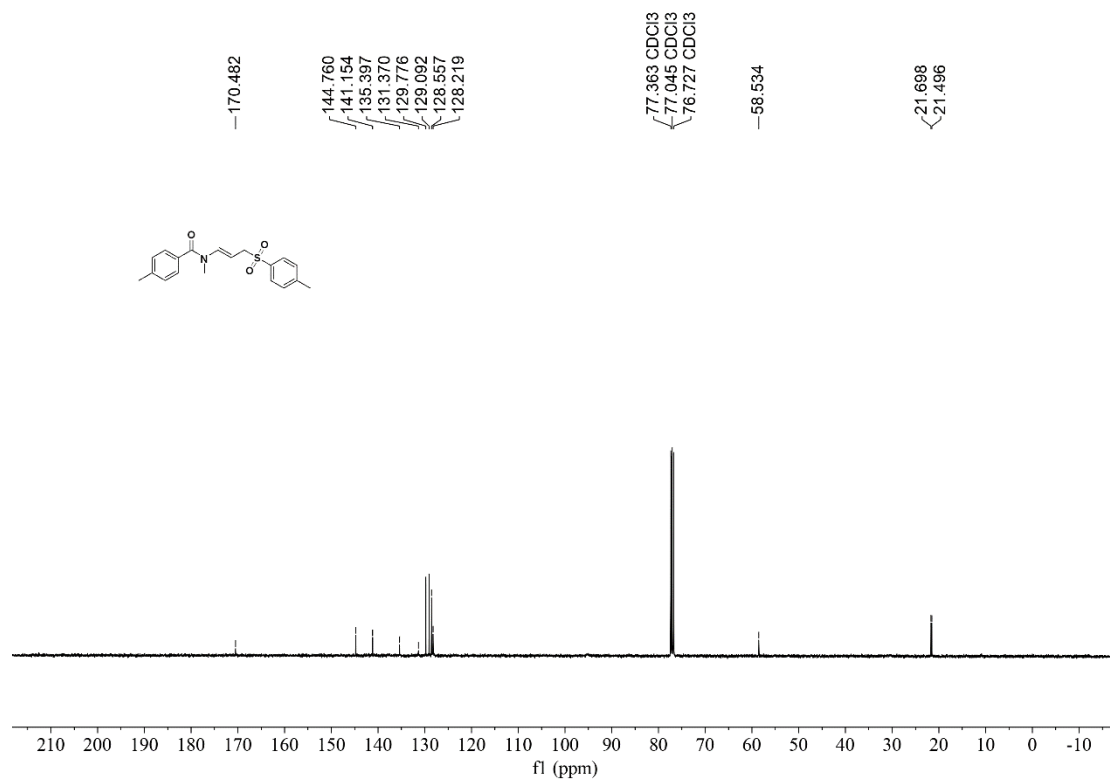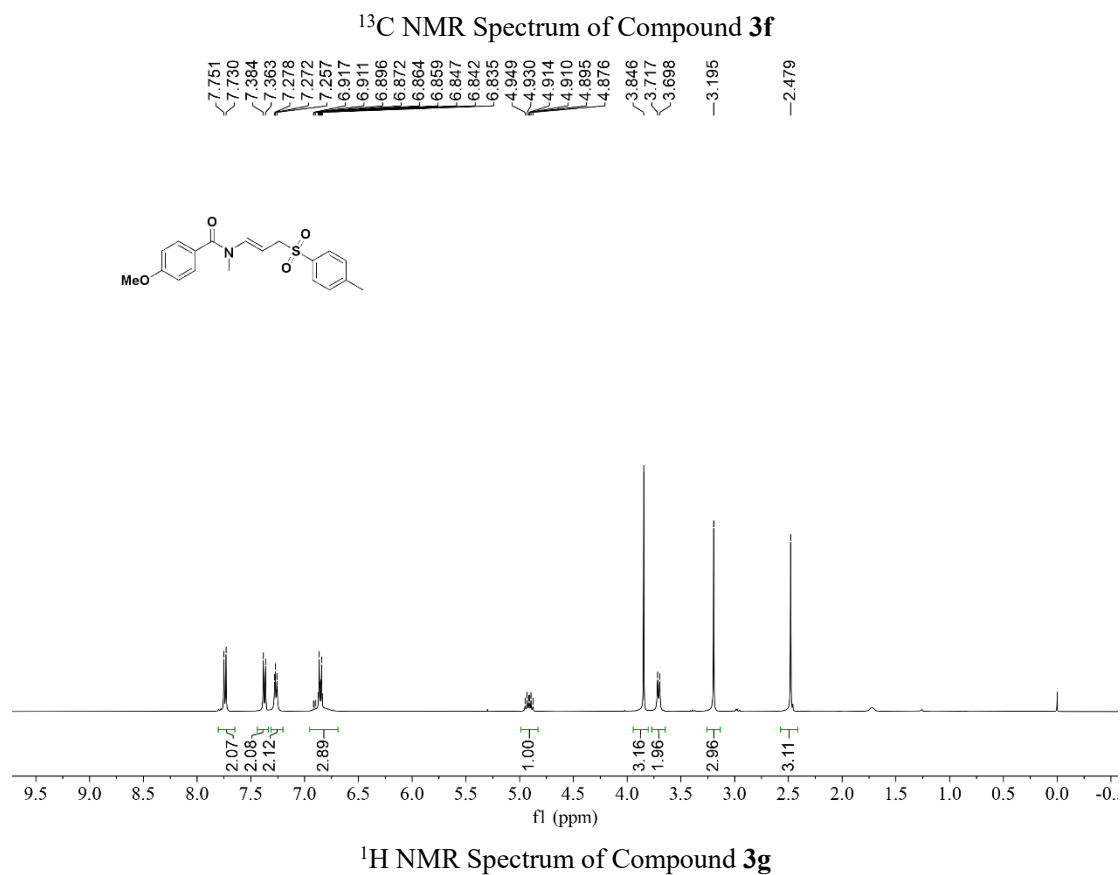

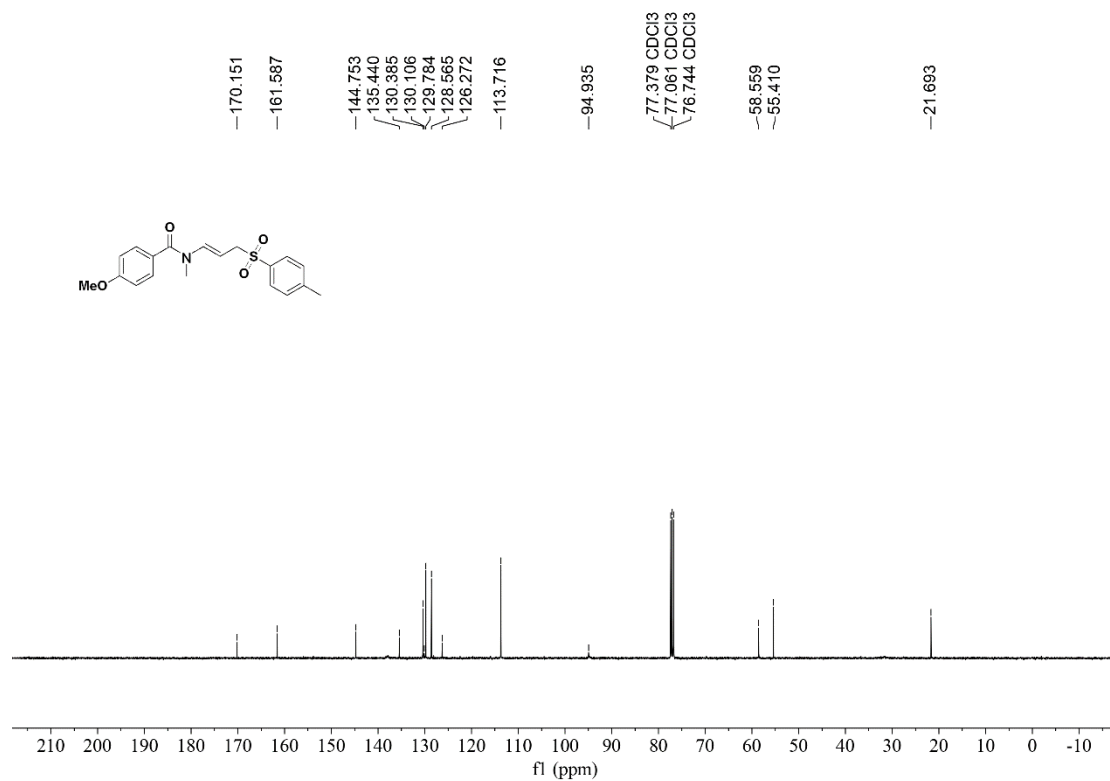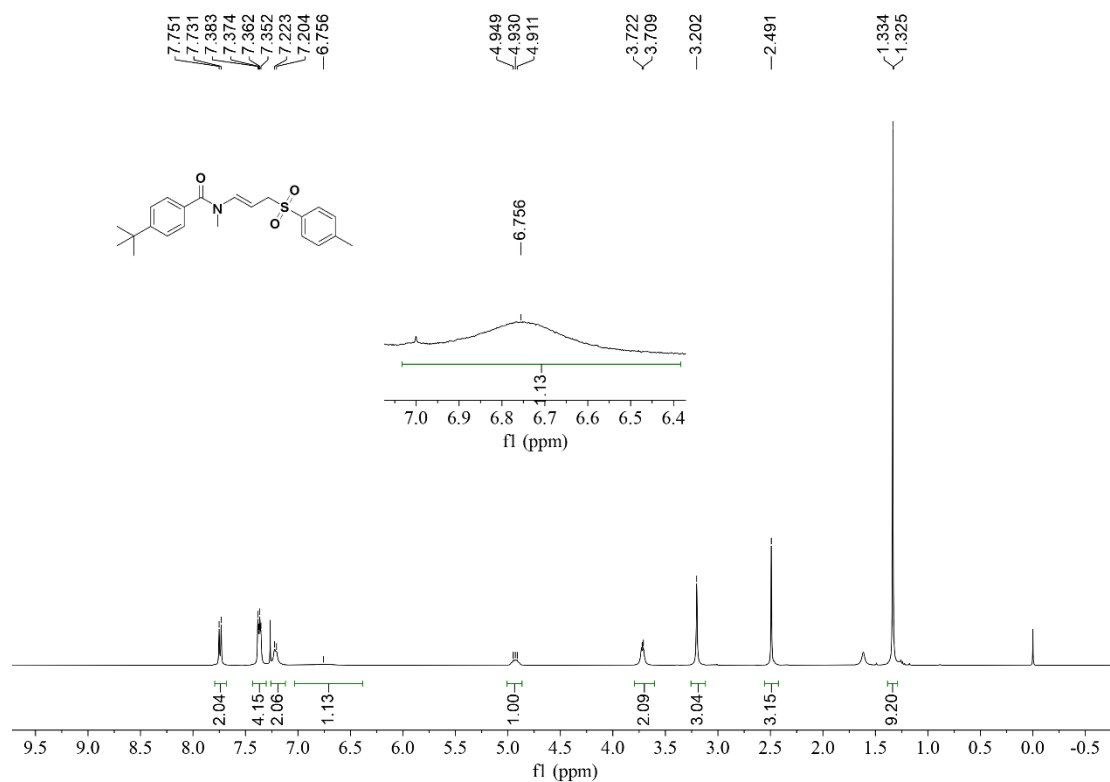

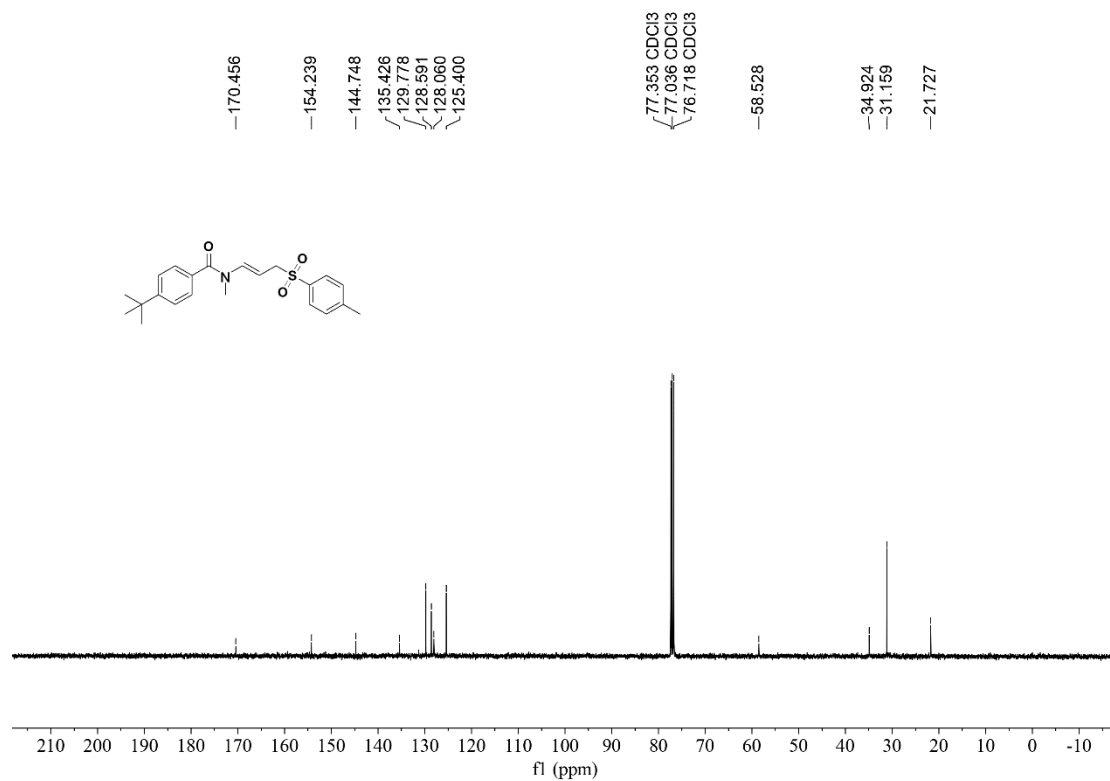

<sup>13</sup>C NMR Spectrum of Compound 3h

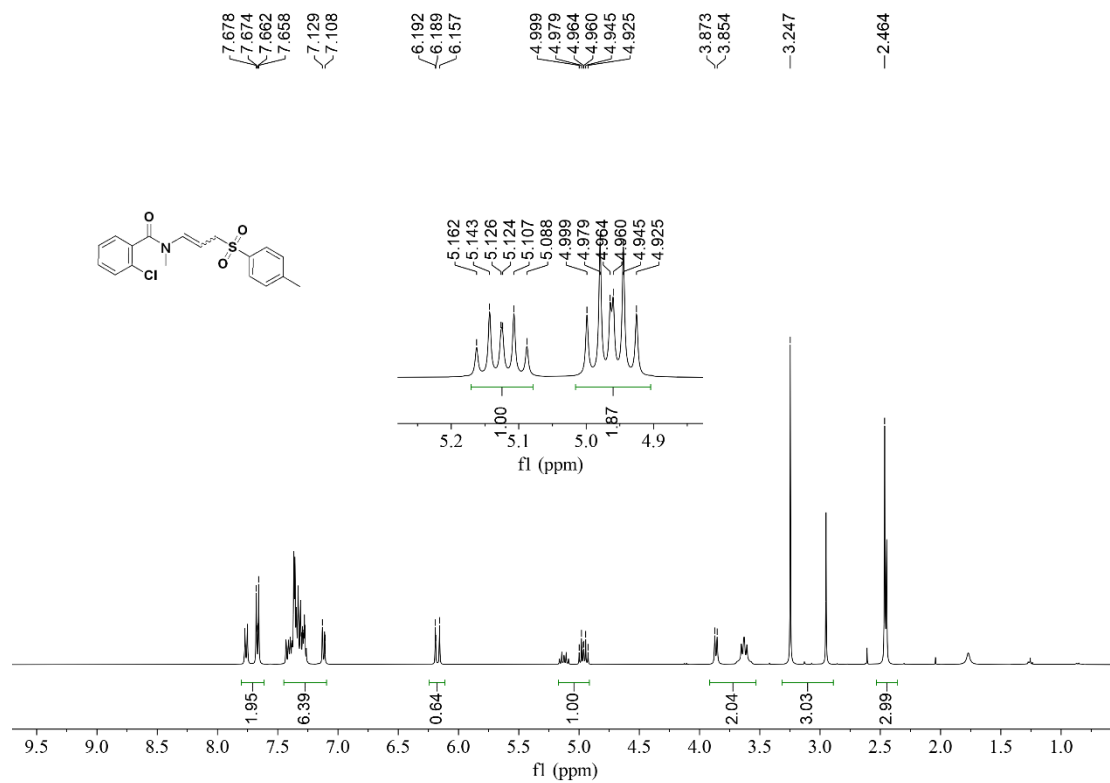

<sup>1</sup>H NMR Spectrum of Compound 3i

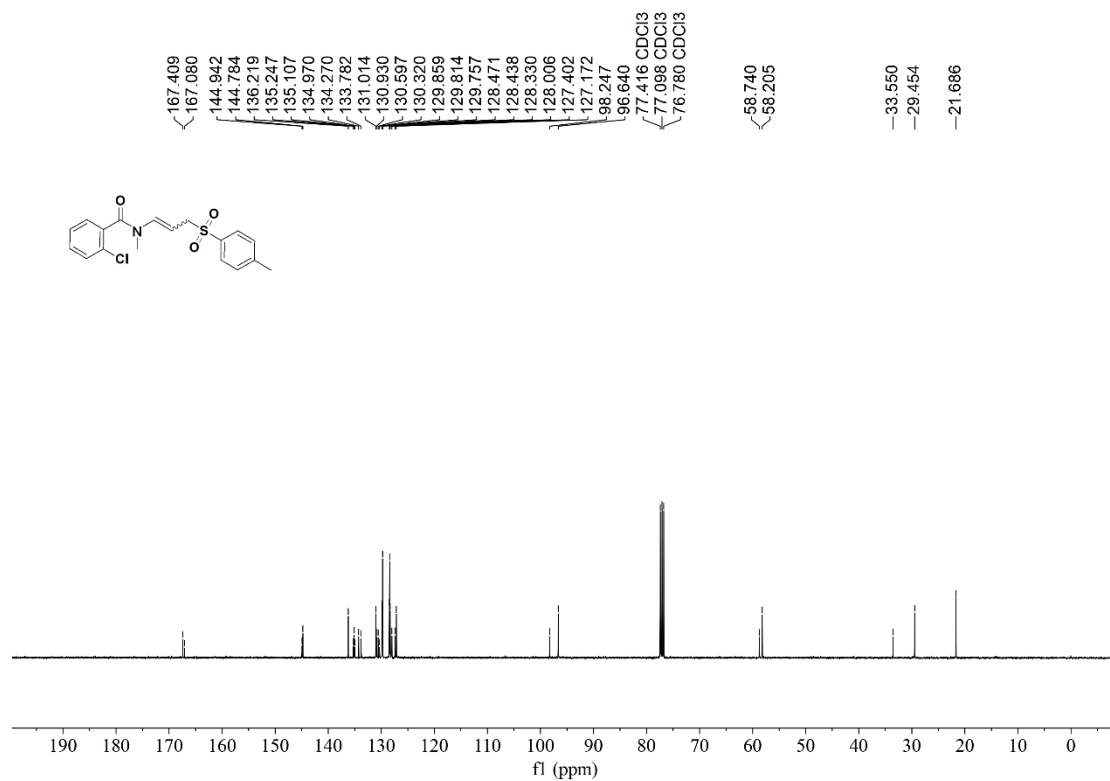

<sup>13</sup>C NMR Spectrum of Compound 3i

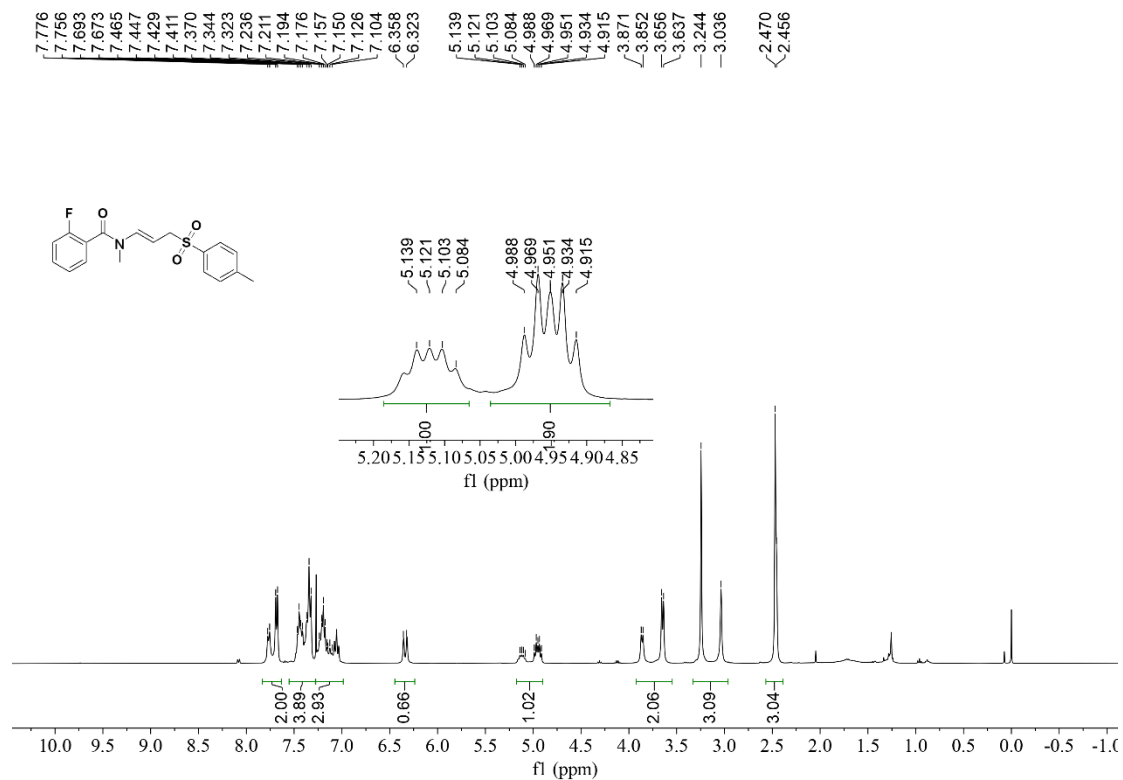

<sup>1</sup>H NMR Spectrum of Compound 3j

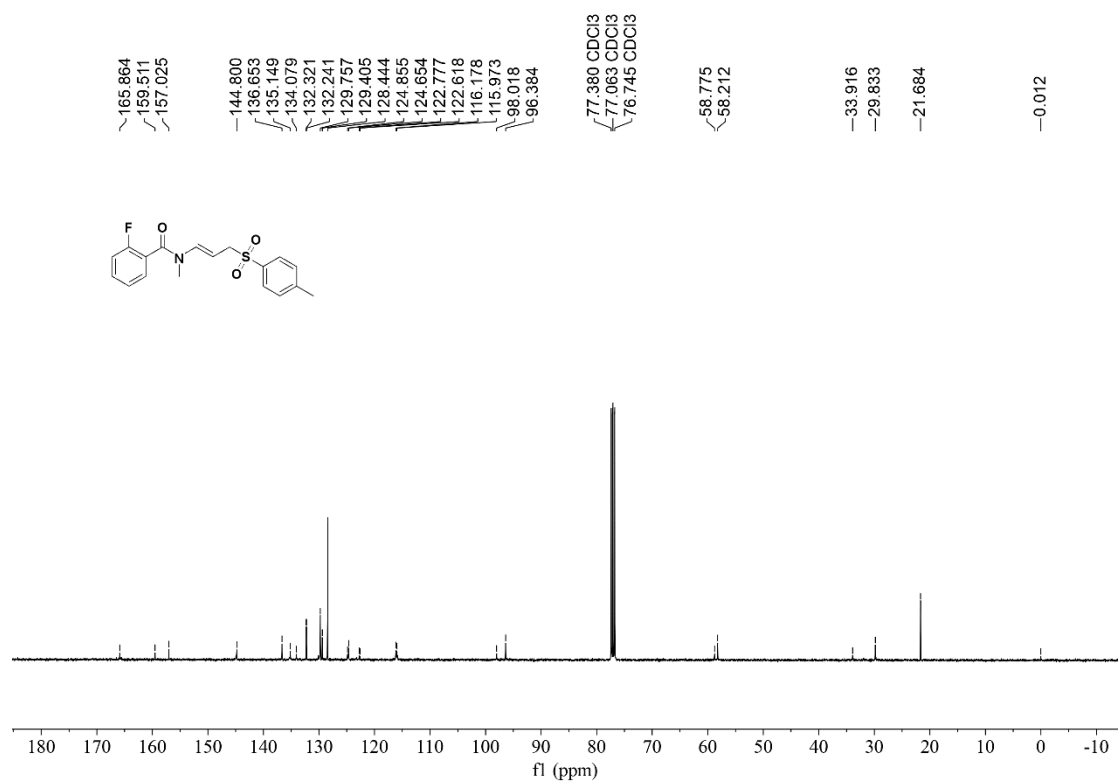

<sup>13</sup>C NMR Spectrum of Compound 3j

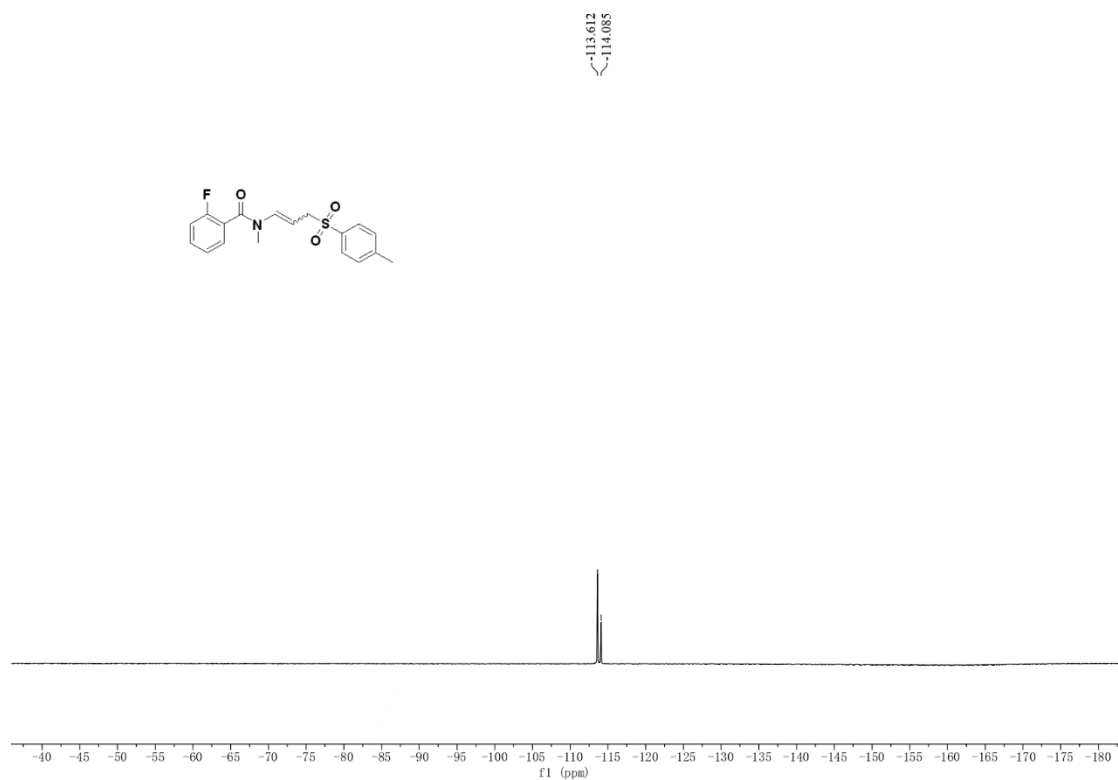

<sup>19</sup>F NMR Spectrum of Compound 3j



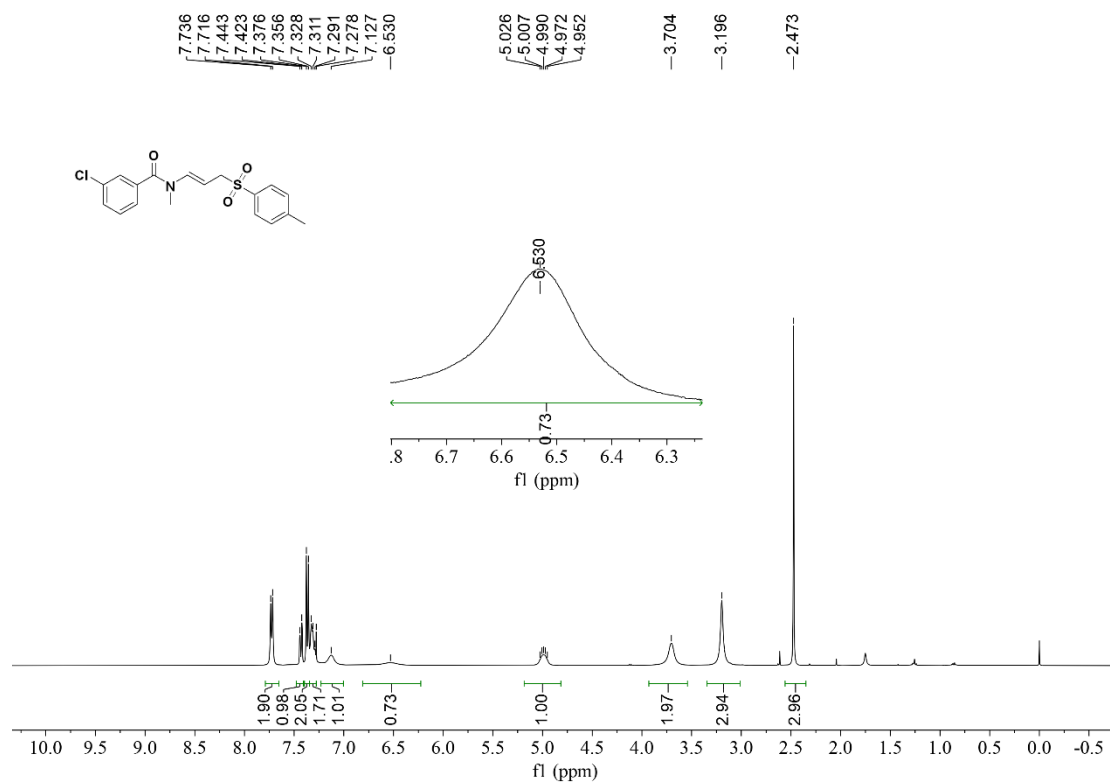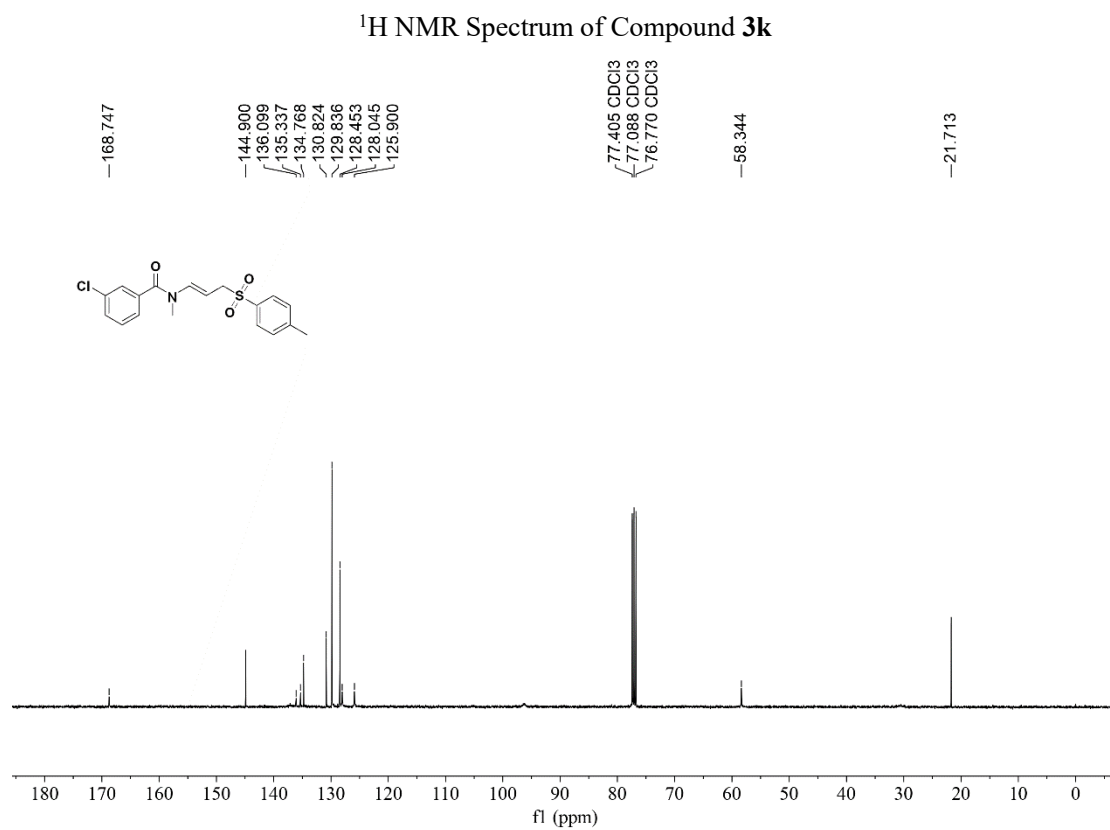

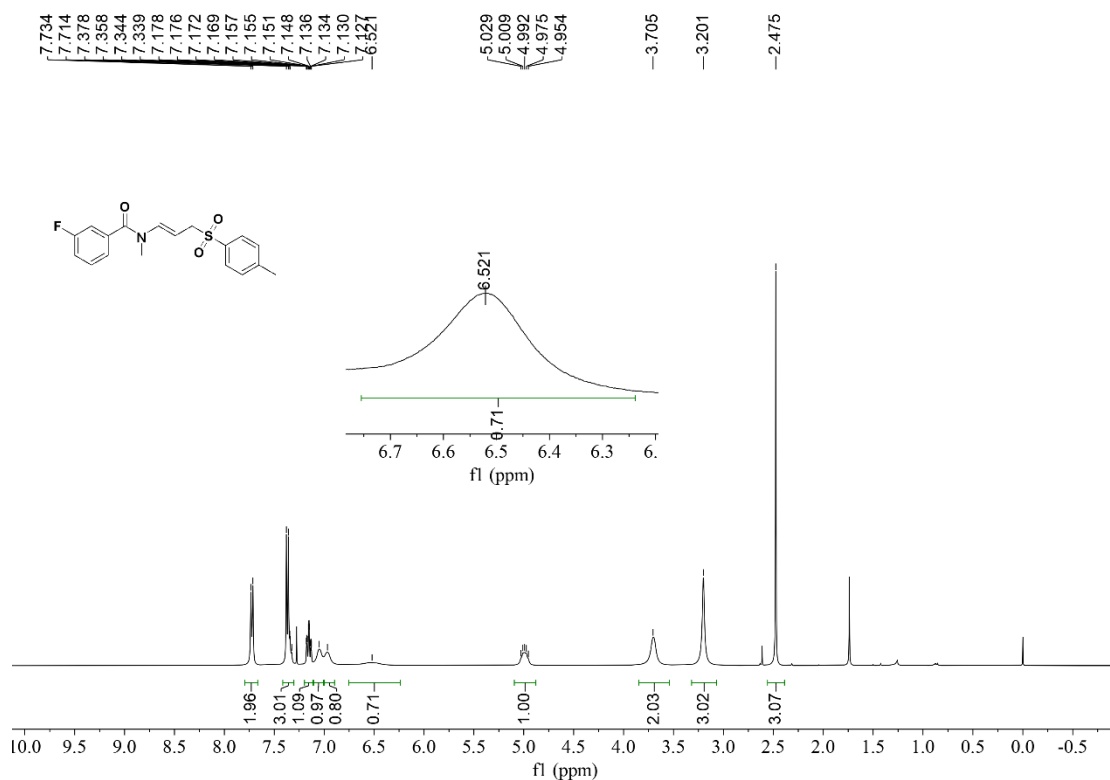

<sup>1</sup>H NMR Spectrum of Compound 31

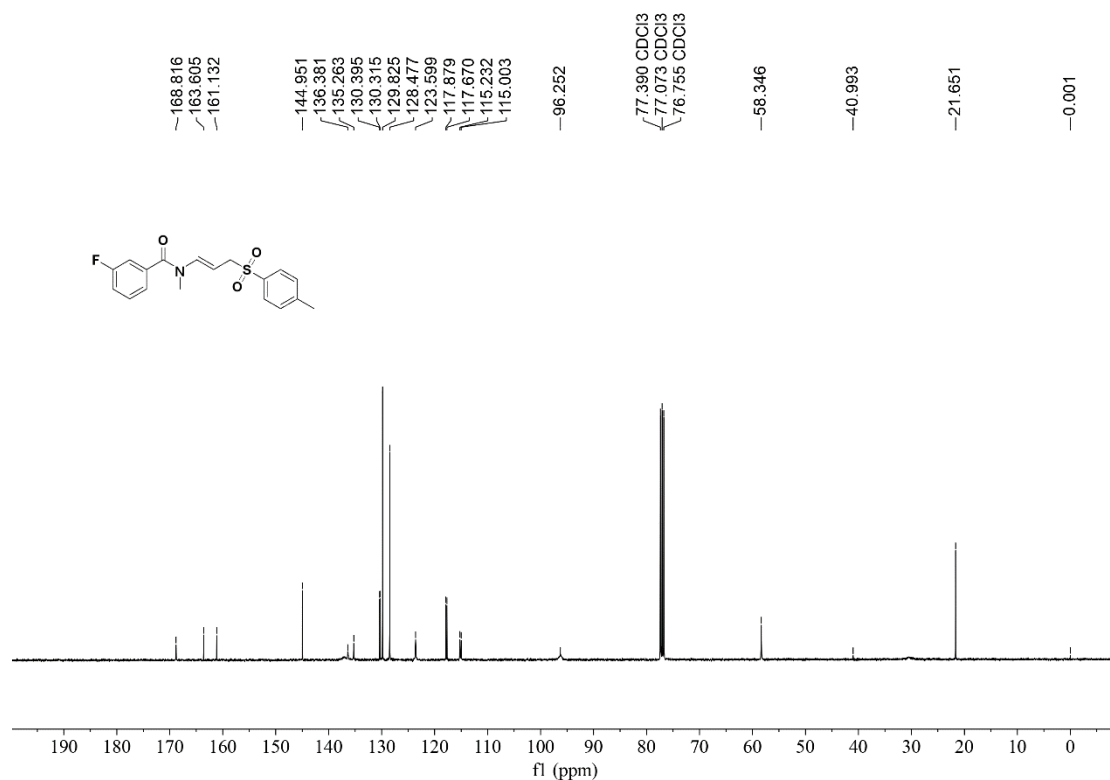

<sup>13</sup>C NMR Spectrum of Compound 31

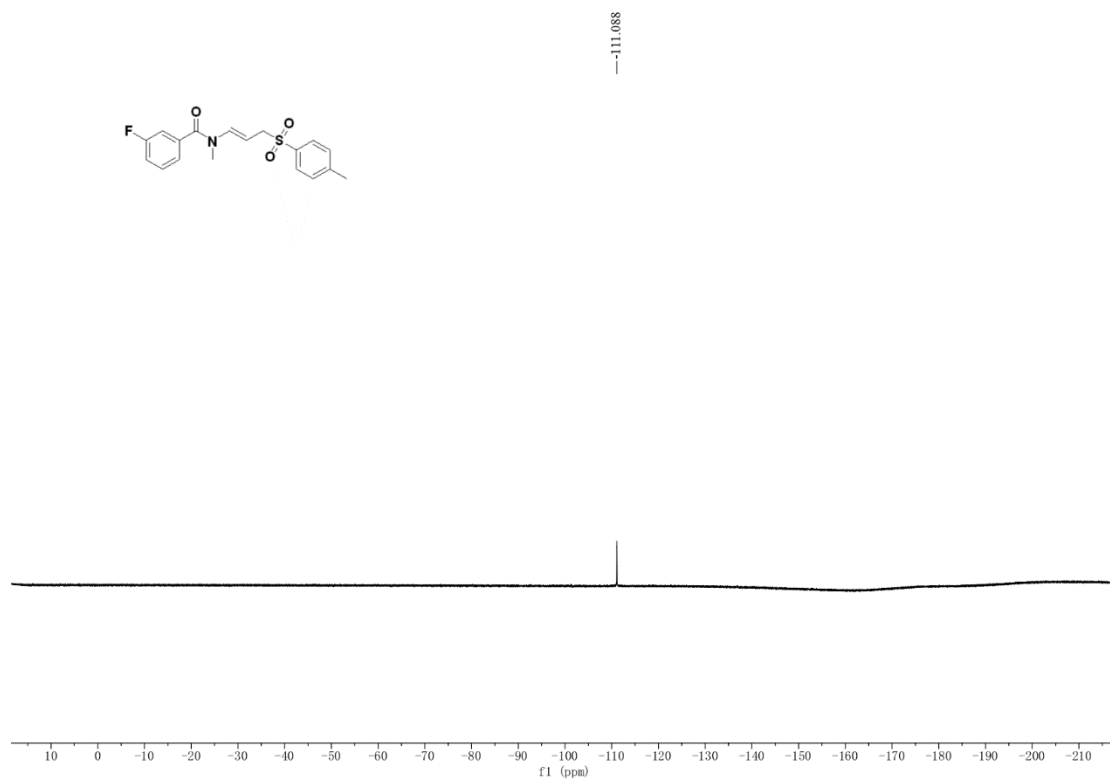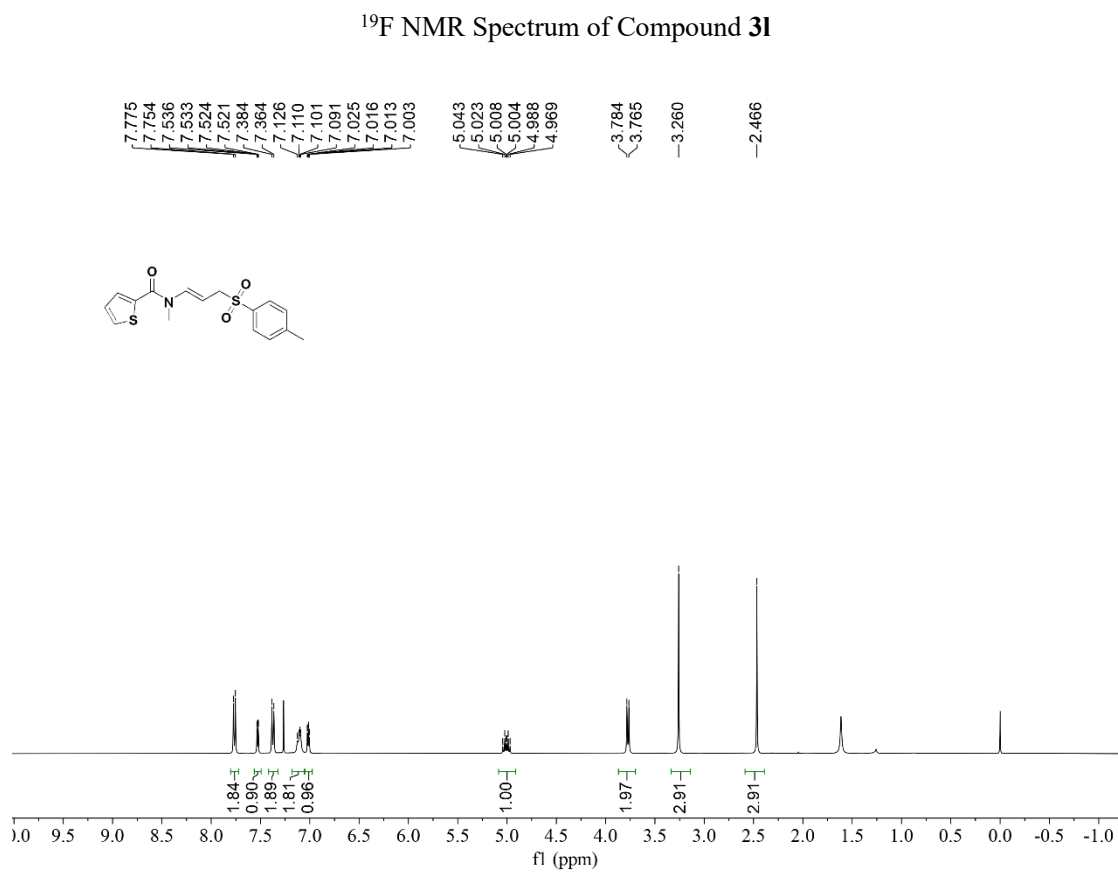

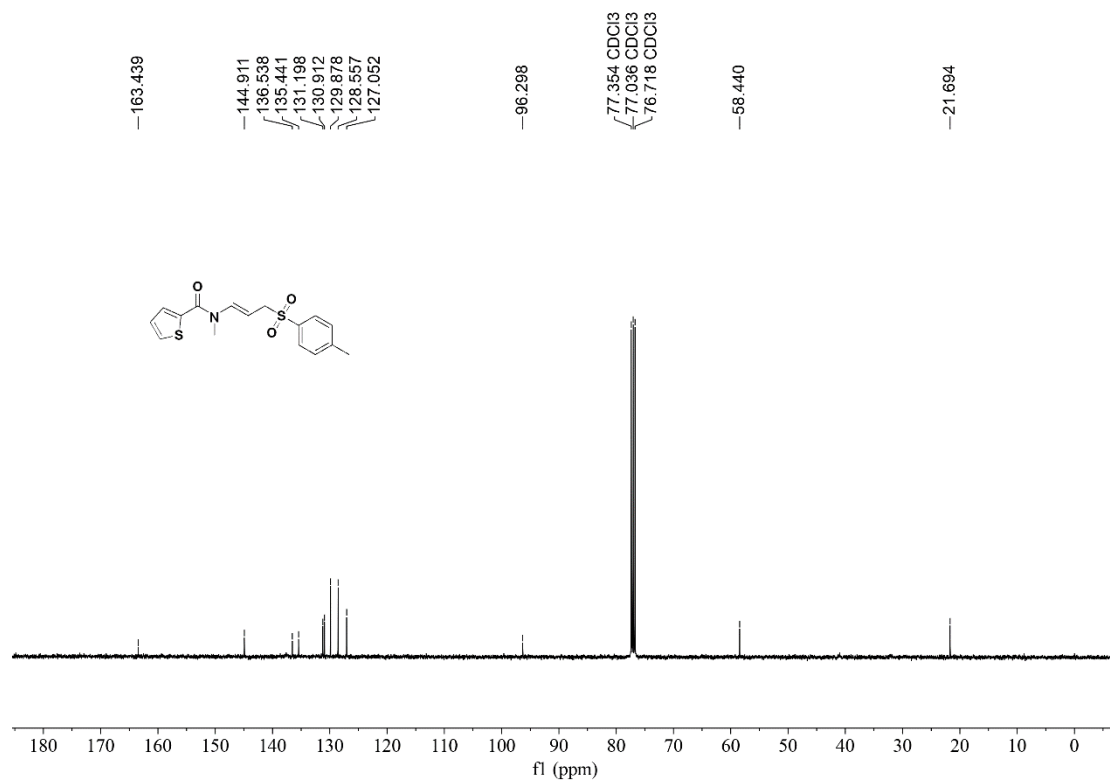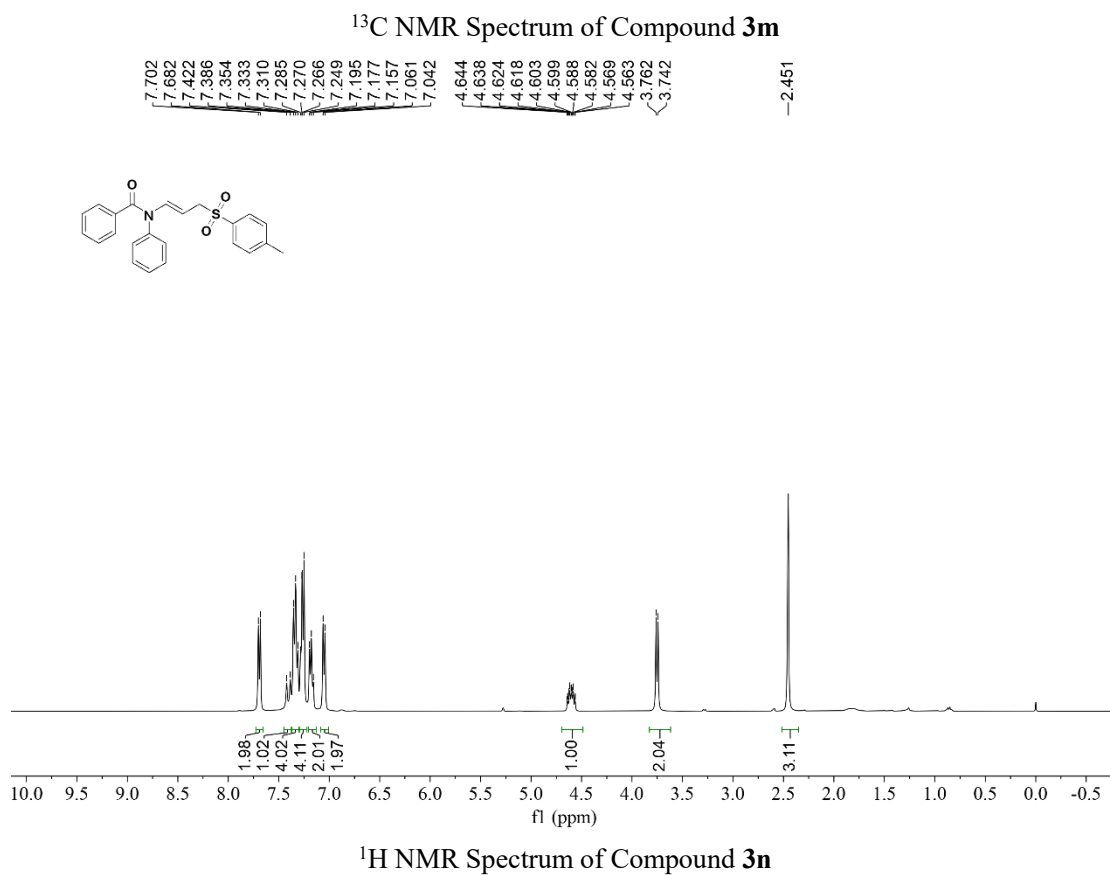

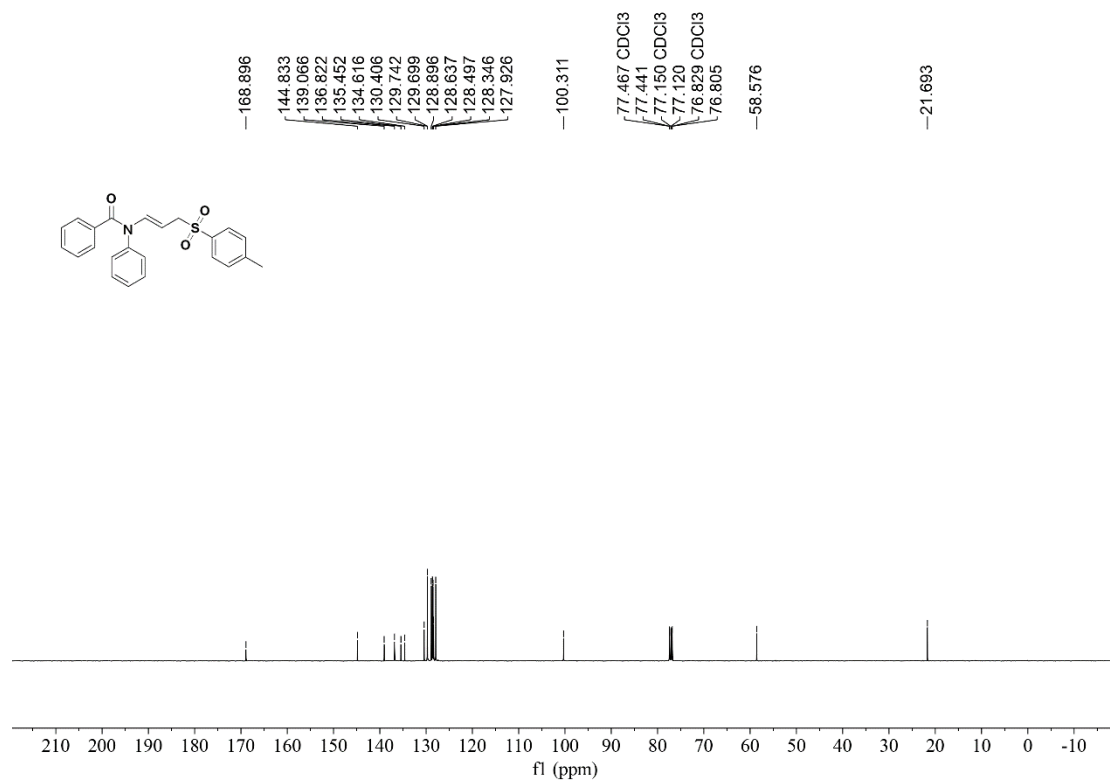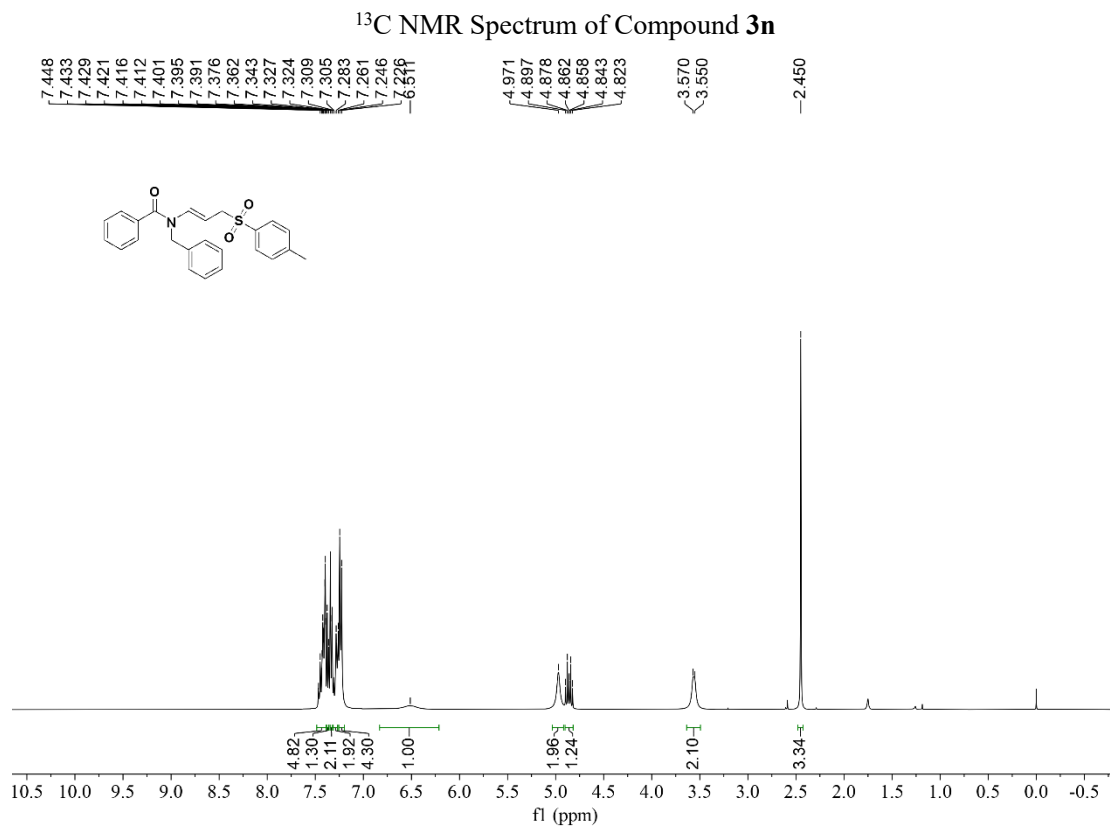

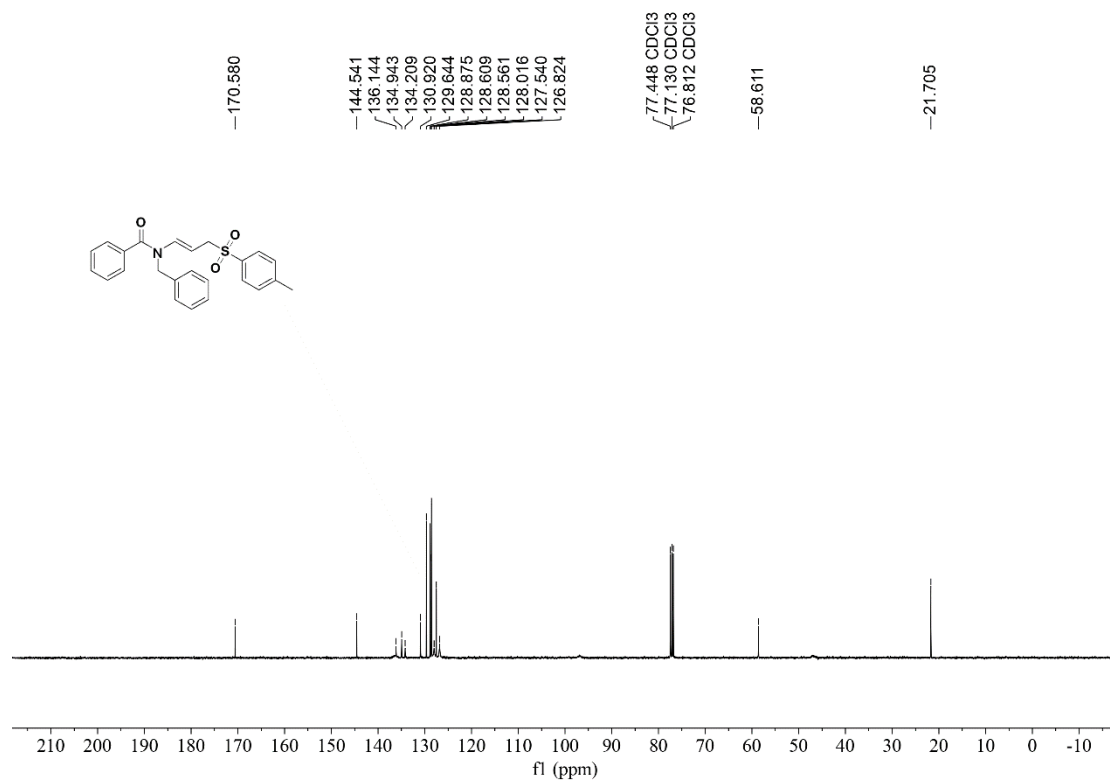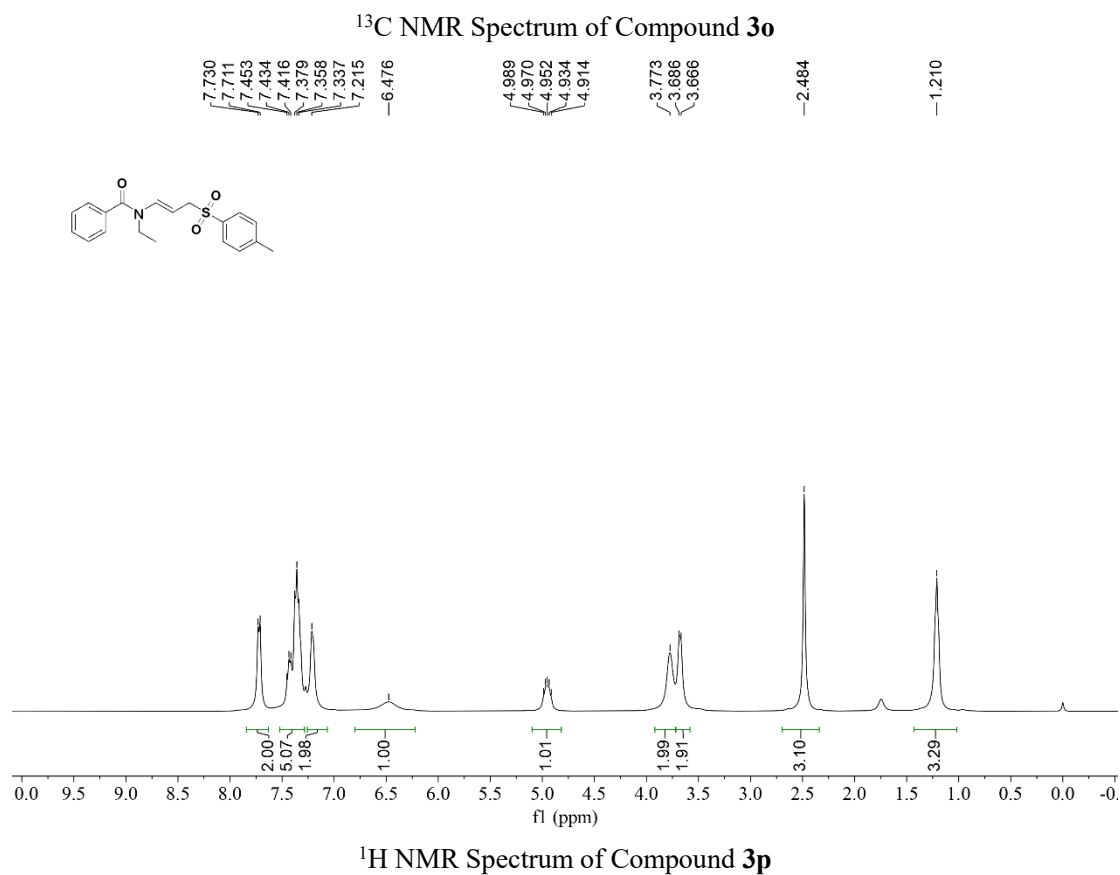

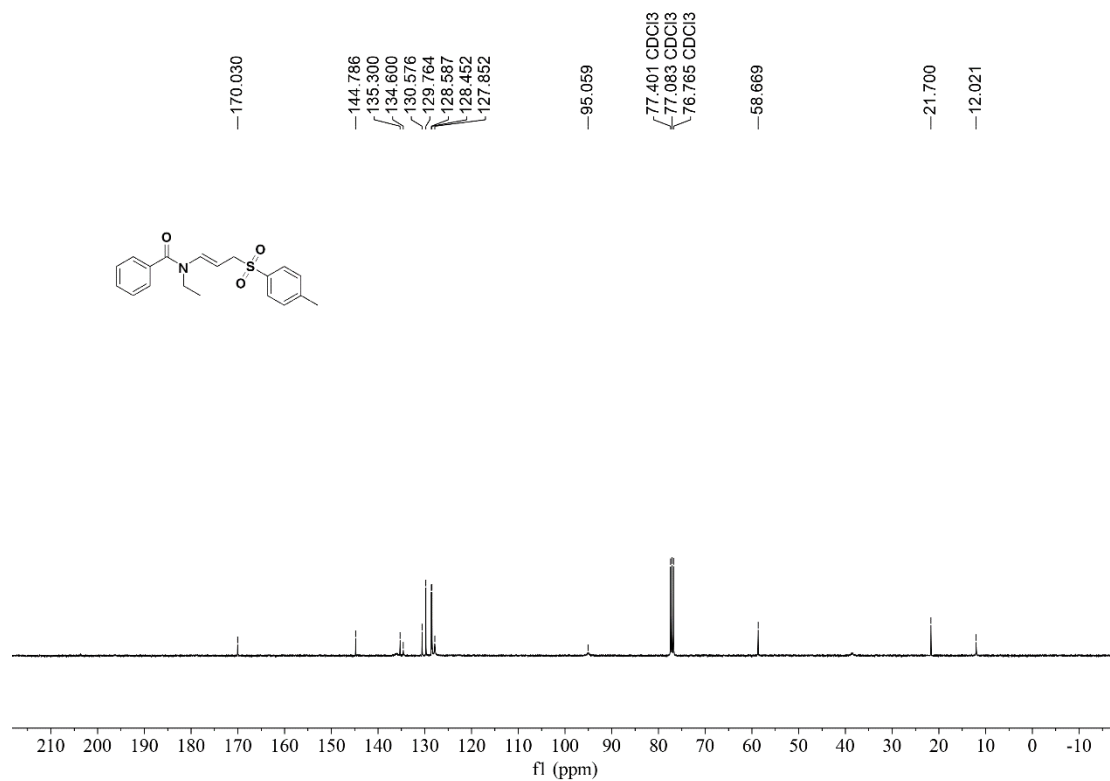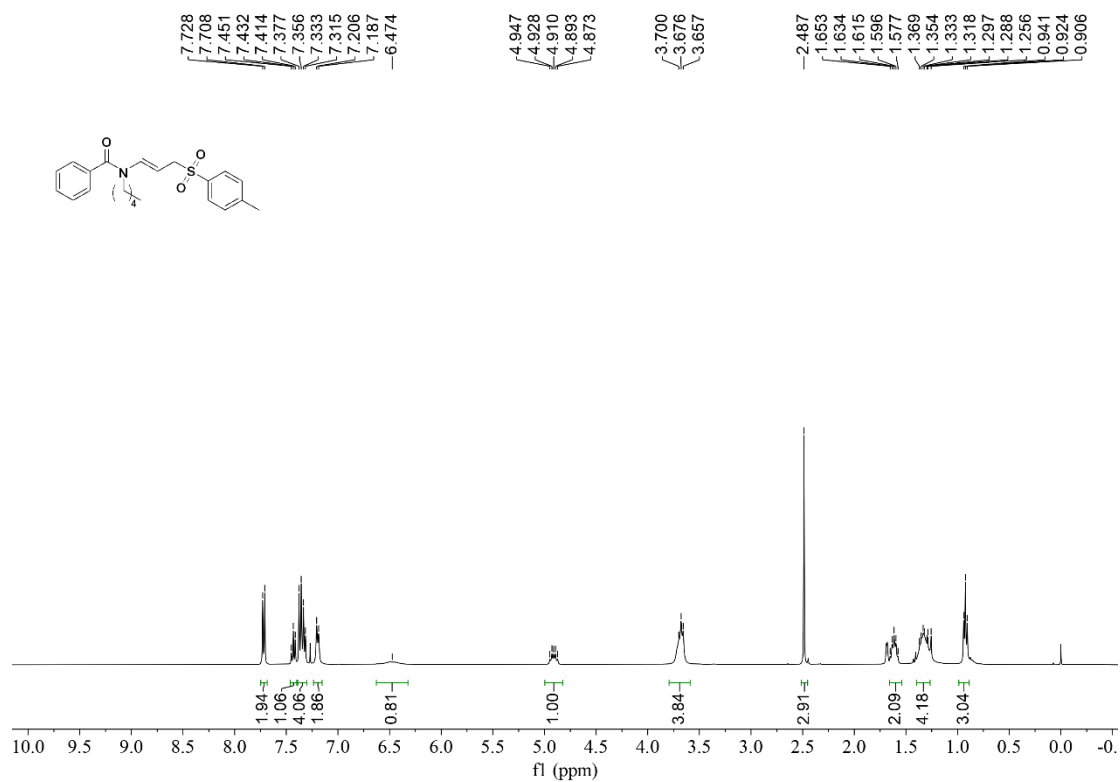

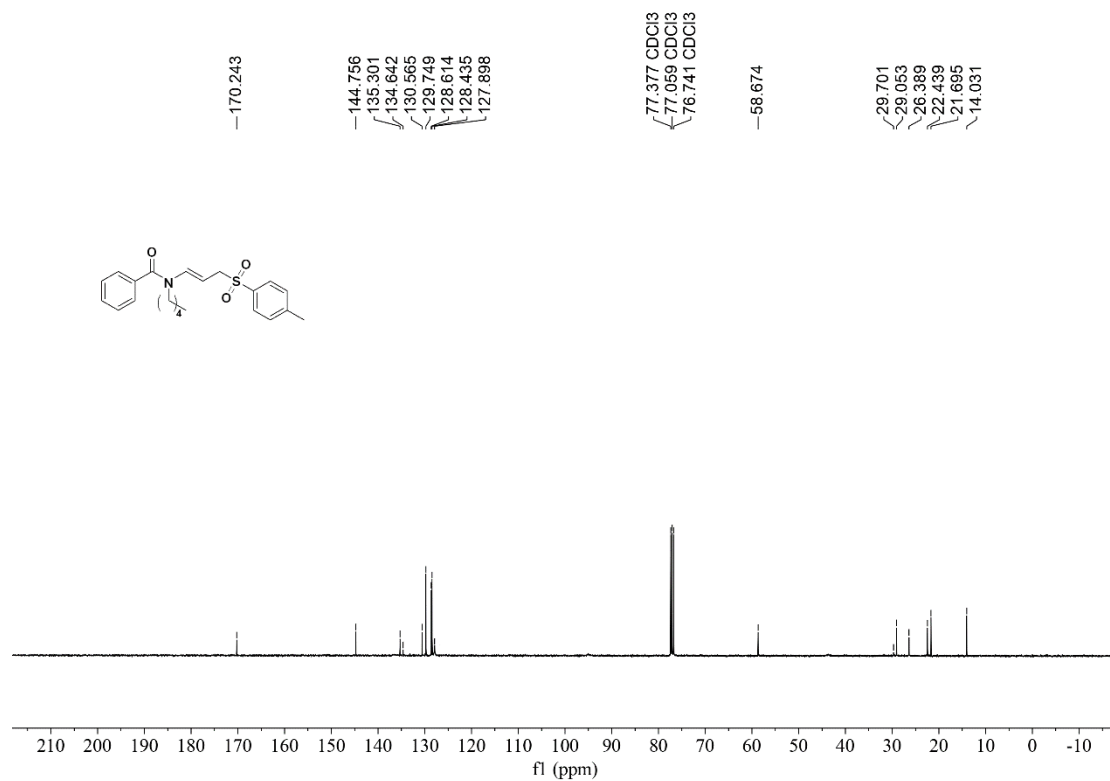

<sup>13</sup>C NMR Spectrum of Compound 3q

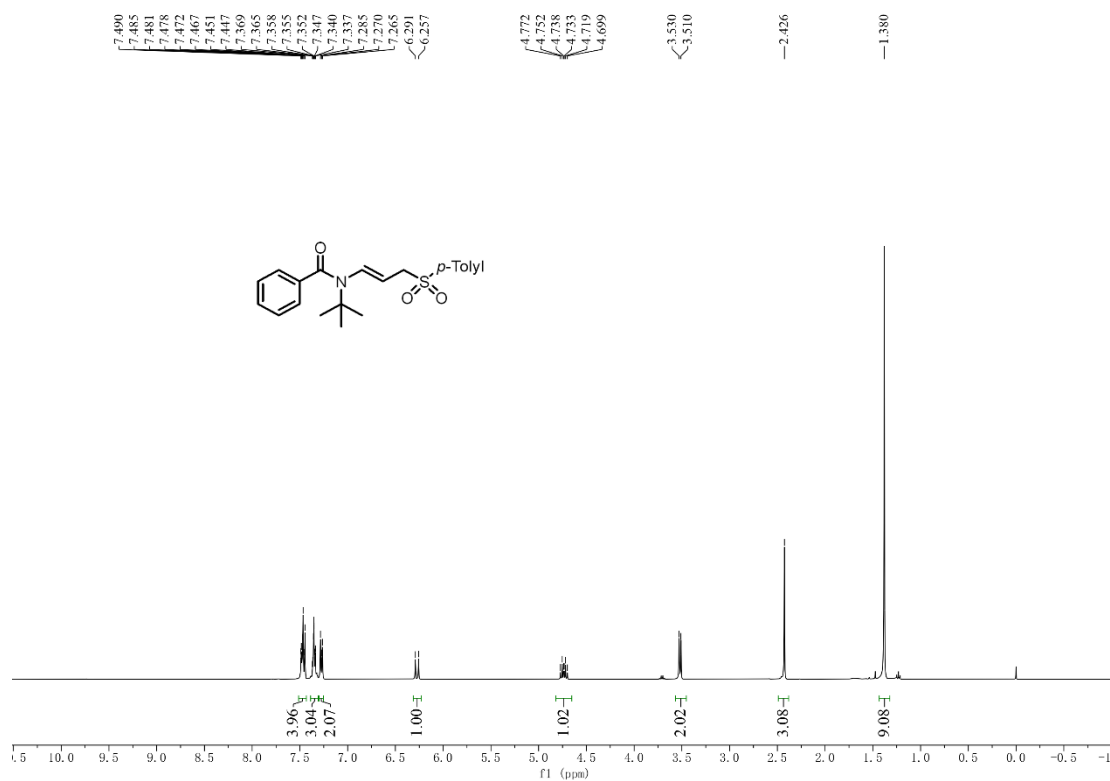

<sup>1</sup>H NMR Spectrum of Compound 3r



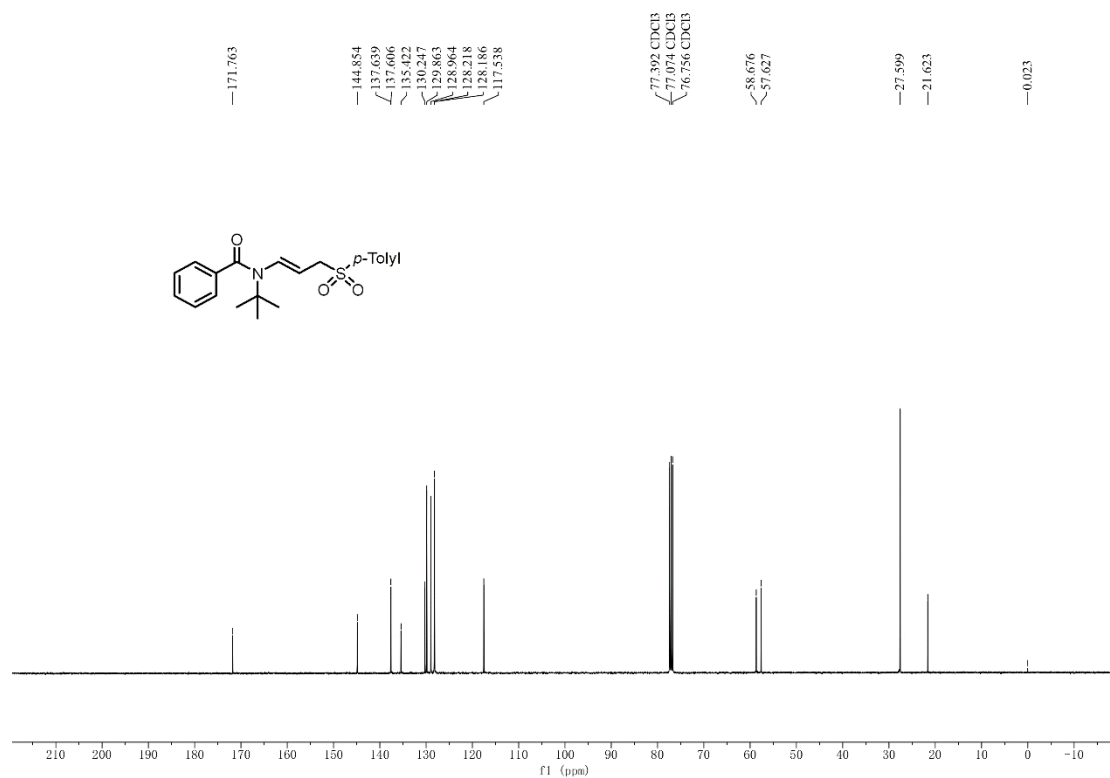

<sup>13</sup>C NMR Spectrum of Compound 3r

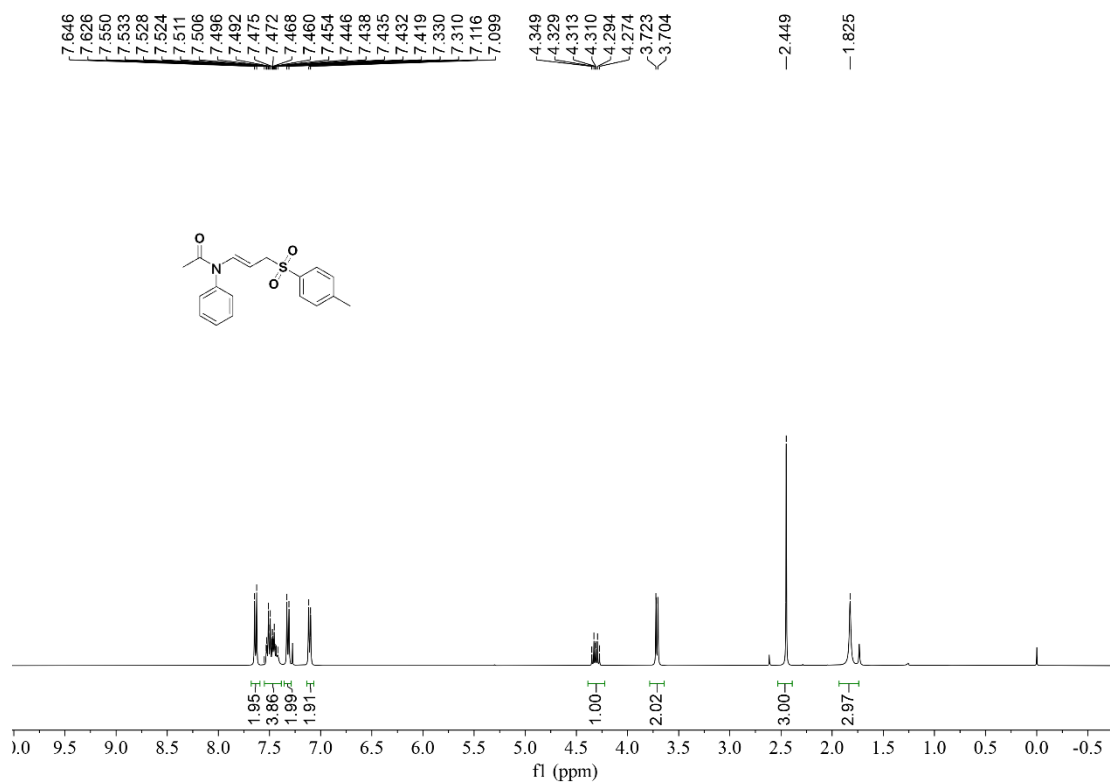

<sup>1</sup>H NMR Spectrum of Compound 3s

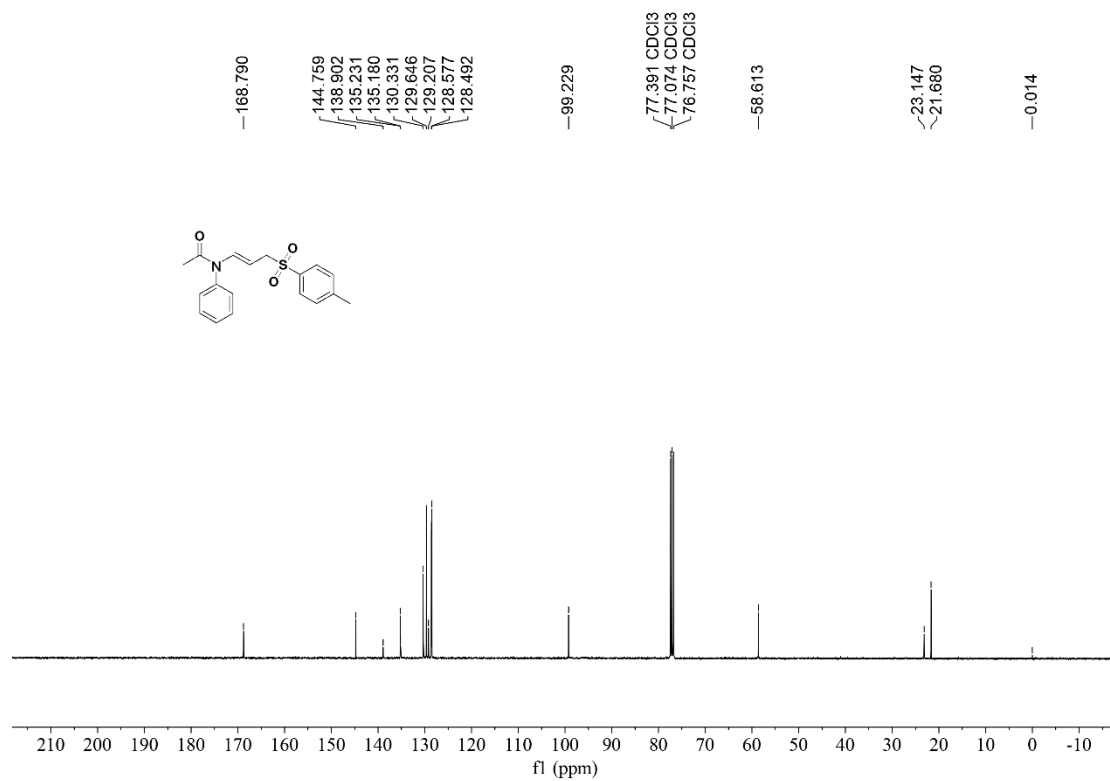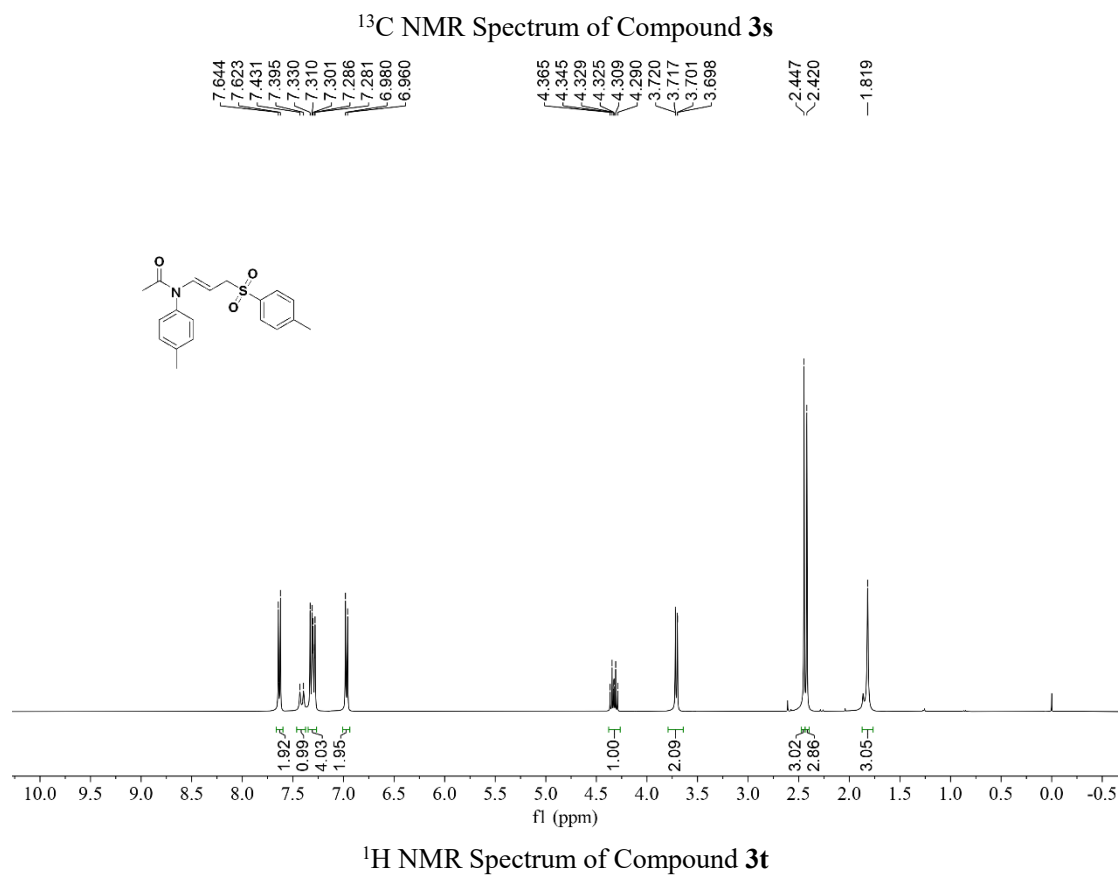

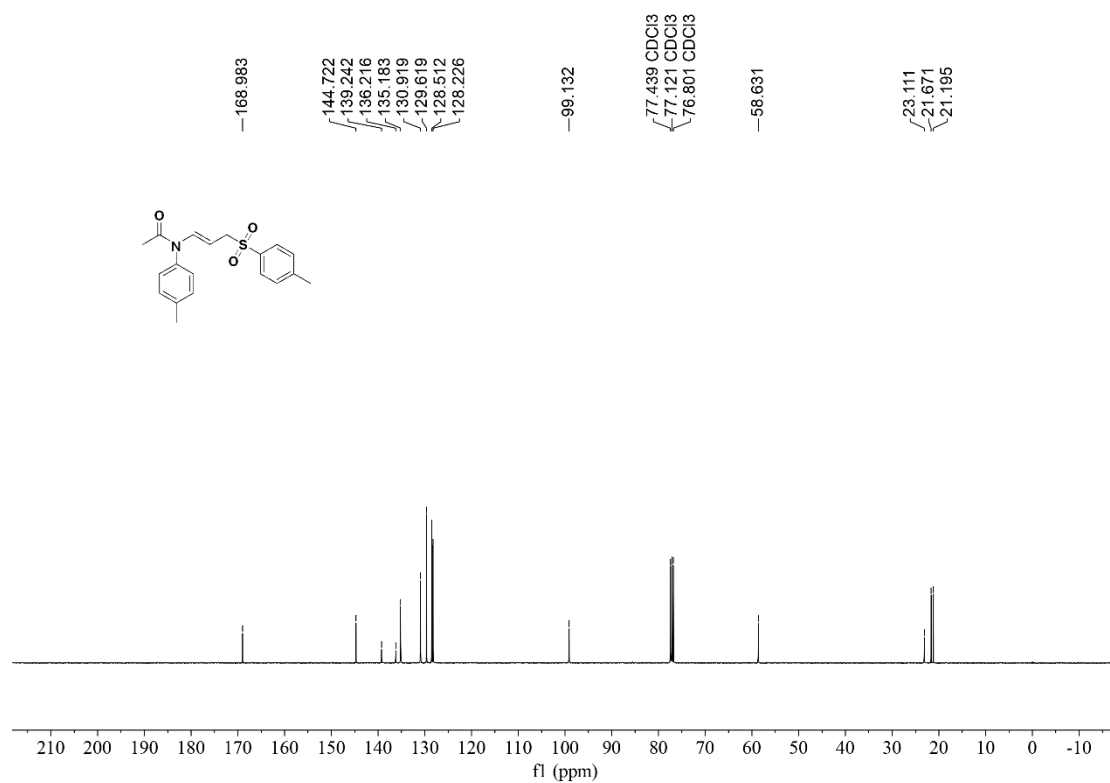

<sup>13</sup>C NMR Spectrum of Compound 3t

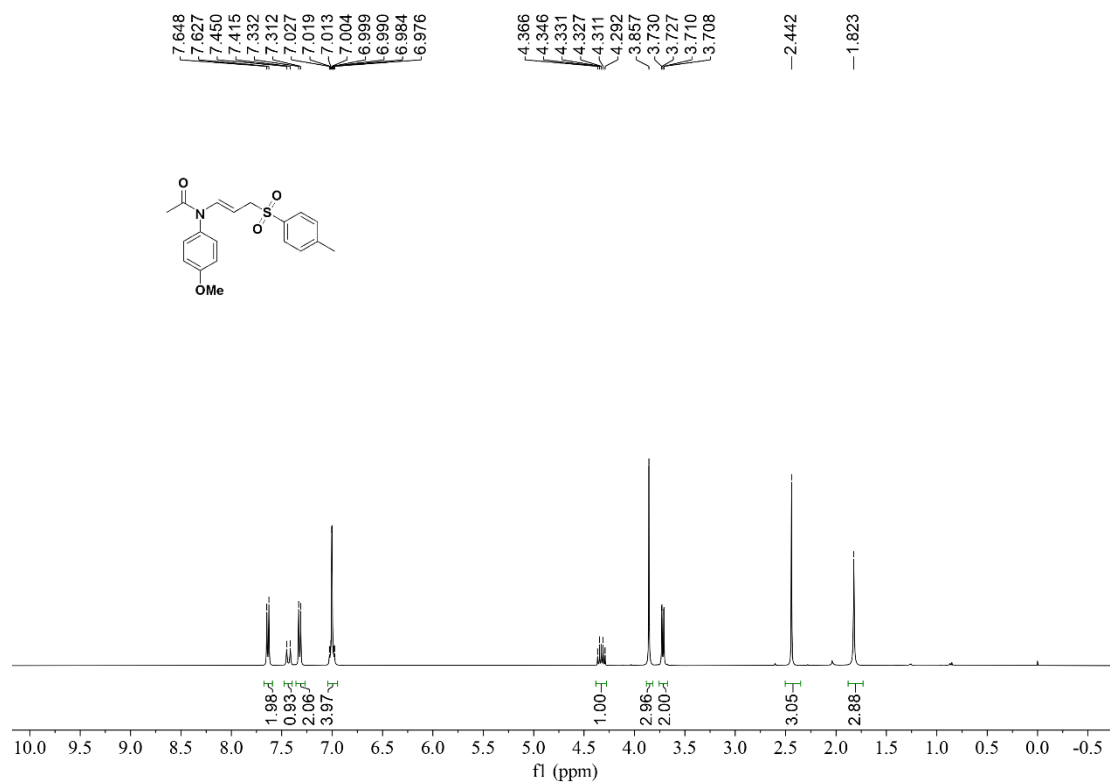

<sup>1</sup>H NMR Spectrum of Compound 3u

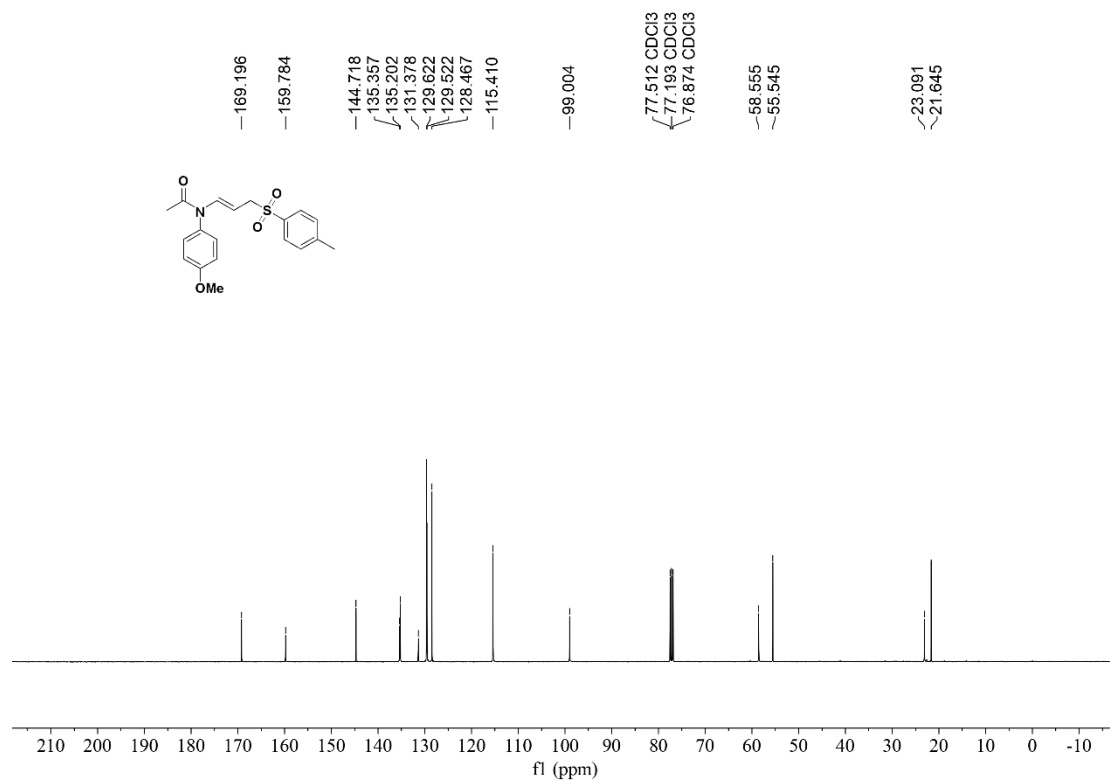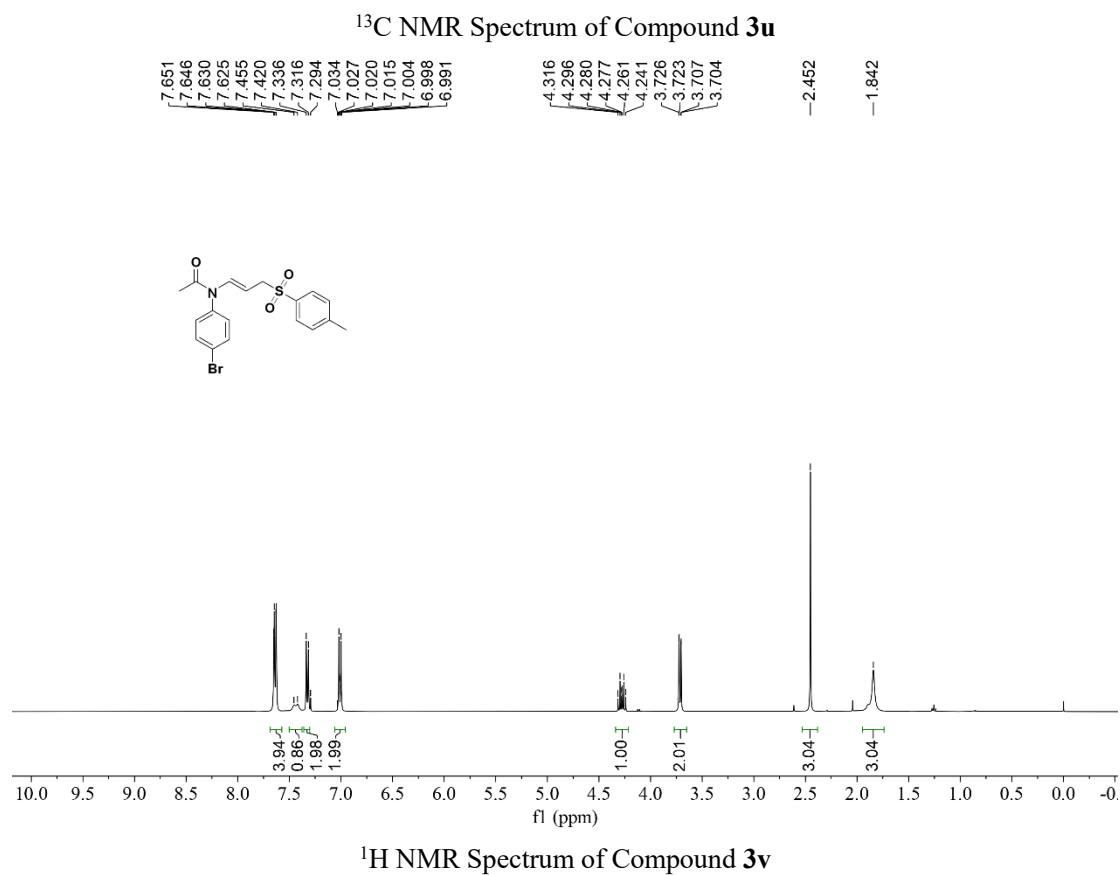

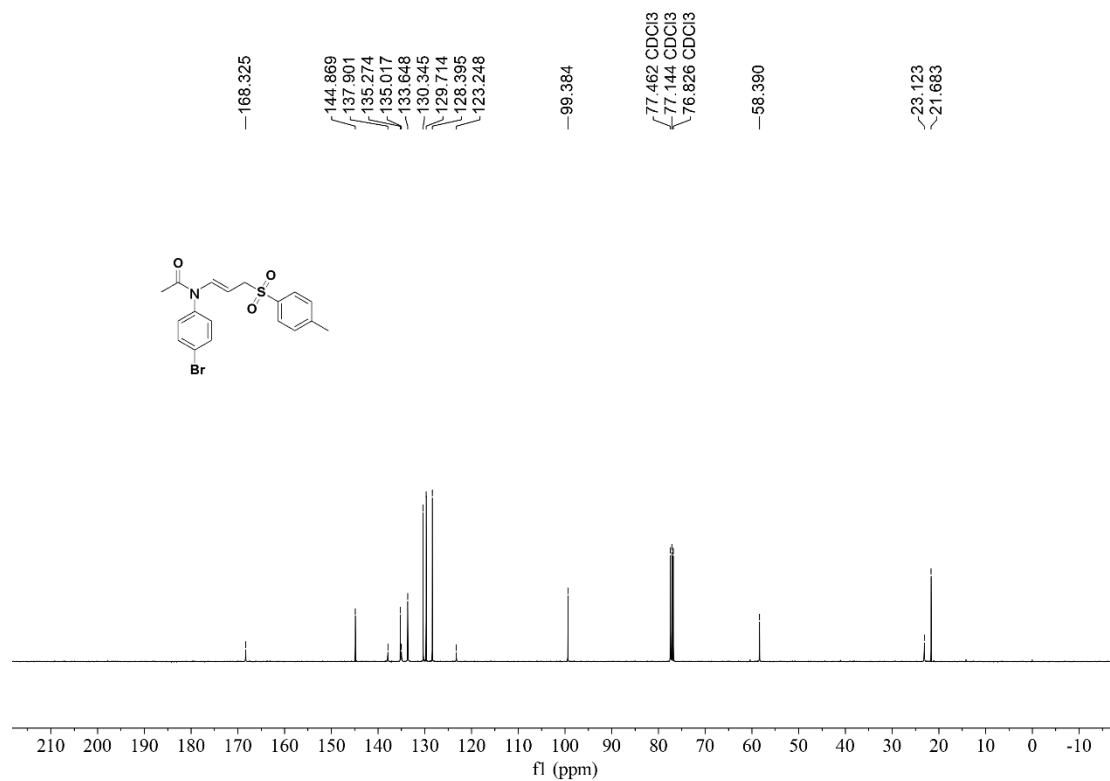

<sup>13</sup>C NMR Spectrum of Compound 3v

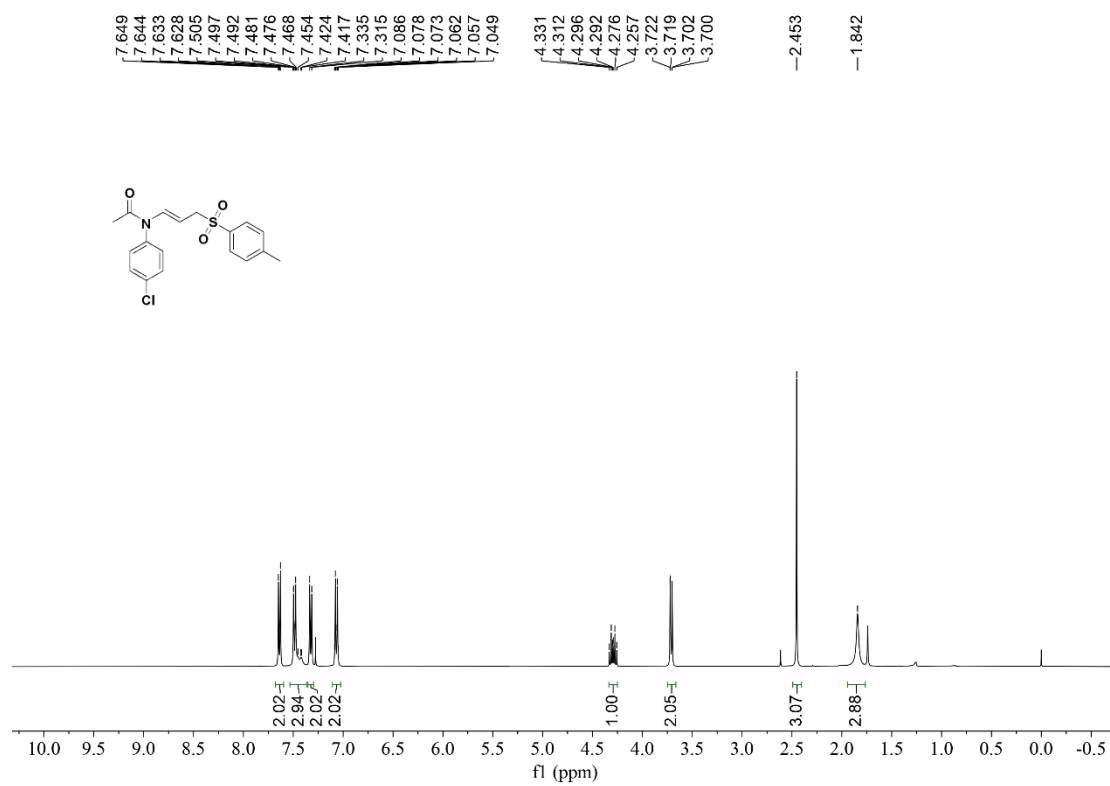

<sup>1</sup>H NMR Spectrum of Compound 3w

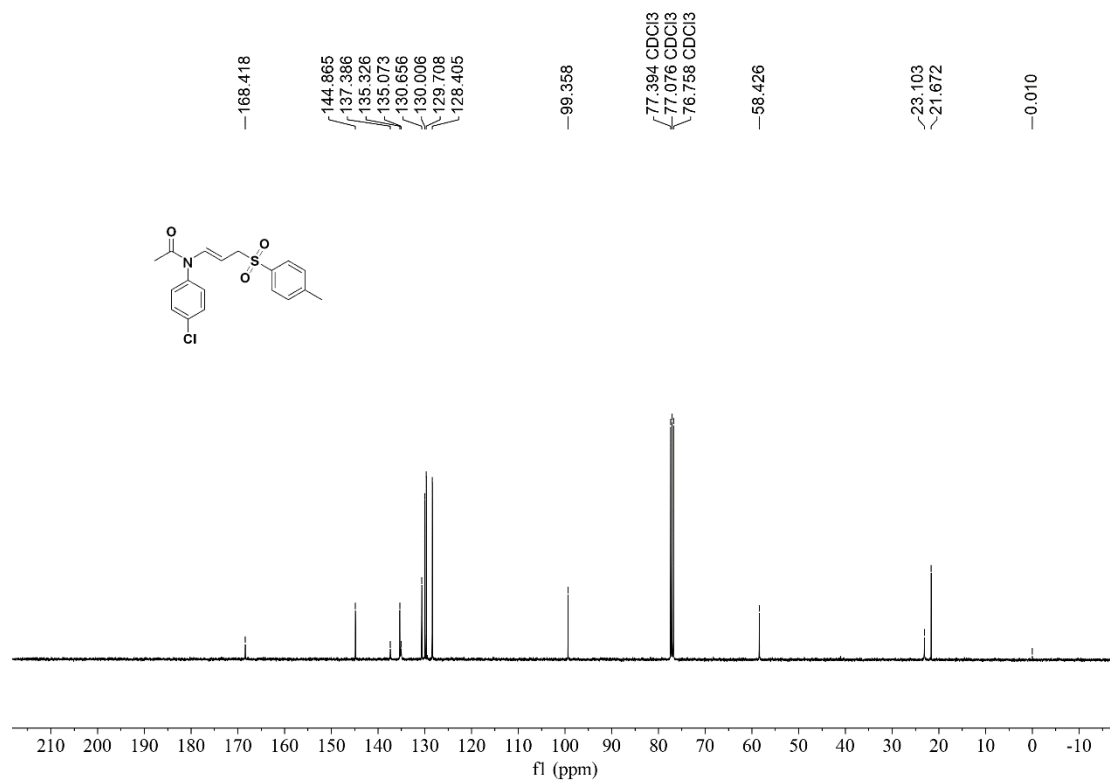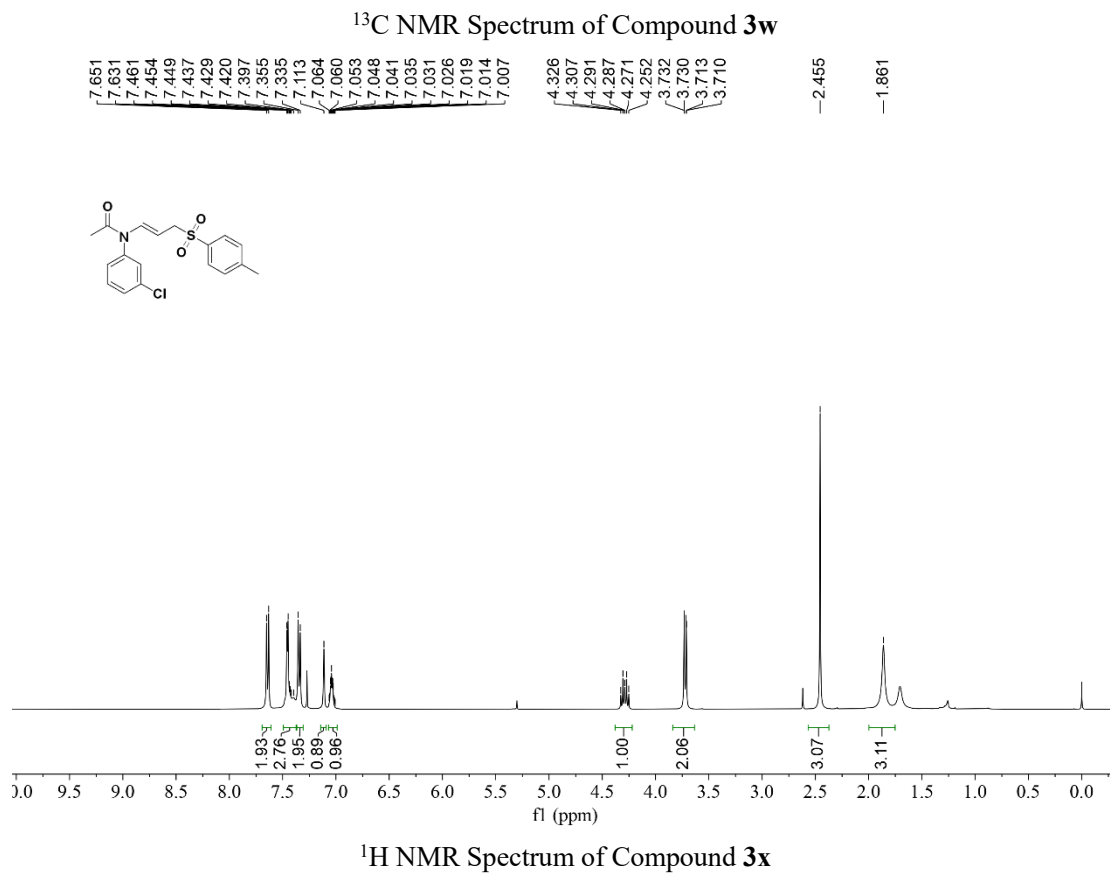

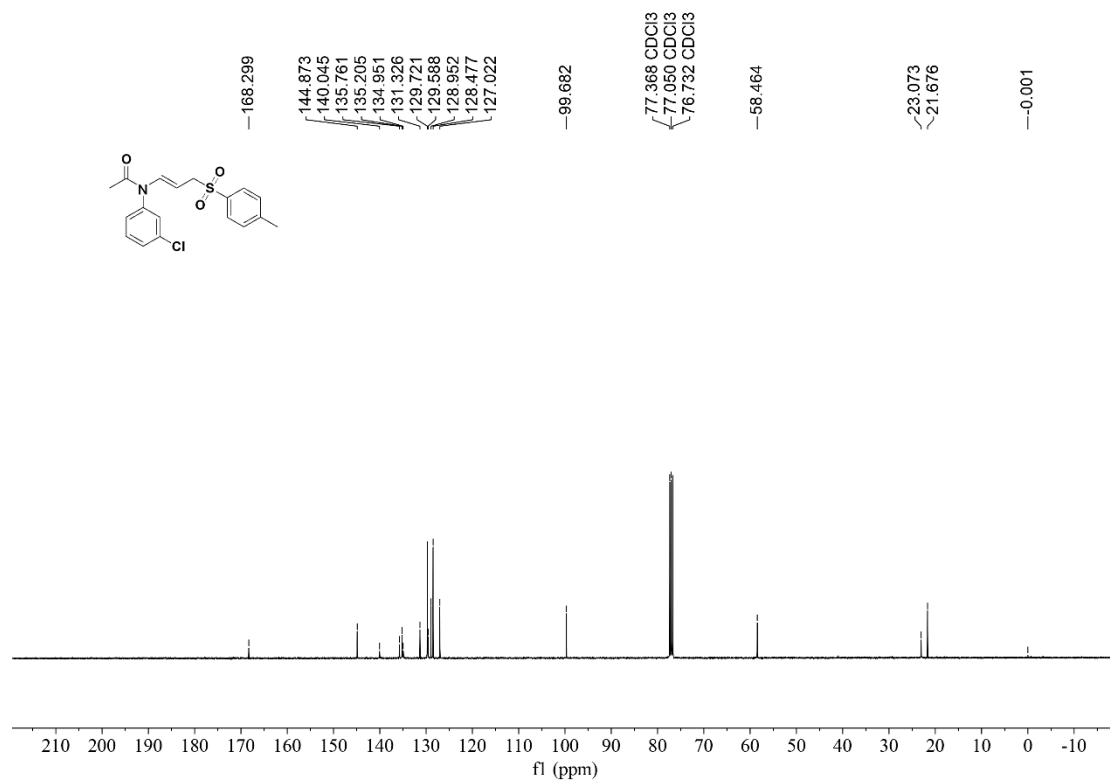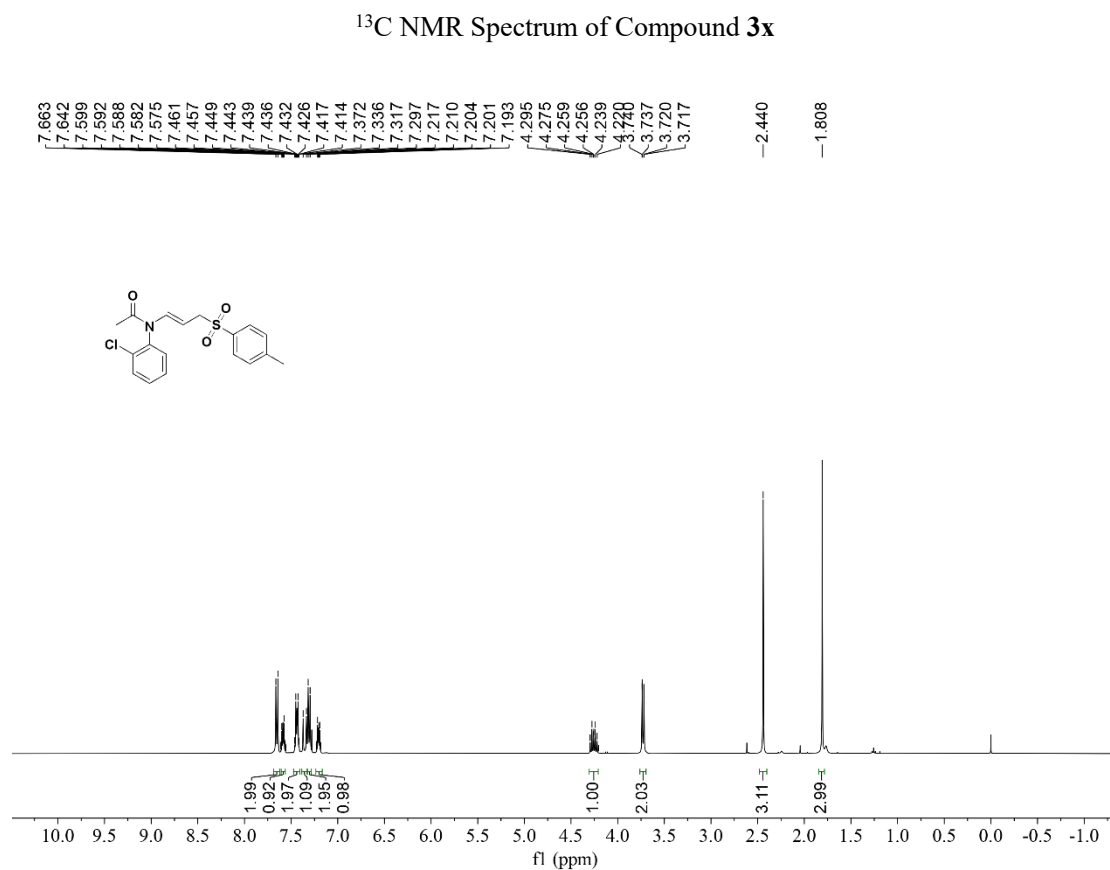

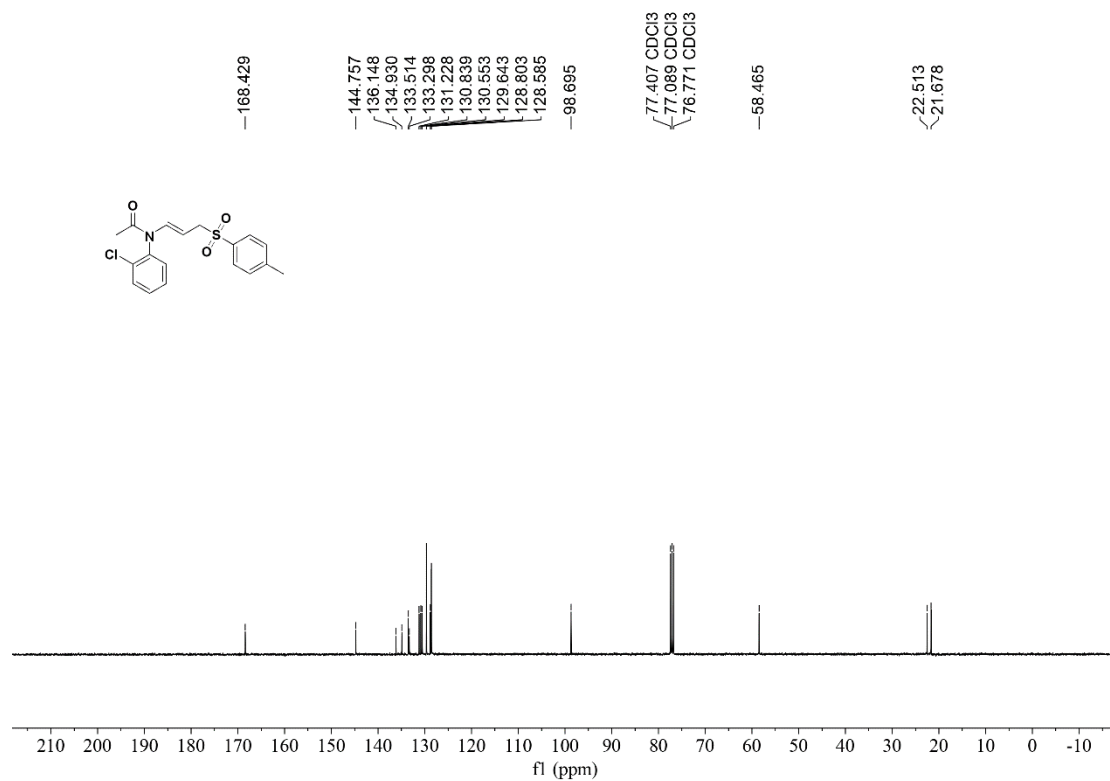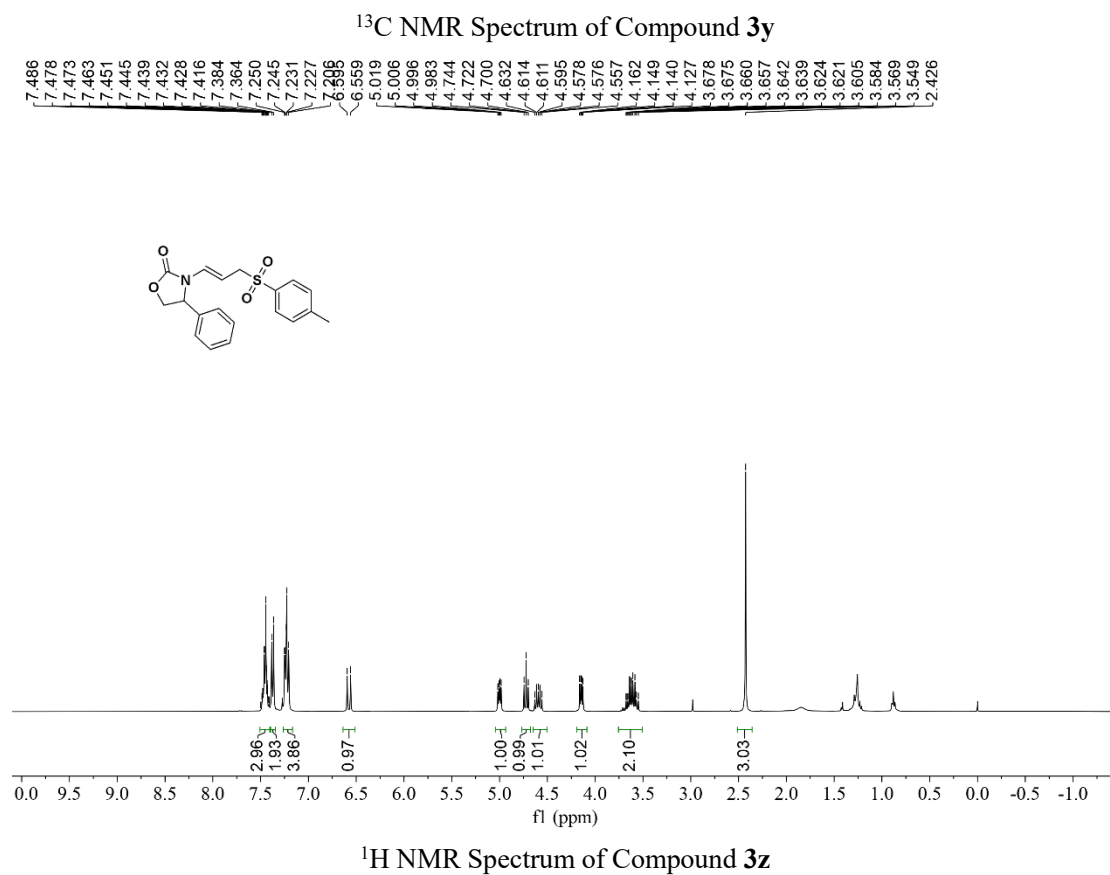



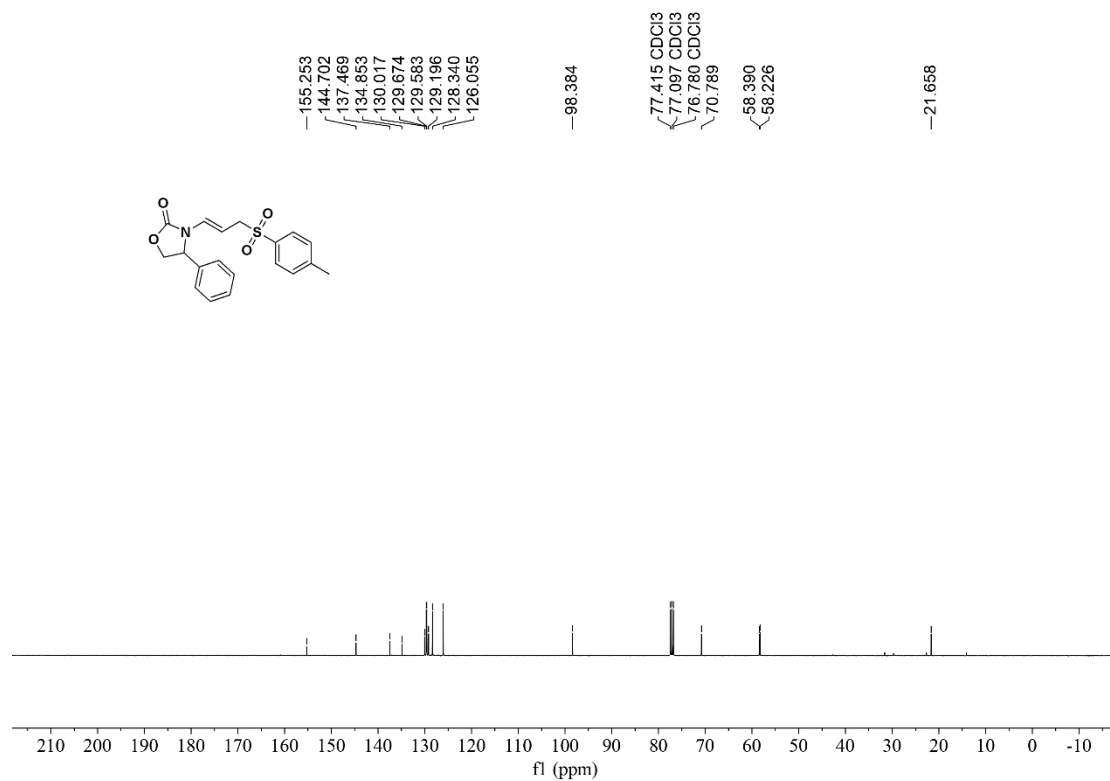

<sup>13</sup>C NMR Spectrum of Compound 3z

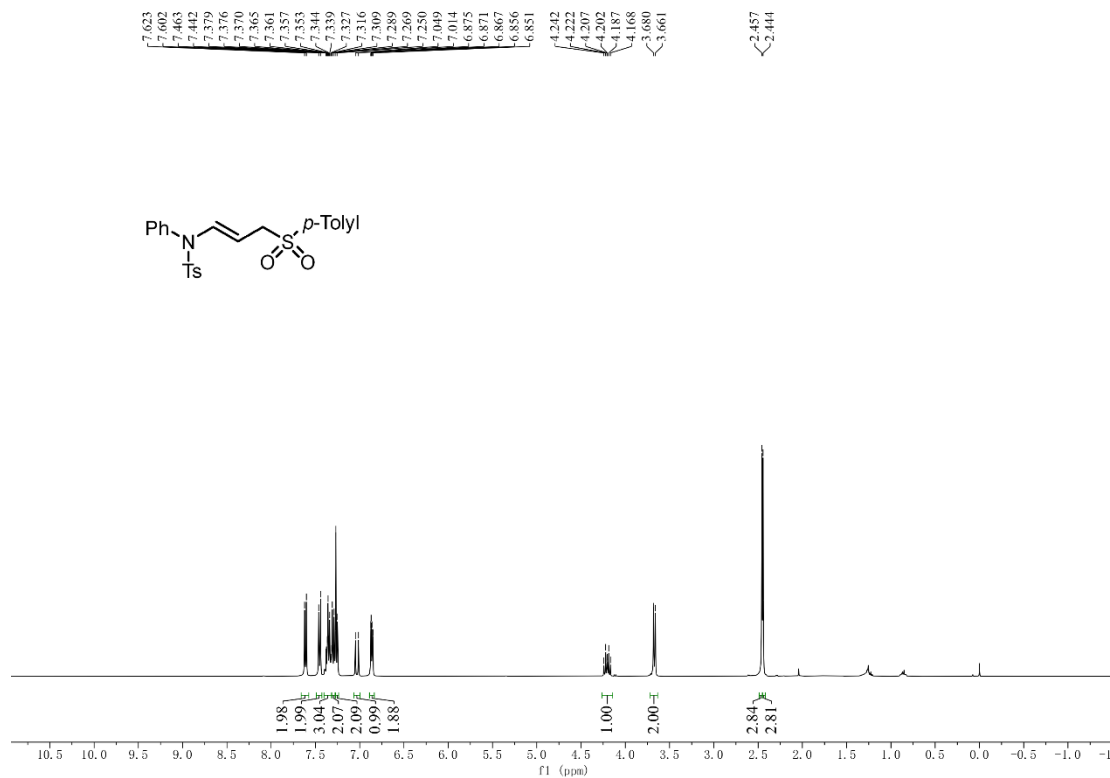

<sup>1</sup>H NMR Spectrum of Compound 3aa

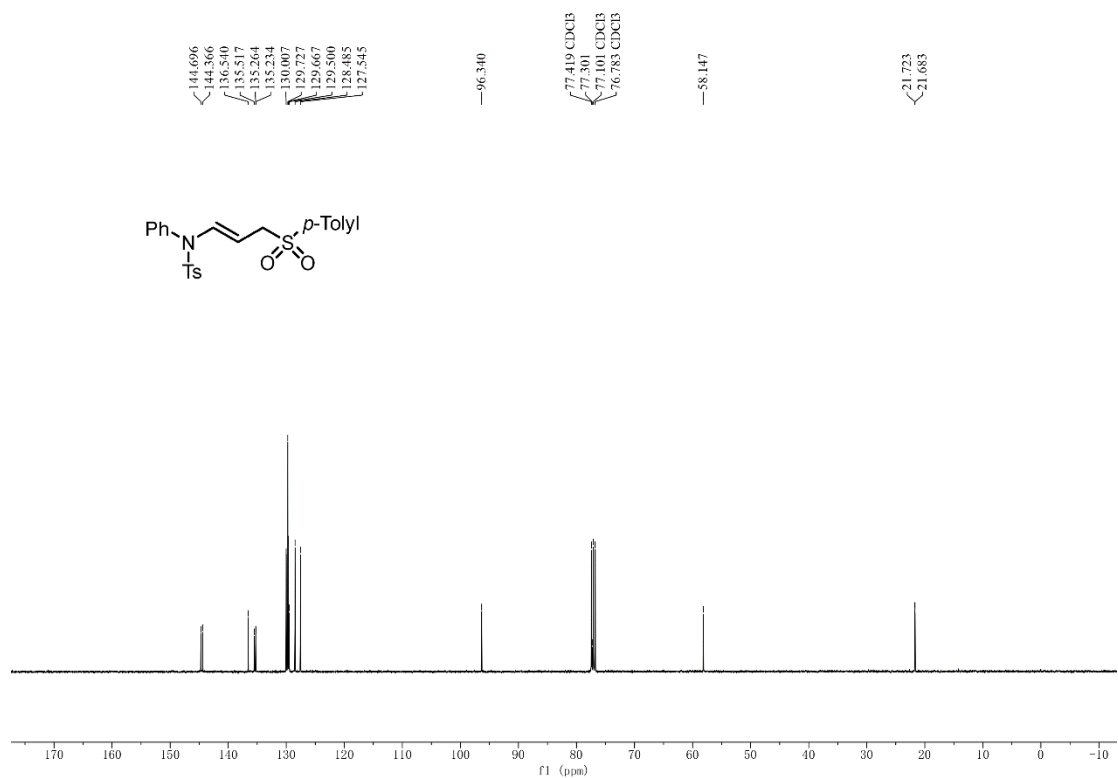

<sup>13</sup>C NMR Spectrum of Compound 3aa

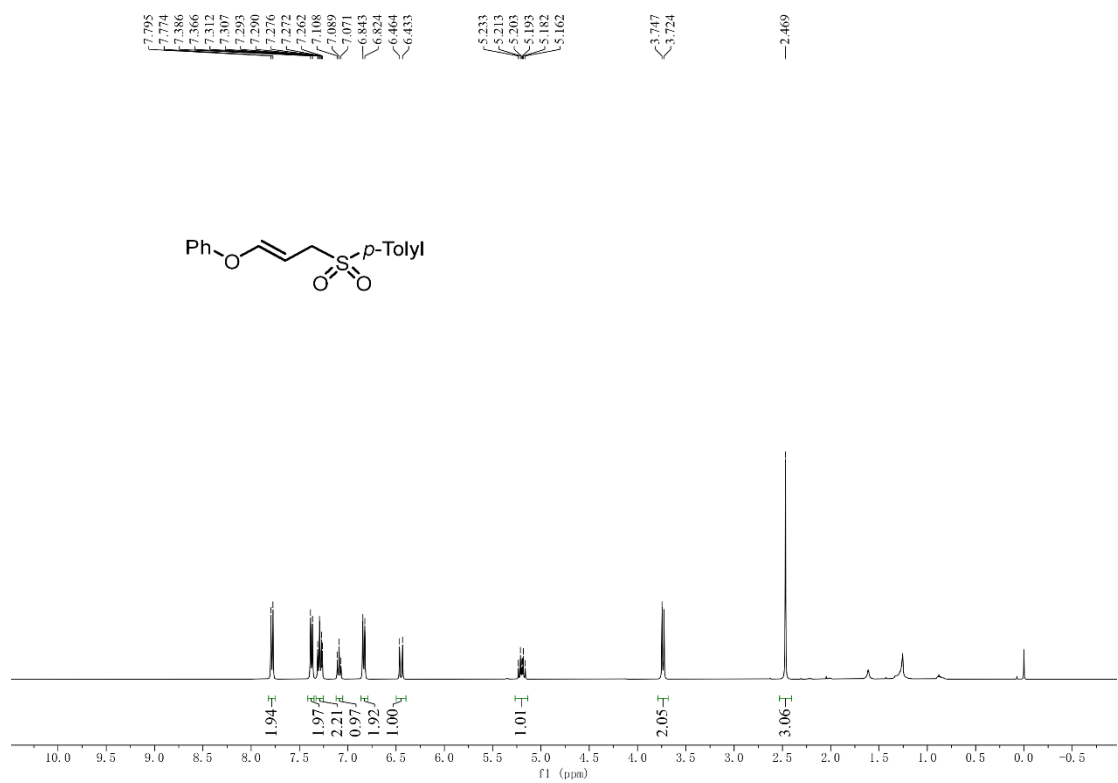

<sup>1</sup>H NMR Spectrum of Compound 3ab

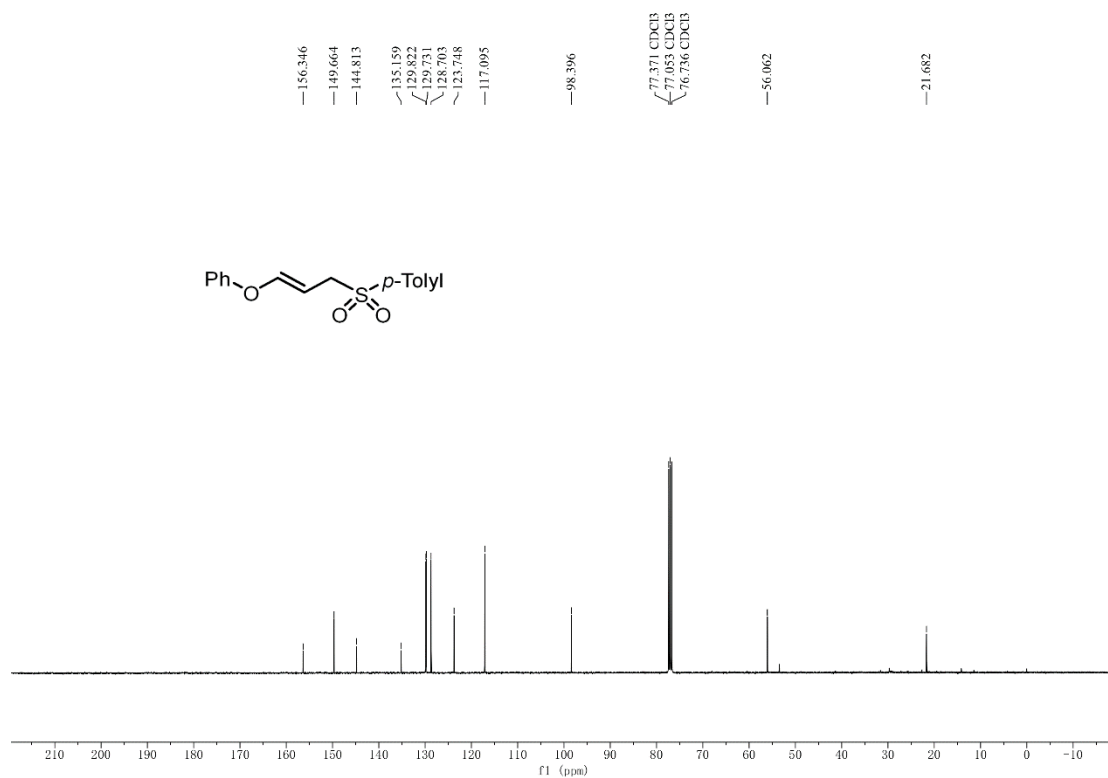

<sup>13</sup>C NMR Spectrum of Compound 3ab

Copies of <sup>1</sup>H, <sup>13</sup>C NMR and <sup>19</sup>F NMR Spectra of Products 4a-4j

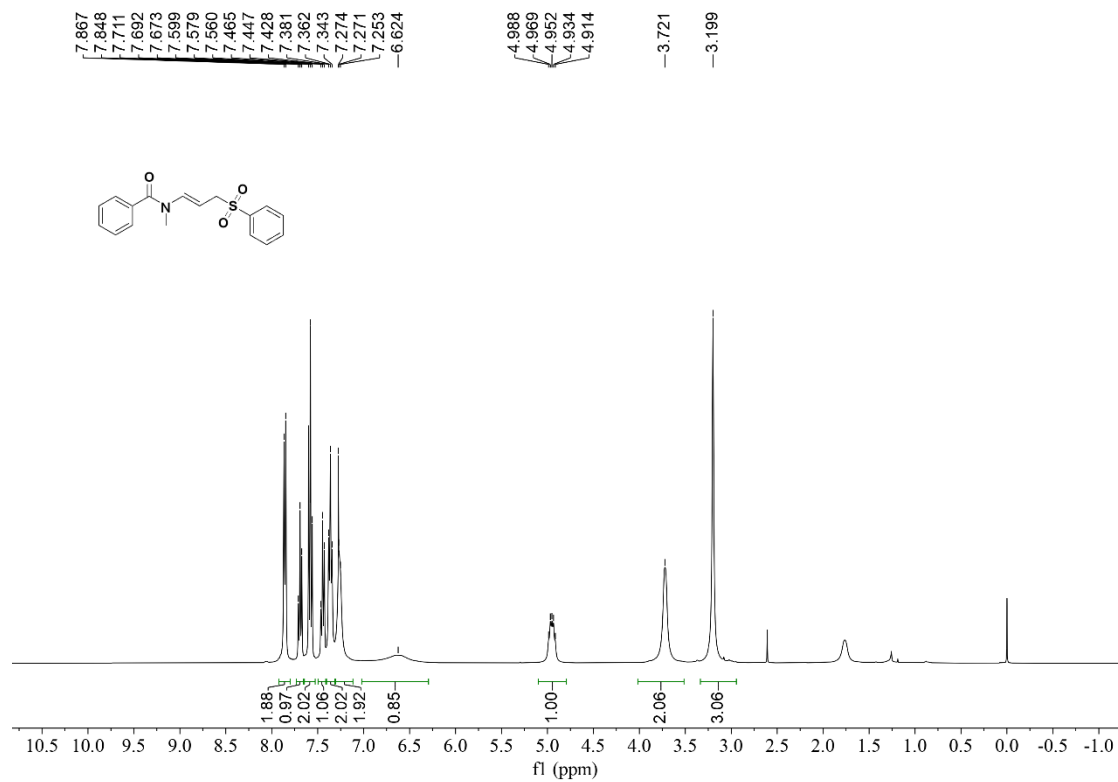

<sup>1</sup>H NMR Spectrum of Compound 4a

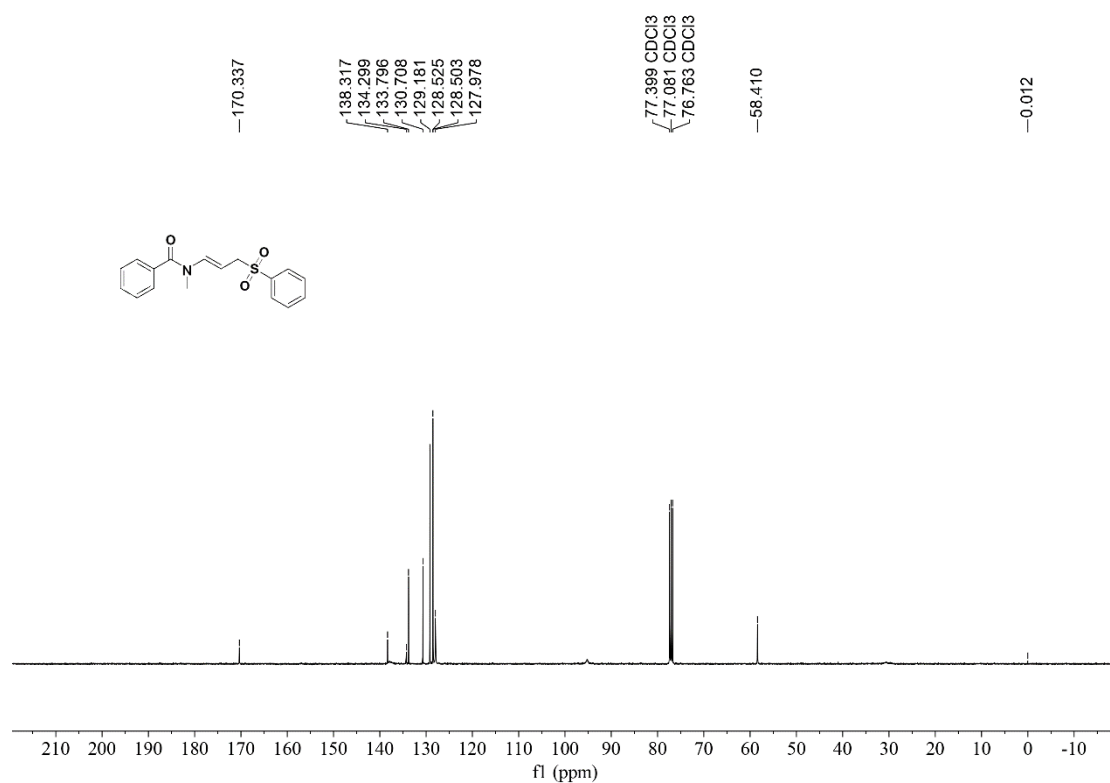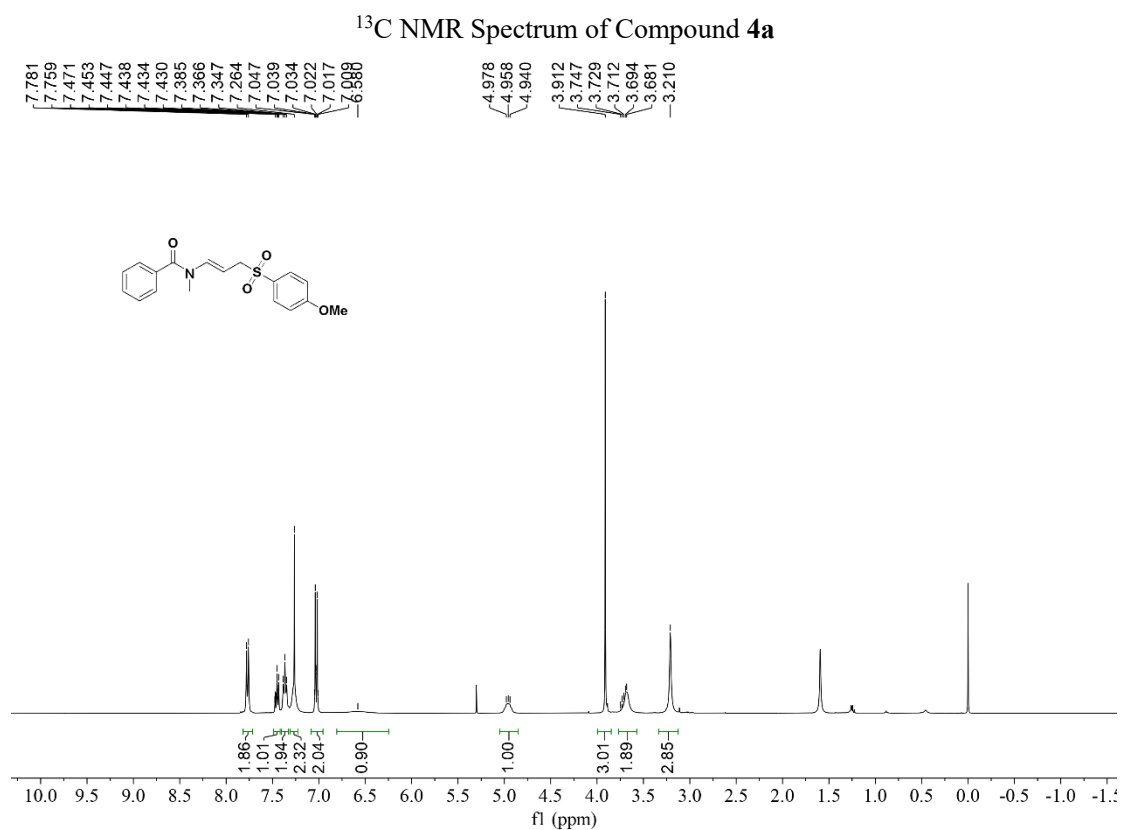

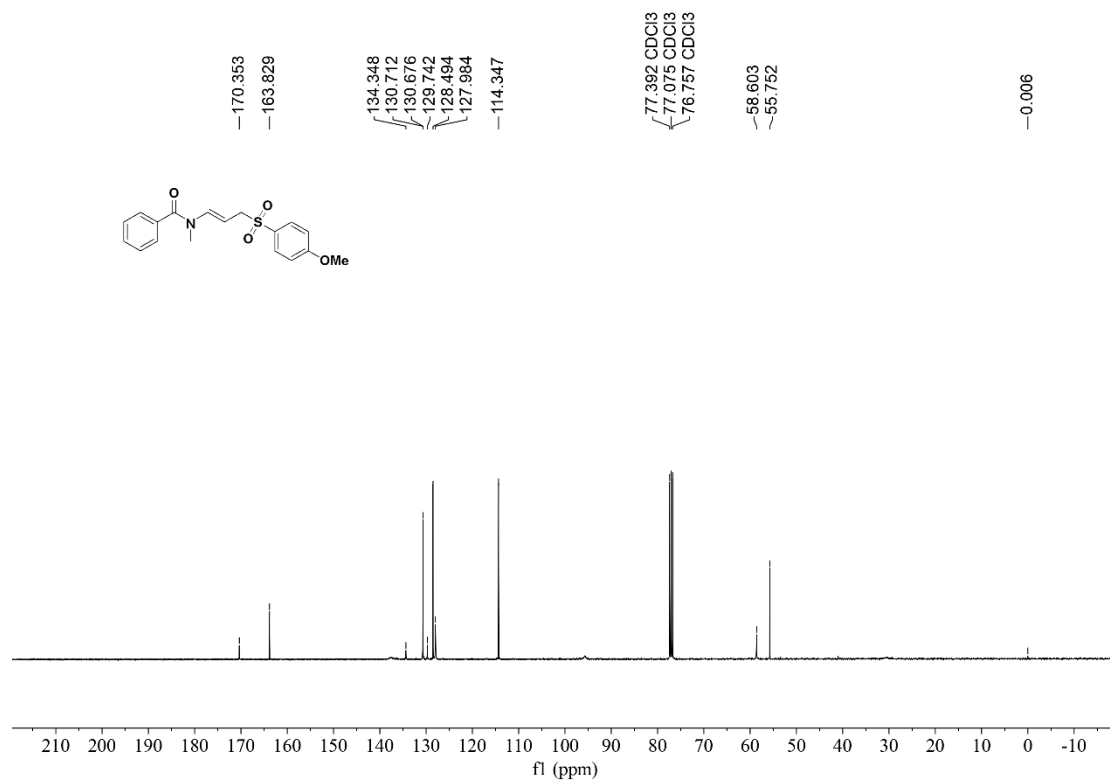

<sup>13</sup>C NMR Spectrum of Compound 4b

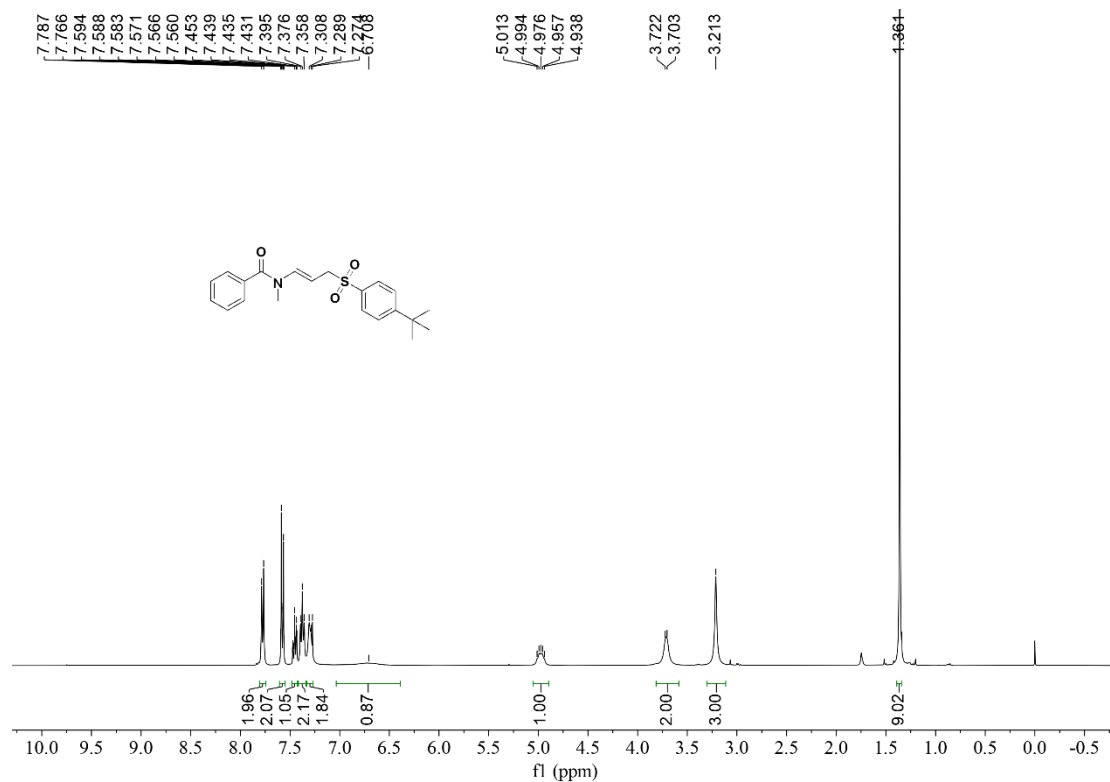

<sup>1</sup>H NMR Spectrum of Compound 4c

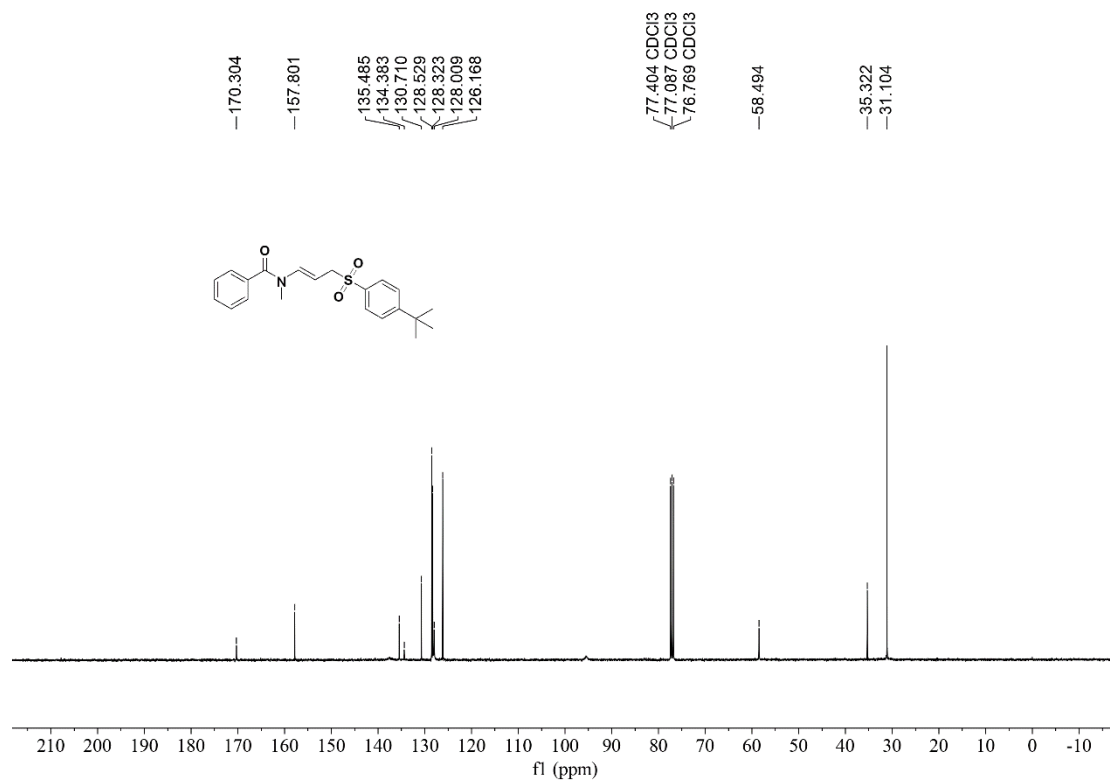

<sup>13</sup>C NMR Spectrum of Compound **4c**

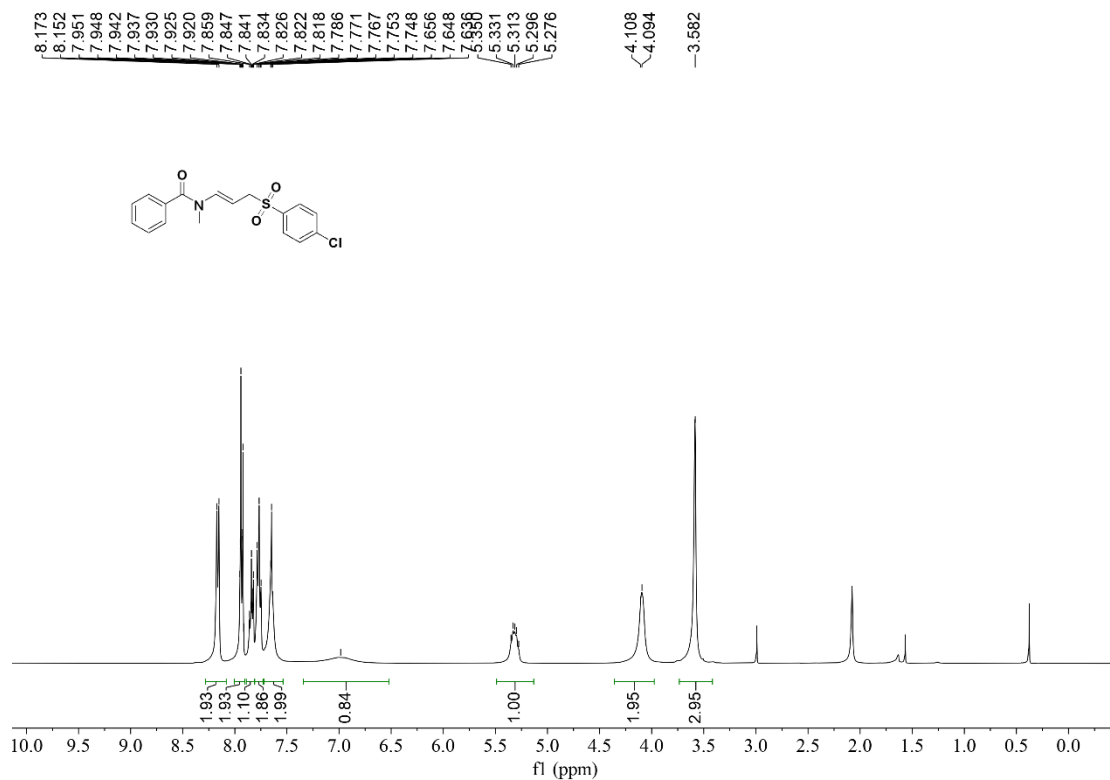

<sup>1</sup>H NMR Spectrum of Compound **4d**

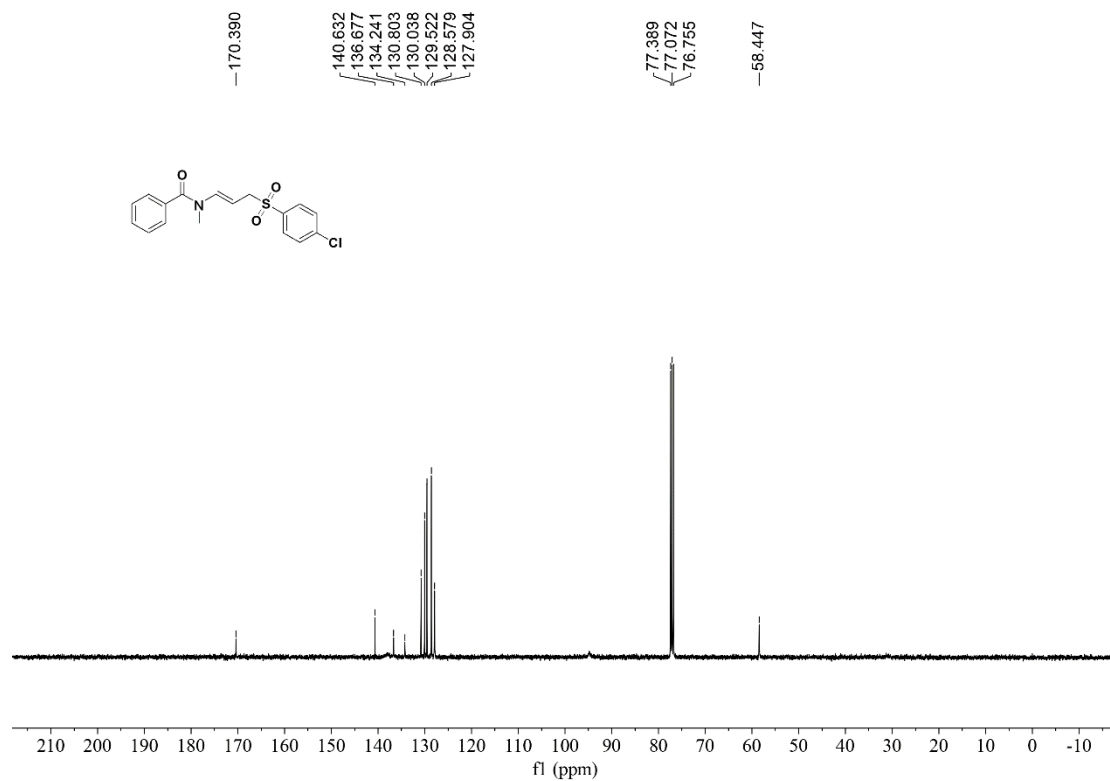

$^{13}\text{C}$  NMR Spectrum of Compound 4d

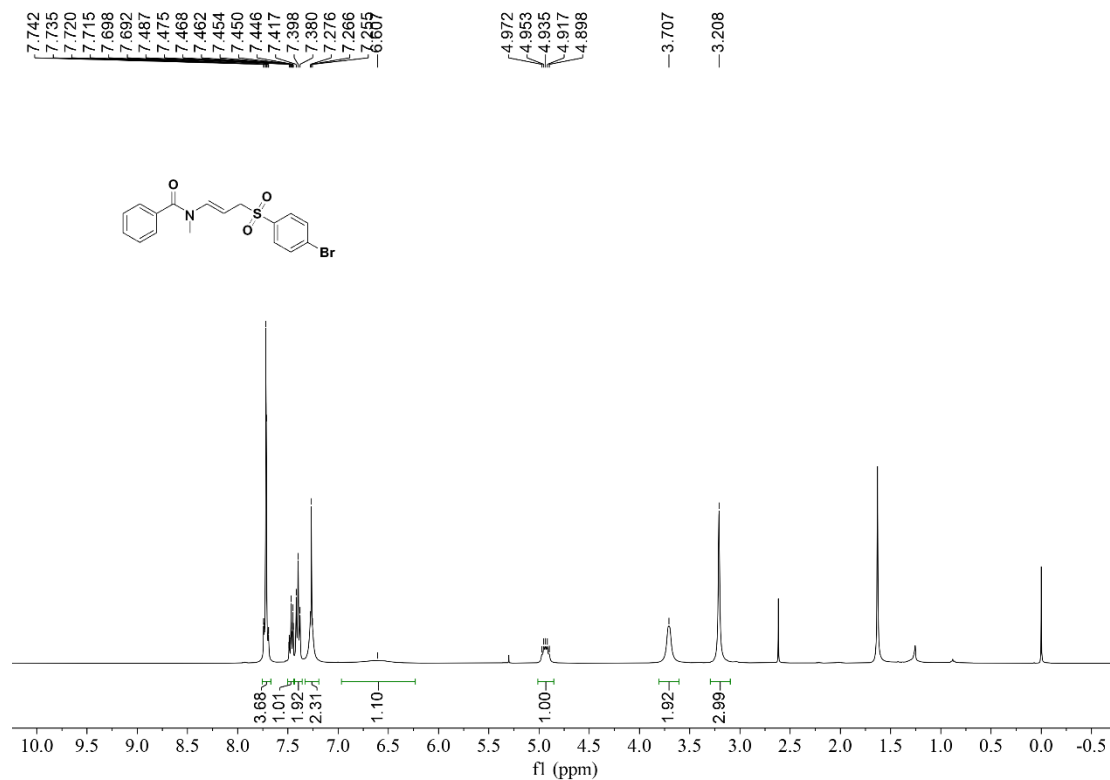

$^1\text{H}$  NMR Spectrum of Compound 4e

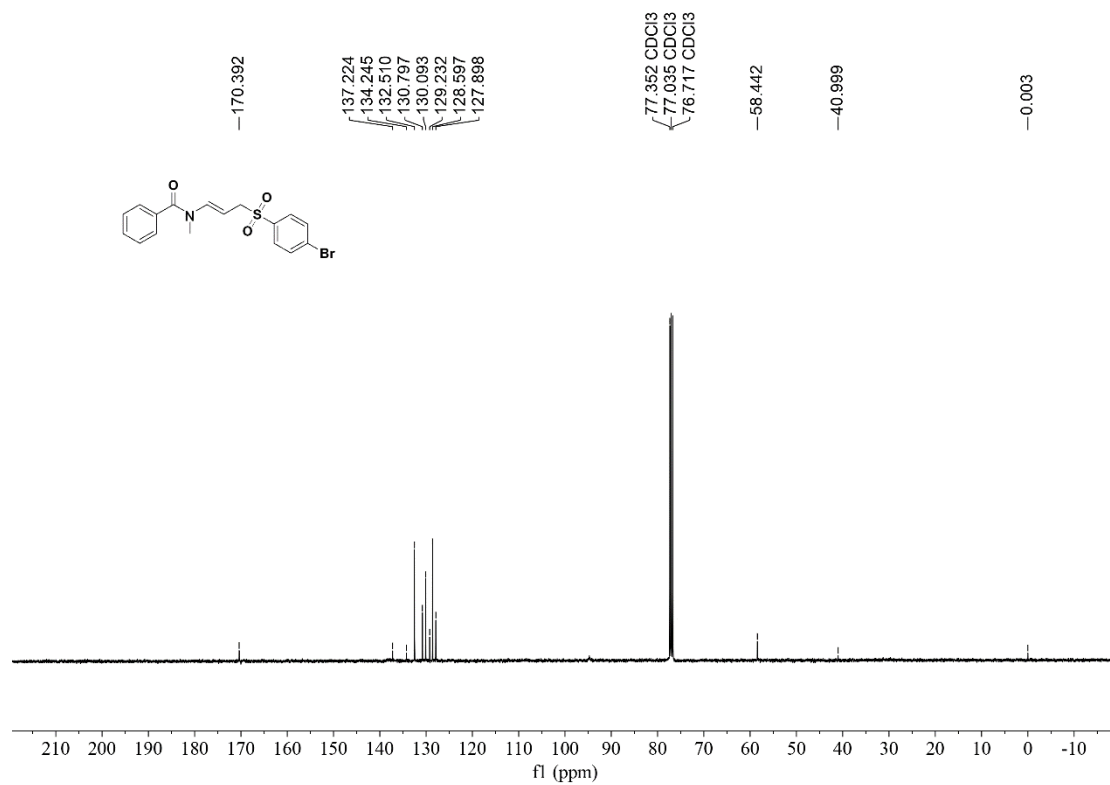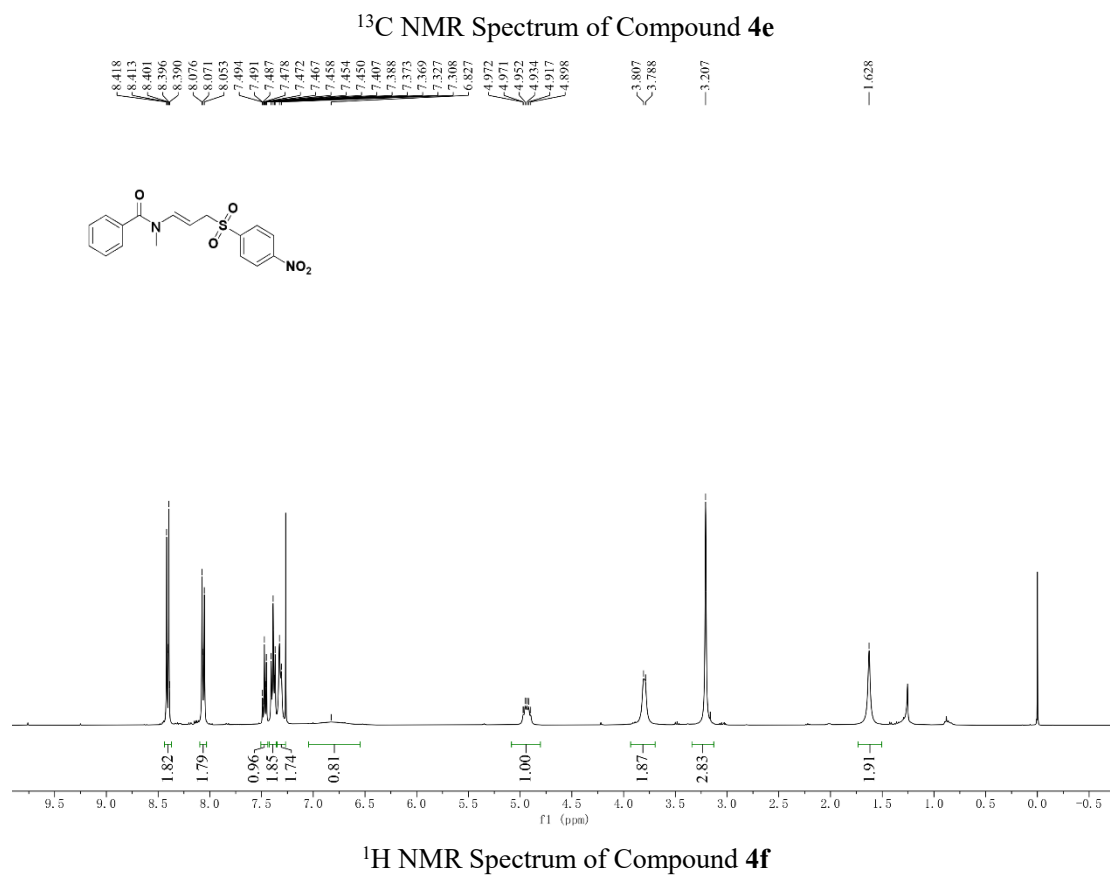



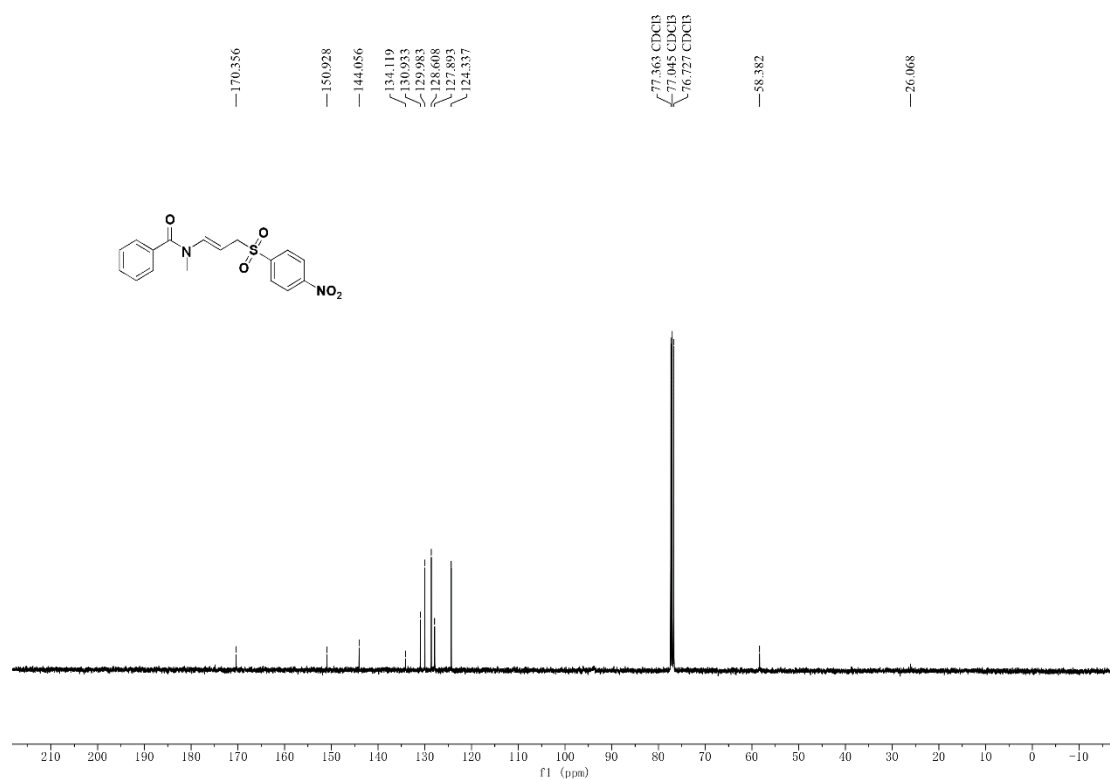

**<sup>13</sup>C NMR Spectrum of Compound 4f**

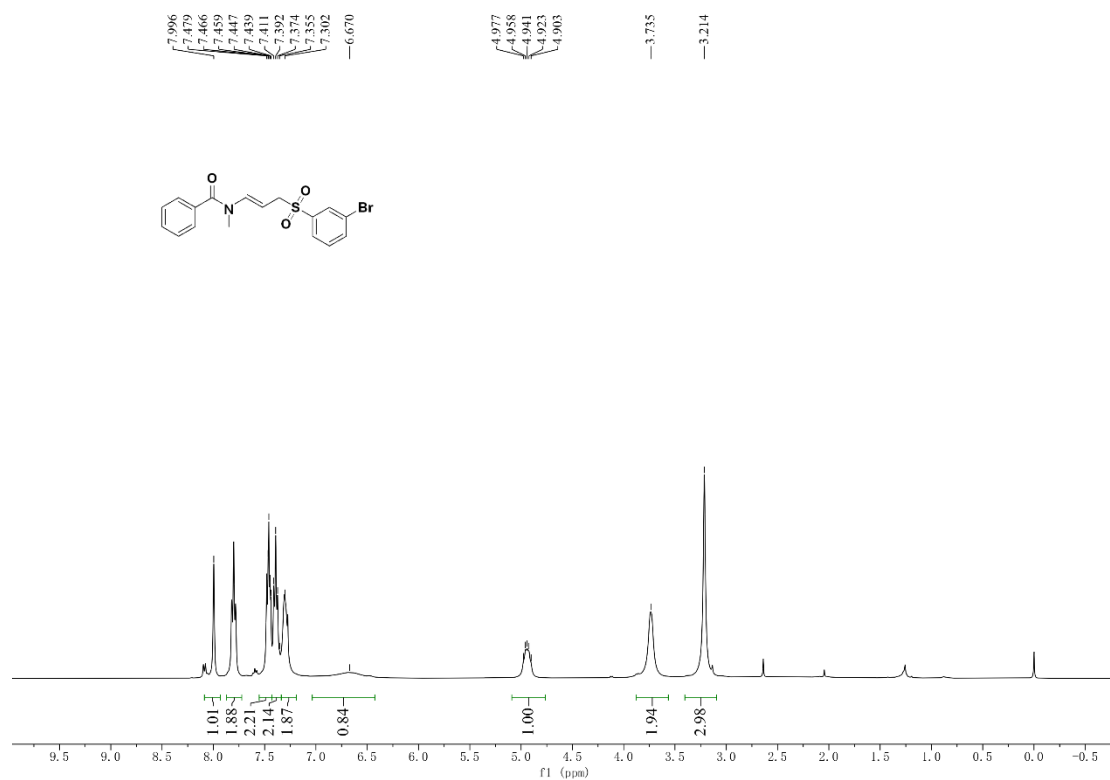

**<sup>1</sup>H NMR Spectrum of Compound 4g**

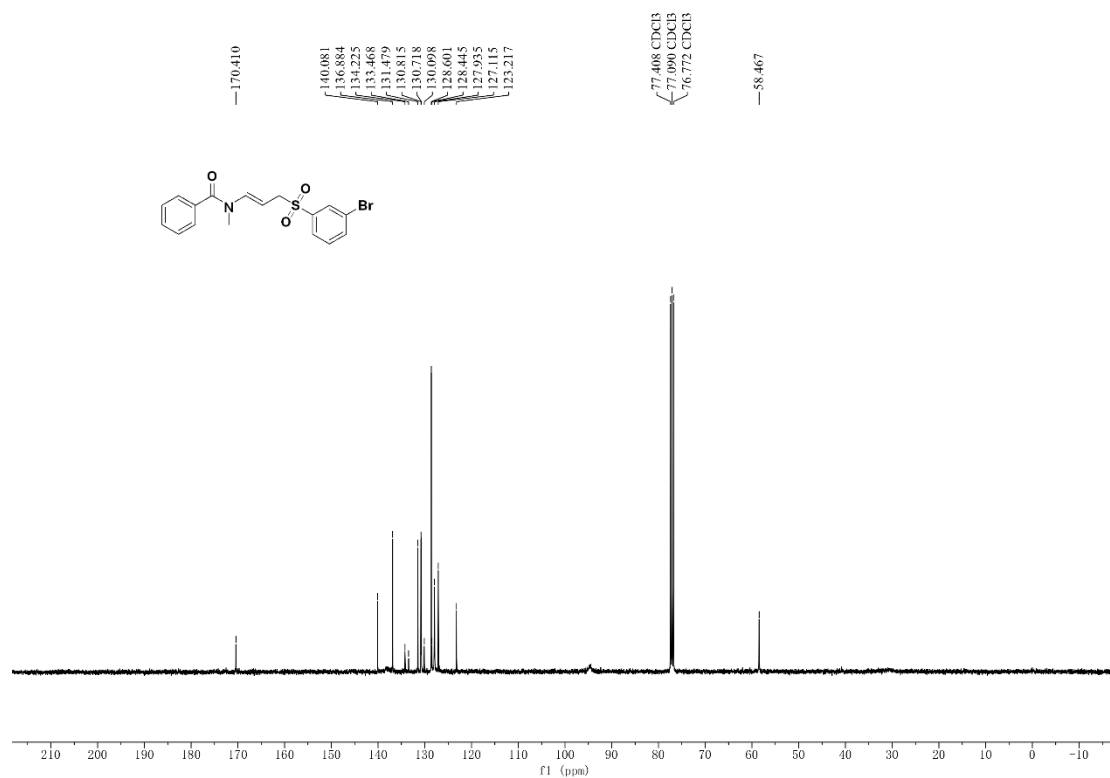

<sup>13</sup>C NMR Spectrum of Compound 4g

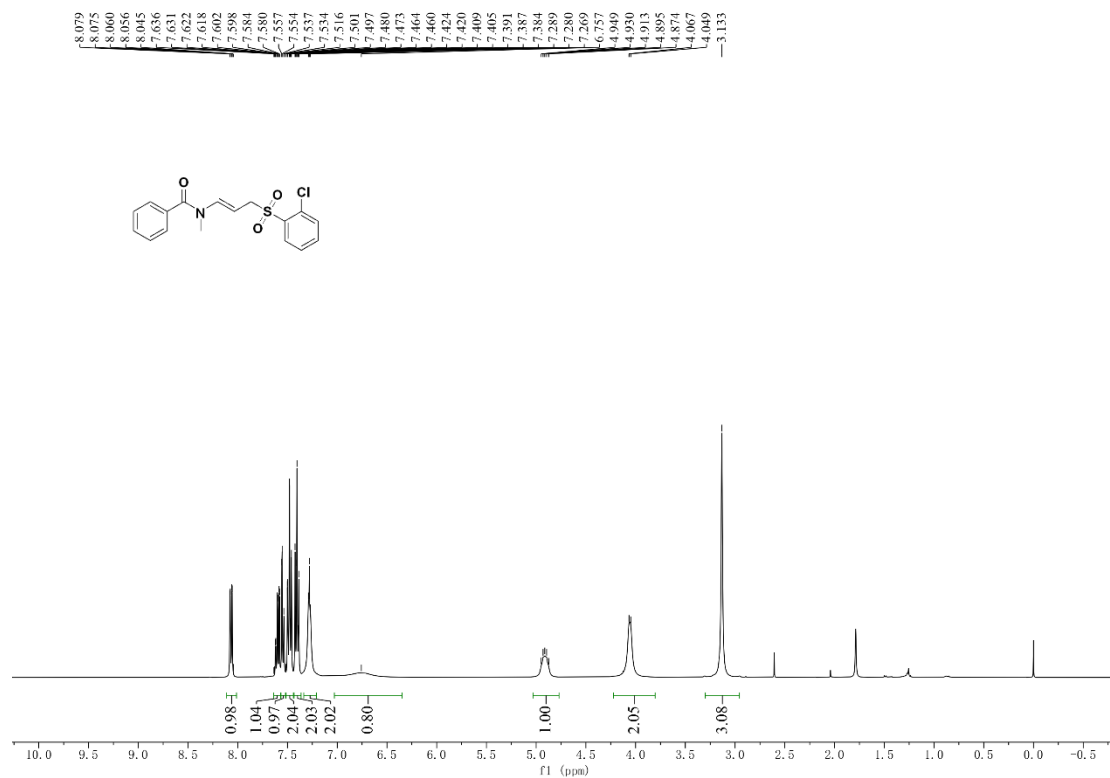

<sup>1</sup>H NMR Spectrum of Compound 4h

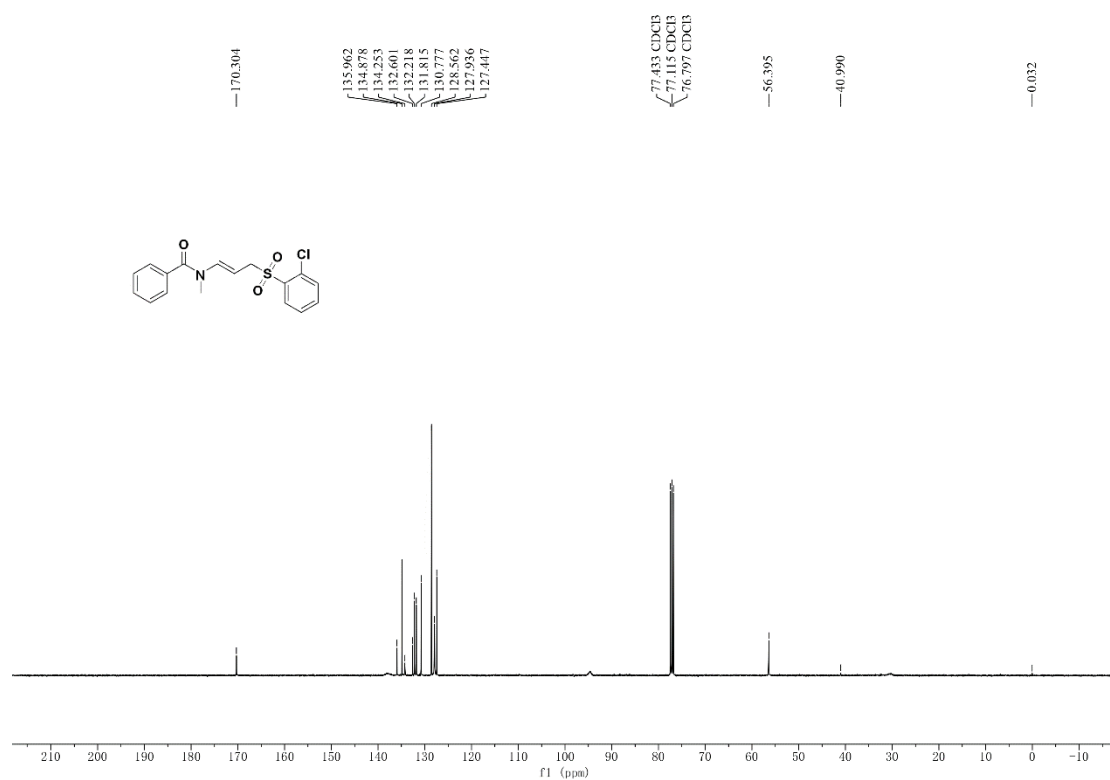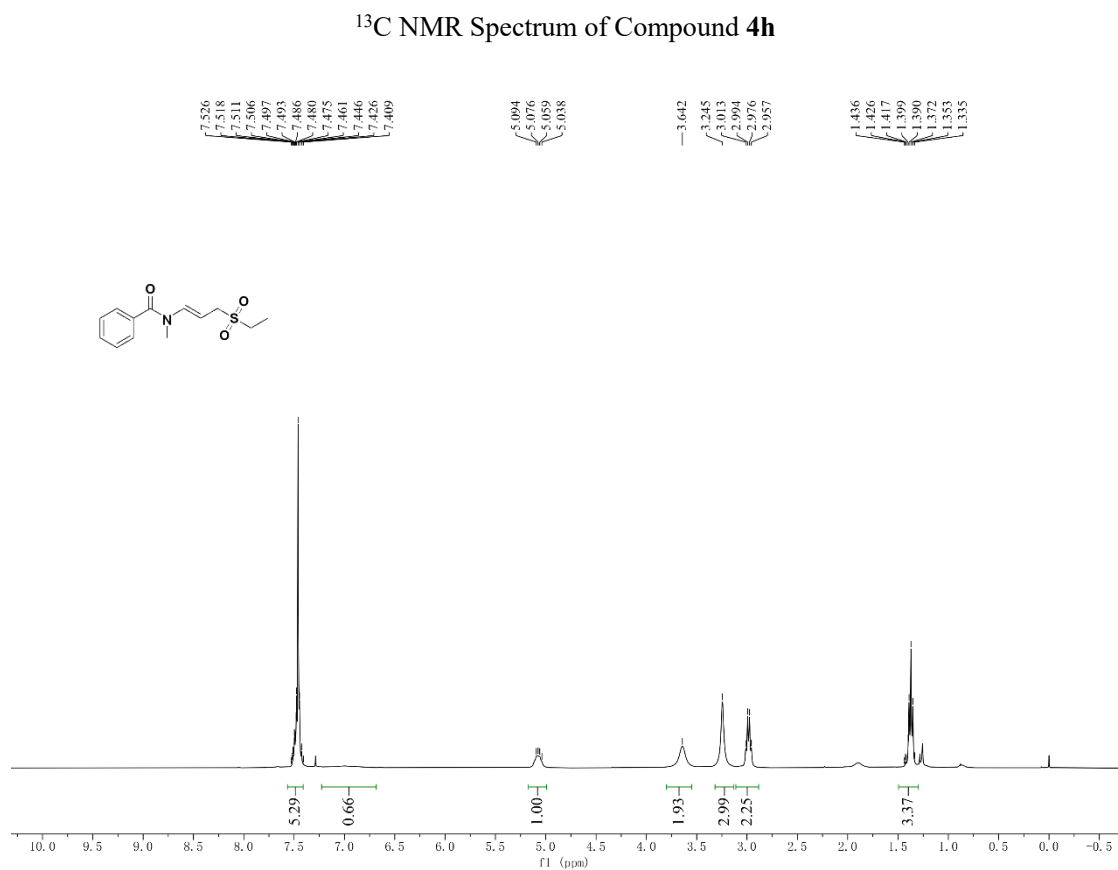

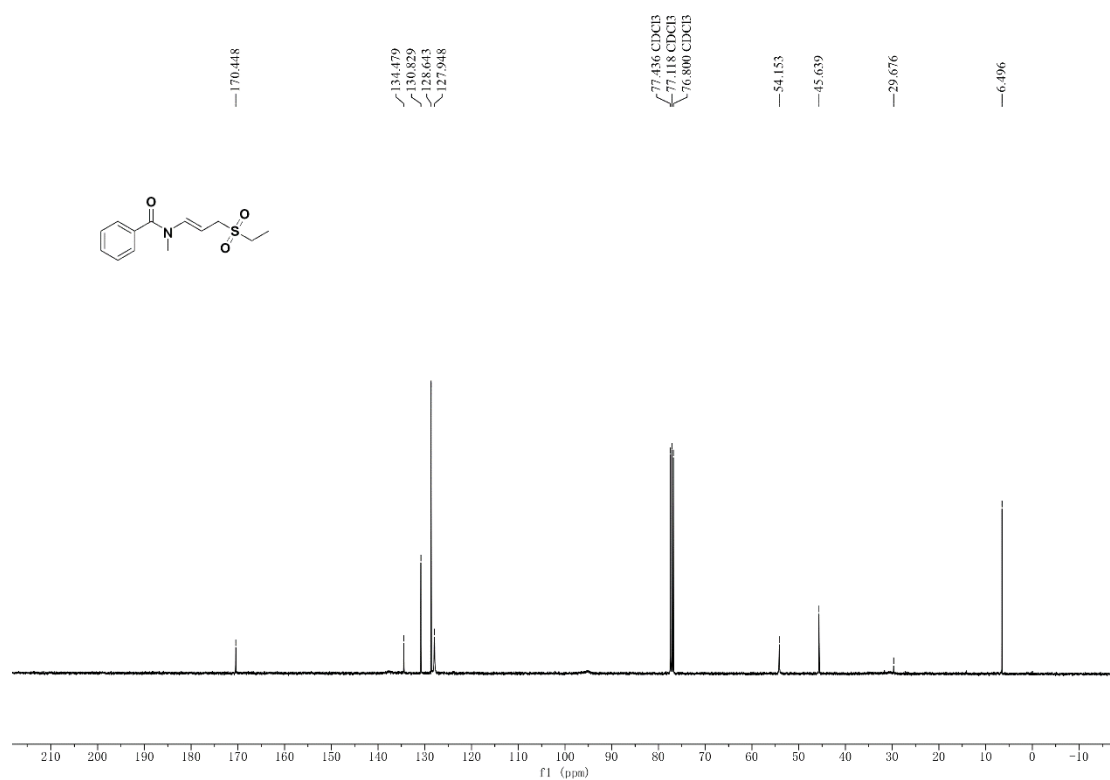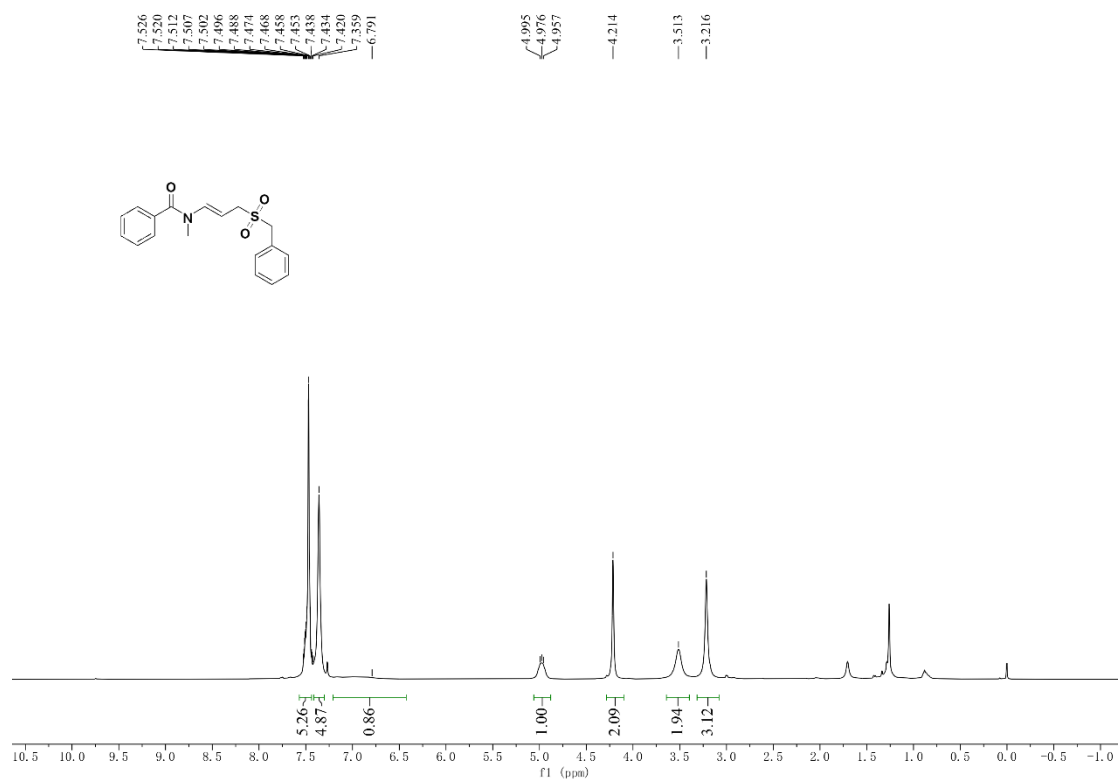

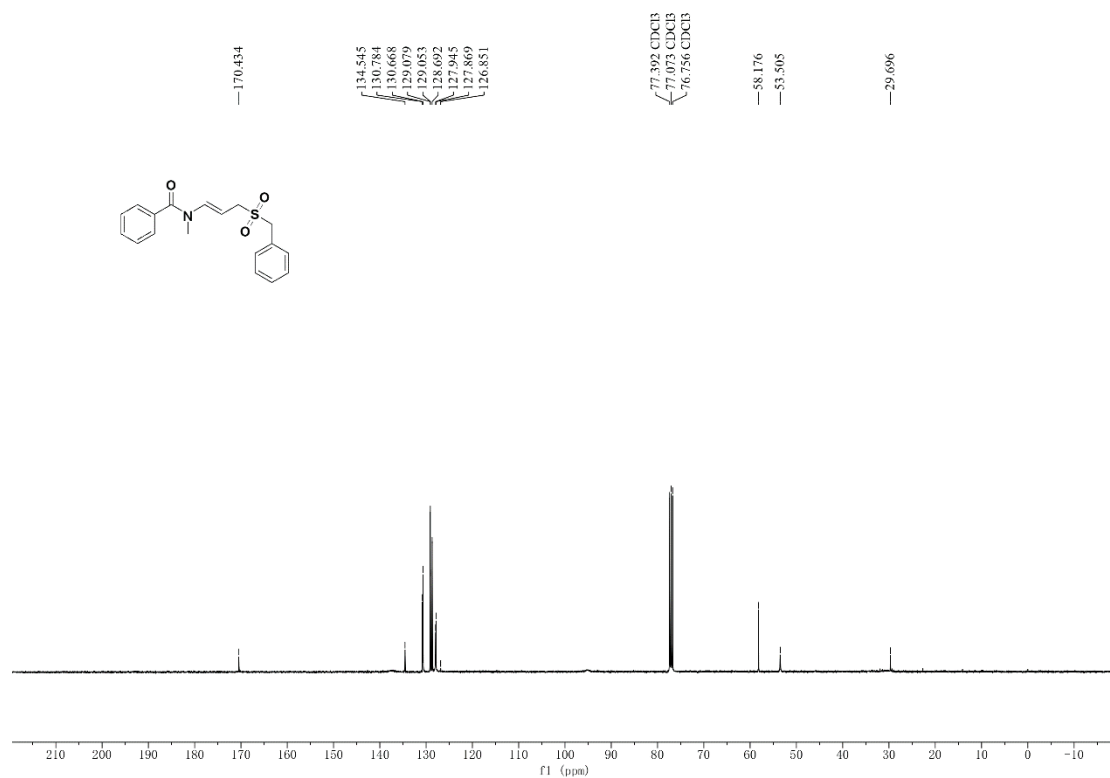

$^{13}\text{C}$  NMR Spectrum of Compound 4j
